# Supplementary material for: Selective synthesis of E-vinylsilanes and E,E-divinylsilanes via platinum-catalyzed hydrosilylation of alkynes with secondary silanes
Source: Royal Society of Chemistry journal article supplement (doi:10.1039/c8ra08640k), 2018-01-01
Supplement: c8ra08640k1.pdf [file c8ra08640k1.pdf]

*Supporting Information*  
for

**Selective synthesis of *E*-vinylsilanes and *E,E*-divinylsilanes  
via platinum-catalyzed hydrosilylation of alkynes with  
secondary silanes**

Patrycja Żak,\* Małgorzata Bołt, Cezary Pietraszuk

Adam Mickiewicz University in Poznań, Faculty of Chemistry, Umultowska 89b, 61-614 Poznań, Poland

- |                                                                                         |     |
|-----------------------------------------------------------------------------------------|-----|
| 1. NMR spectra and analytical data of isolated <i>E</i> -vinylsilanes                   | S2  |
| 2. NMR spectra and analytical data of isolated symmetrical <i>E,E</i> -divinylsilanes   | S38 |
| 3. NMR spectra and analytical data of isolated unsymmetrical <i>E,E</i> -divinylsilanes | S76 |

## 1. NMR spectra and analytical data of isolated *E*-vinylsilanes

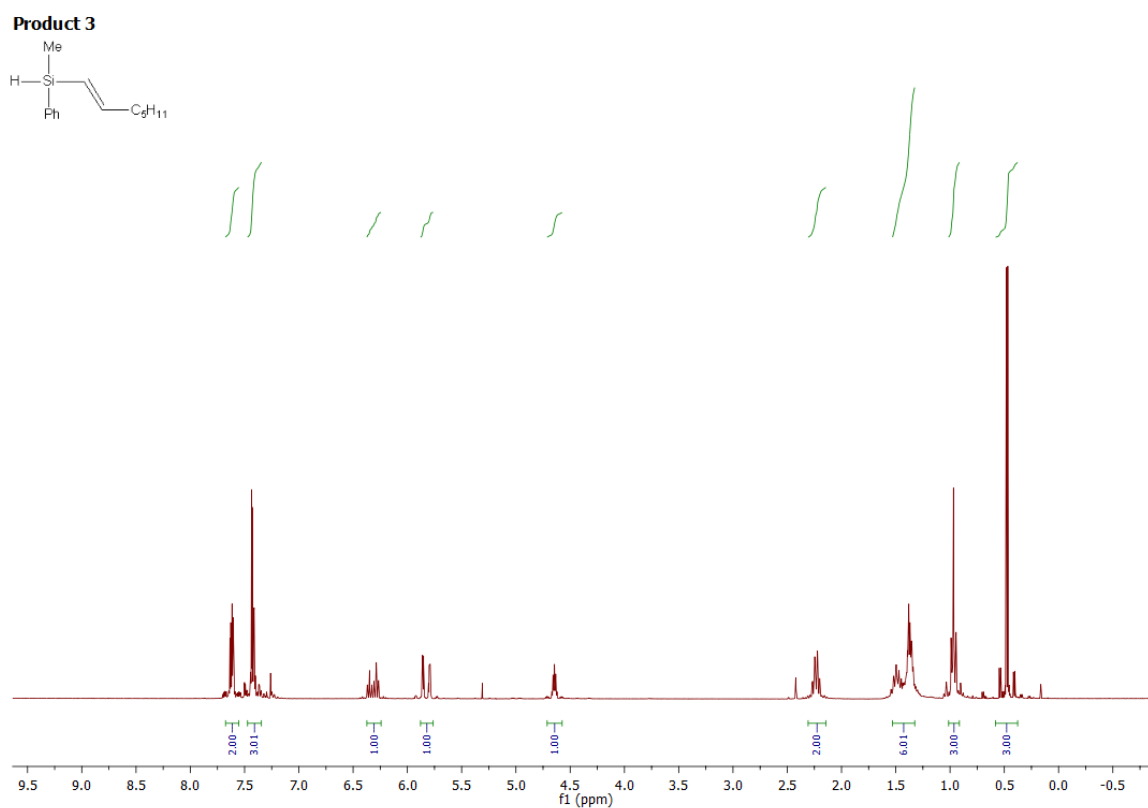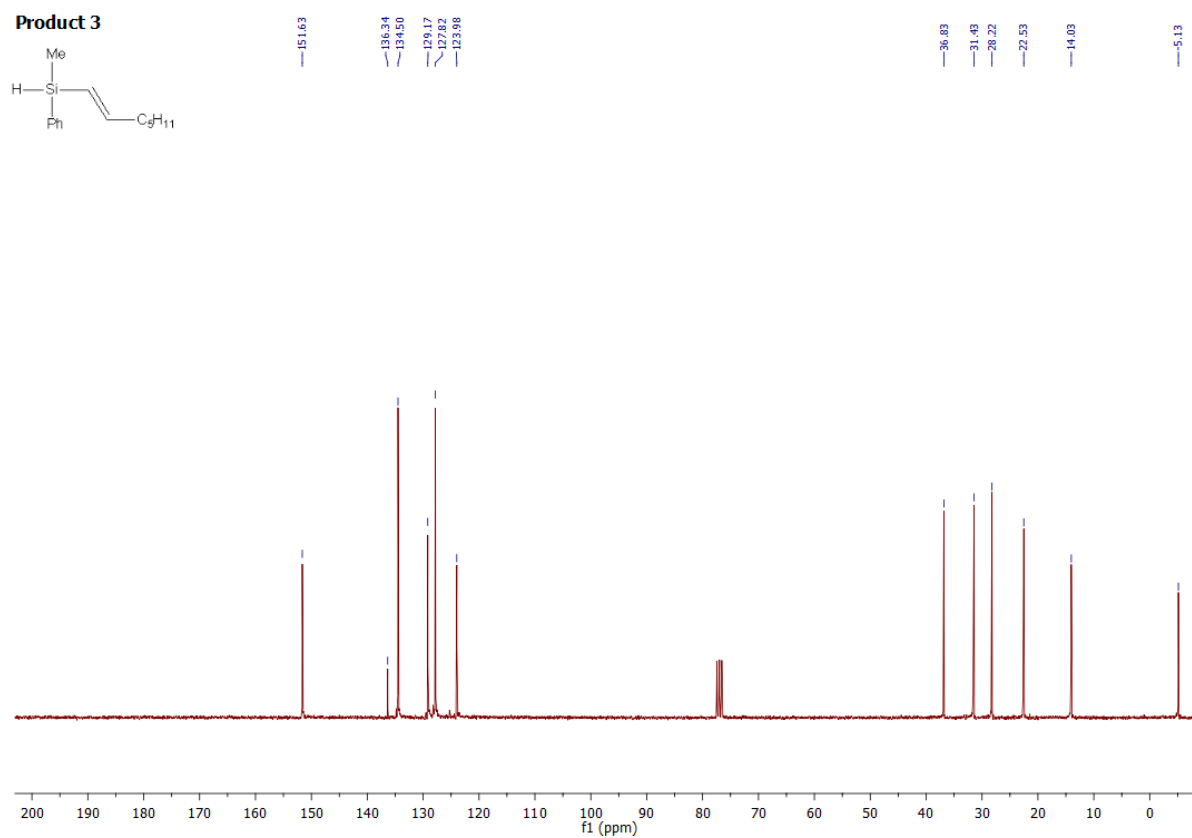

**Product 3**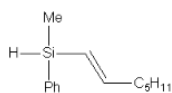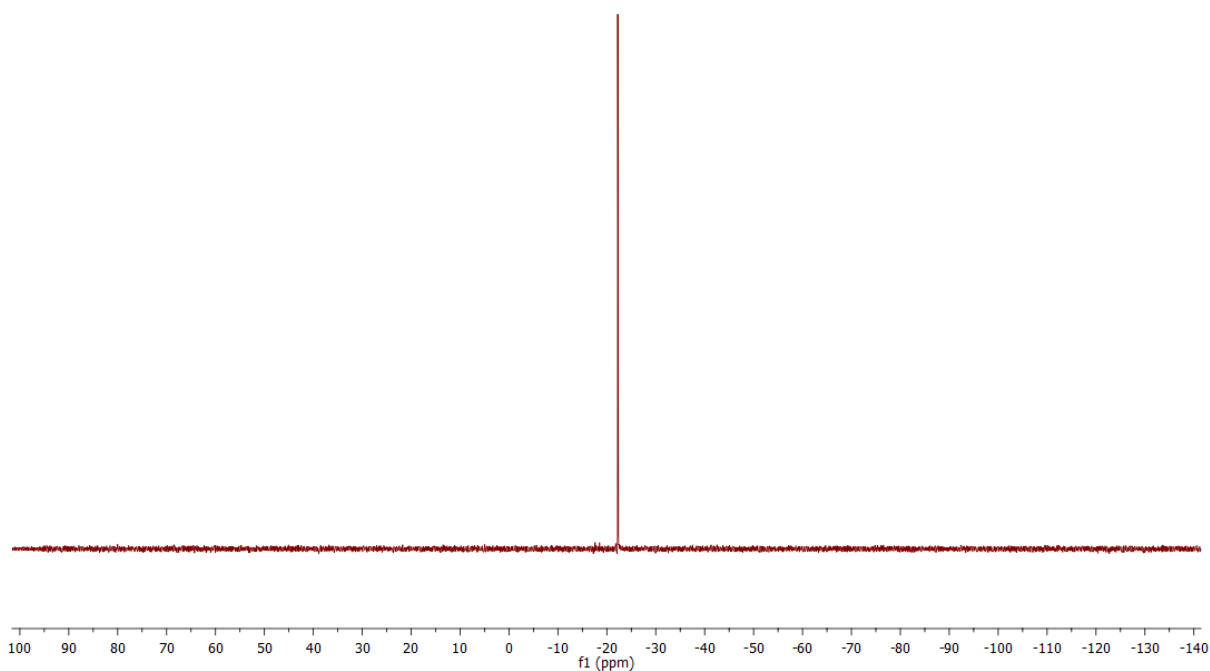**Figure S3.**  $^{29}\text{Si}$  NMR (79 MHz,  $\text{CDCl}_3$ ) of product **3***Analytical data of product 3:*

Isolated yield: 92% (200.7 mg);  $^1\text{H}$  NMR ( $\text{CDCl}_3$ ,  $\delta$ , ppm): 0.46 (d, 3H,  $J_{\text{HH}} = 3.8$  Hz,  $\text{CH}_3$ ), 0.97 (t, 3H,  $J_{\text{HH}} = 6.9$  Hz,  $-(\text{CH}_2)_4\text{CH}_3$ ), 1.32 – 1.53 (m, 6H,  $-(\text{CH}_2)_4\text{CH}_3$ ), 2.14 – 2.31 (m, 2H,  $=\text{CHCH}_2$ ), 4.57 – 4.71 (m, 1H,  $\text{SiH}$ ), 5.76 – 5.88 (m, 1H,  $=\text{CHSi}$ ), 6.32 (dt, 1H,  $J_{\text{HH}} = 18.5, 6.2$  Hz,  $=\text{CHCH}_2$ ), 7.34 – 7.47 (m, 3H, Ph), 7.55 – 7.68 (m, 2H, Ph);  $^{13}\text{C}$  NMR ( $\text{CDCl}_3$ ,  $\delta$ , ppm): -5.11 ( $\text{CH}_3$ ), 14.03, 22.53, 28.22, 31.43, 36.83, 123.98, 127.82, 129.17, 134.50, 136.34, 151.63;  $^{29}\text{Si}$  NMR ( $\text{CDCl}_3$ ,  $\delta$ , ppm): -22.23; MS:  $m/z$  (rel. intensity): 105 (21), 121 (42), 122 (11), 134 (11), 216 (15), 217 (100), 218 (38,  $\text{M}^+$ ); anal. calcd. for  $\text{C}_{14}\text{H}_{22}\text{Si}$  (%): C: 76.99, H: 10.15; found: C: 76.90, H: 10.11.

**Product 4**

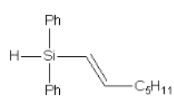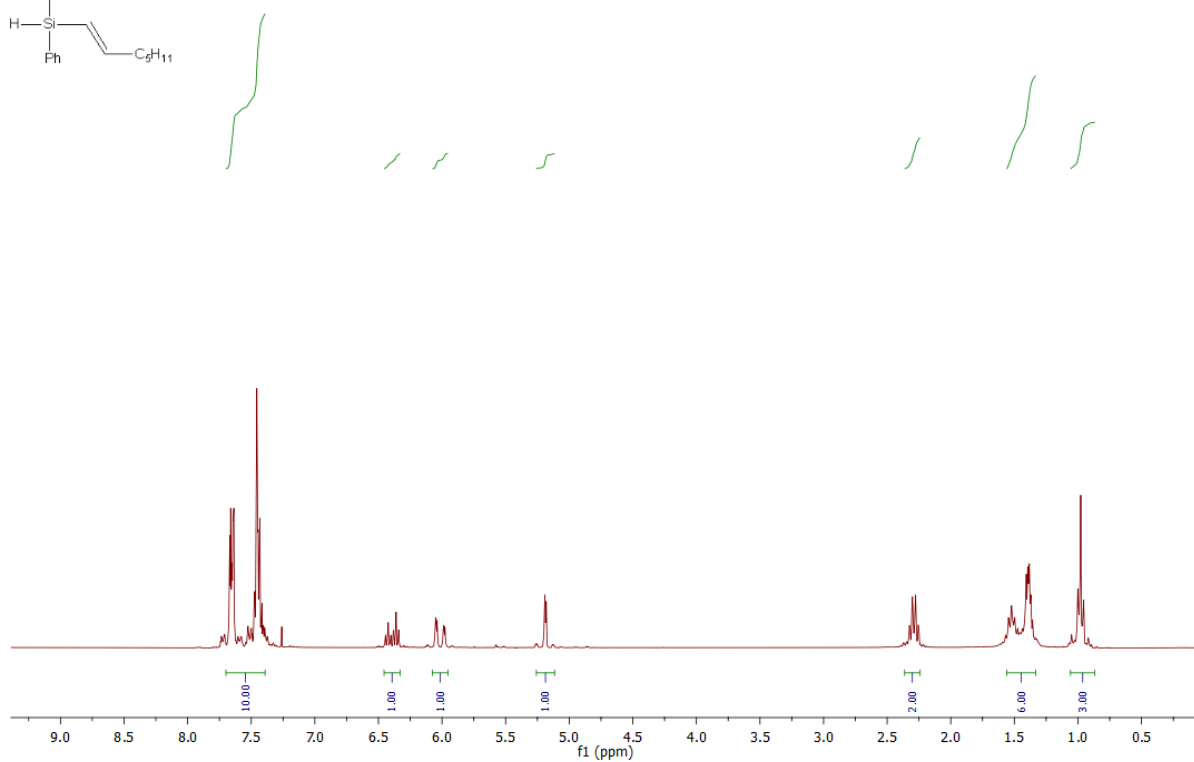

**Figure S4.** <sup>1</sup>H NMR (300 MHz, CDCl<sub>3</sub>) of product 4

**Product 4**

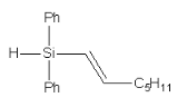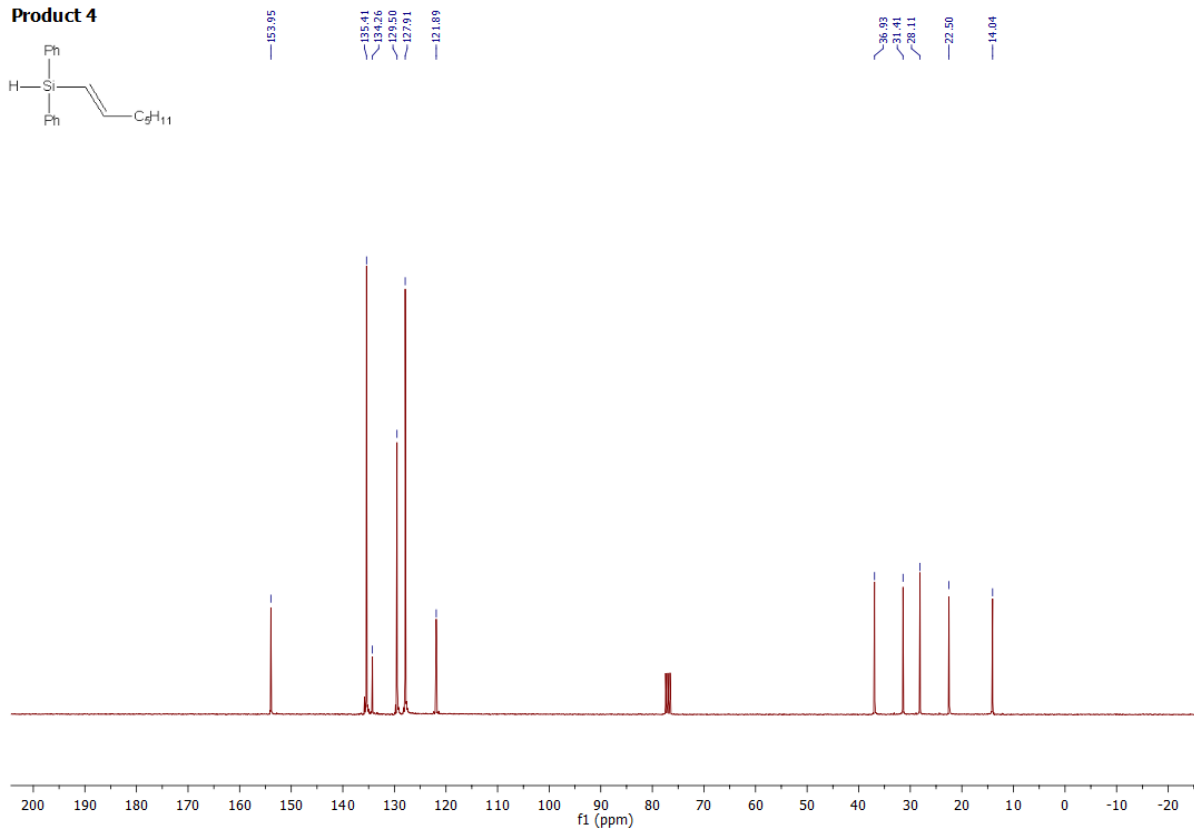

**Figure S5.** <sup>13</sup>C NMR (75 MHz, CDCl<sub>3</sub>) of product 4

**Product 4**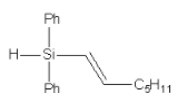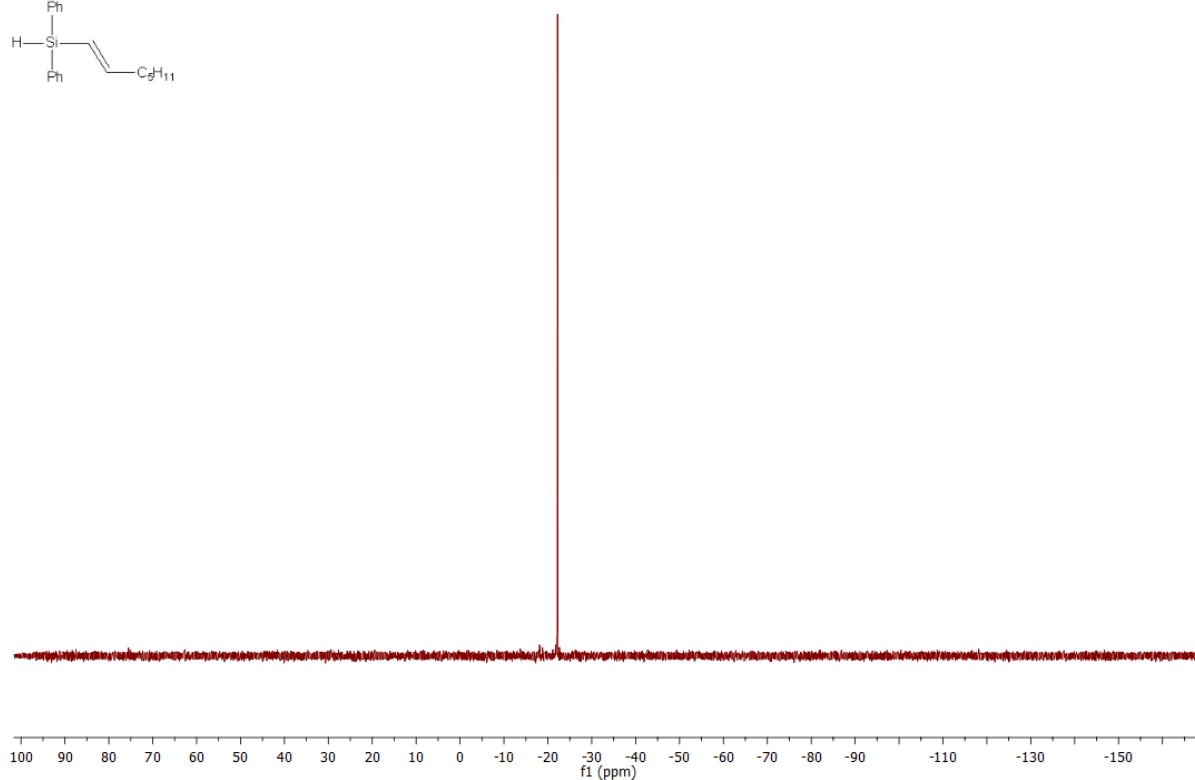**Figure S6.**  $^{29}\text{Si}$  NMR (79 MHz,  $\text{CDCl}_3$ ) of product **4***Analytical data of product 4:*

Isolated yield: 93% (260.5 mg);  $^1\text{H}$  NMR ( $\text{CDCl}_3$ ,  $\delta$ , ppm): 0.98 (t, 3H,  $J_{\text{HH}} = 6.8$  Hz,  $-(\text{CH}_2)_4\text{CH}_3$ ), 1.33 – 1.56 (m, 6H,  $-(\text{CH}_2)_4\text{CH}_3$ ), 2.24 – 2.36 (m, 2H,  $=\text{CHCH}_2$ ), 5.19 (d, 1H,  $J_{\text{HH}} = 3.1$  Hz, SiH), 5.95 – 6.01 (m, 1H,  $=\text{CHSi}$ ), 6.39 (dt, 1H,  $J_{\text{HH}} = 18.5, 6.3$  Hz,  $=\text{CHCH}_2$ ), 7.39 – 7.70 (m, 10H, Ph);  $^{13}\text{C}$  NMR ( $\text{CDCl}_3$ ,  $\delta$ , ppm): 14.04, 22.50, 28.11, 31.41, 36.93, 121.89, 127.91, 129.50, 134.26, 135.41, 153.95;  $^{29}\text{Si}$  NMR ( $\text{CDCl}_3$ ,  $\delta$ , ppm): -22.21; MS:  $m/z$  (rel. intensity): 53 (18), 105 (43), 106 (20), 107 (19), 131 (15), 145 (17), 180 (21), 181 (43), 182 (35), 183 (61), 184 (21), 203 (27), 251 (19), 259 (23), 267 (17), 279 (100), 280 (32,  $\text{M}^+$ ).

**Product 5**

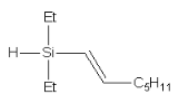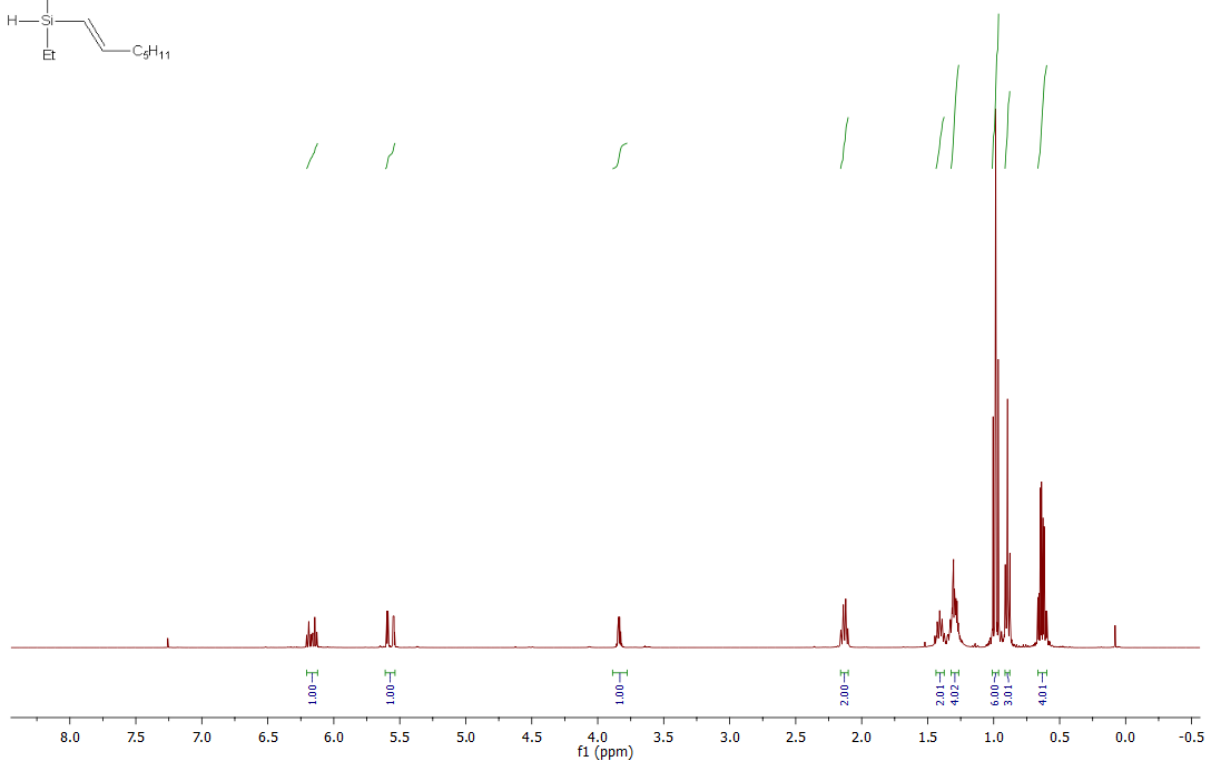

**Figure S7.** <sup>1</sup>H NMR (400 MHz, CDCl<sub>3</sub>) of product 5

**Product 5**

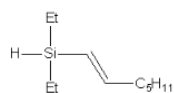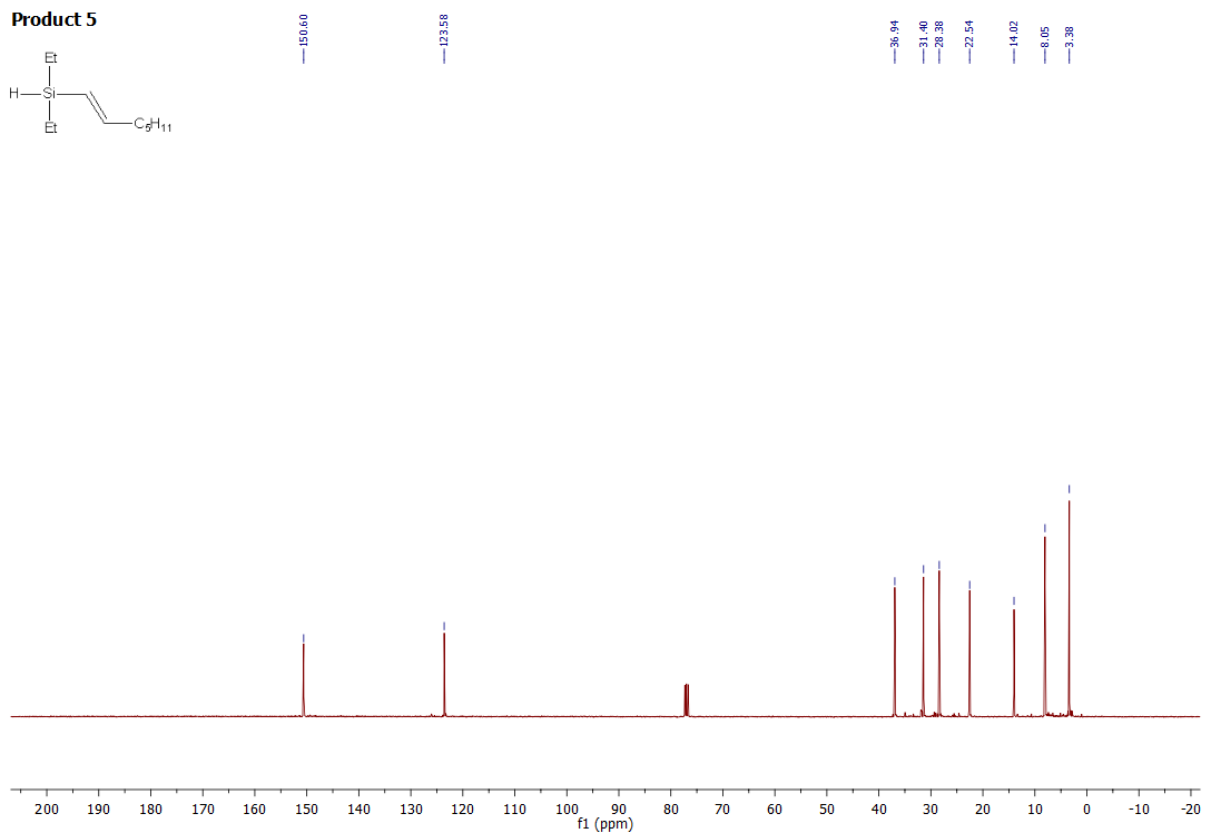

**Figure S8.** <sup>13</sup>C NMR (75 MHz, CDCl<sub>3</sub>) of product 5

**Product 5**

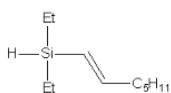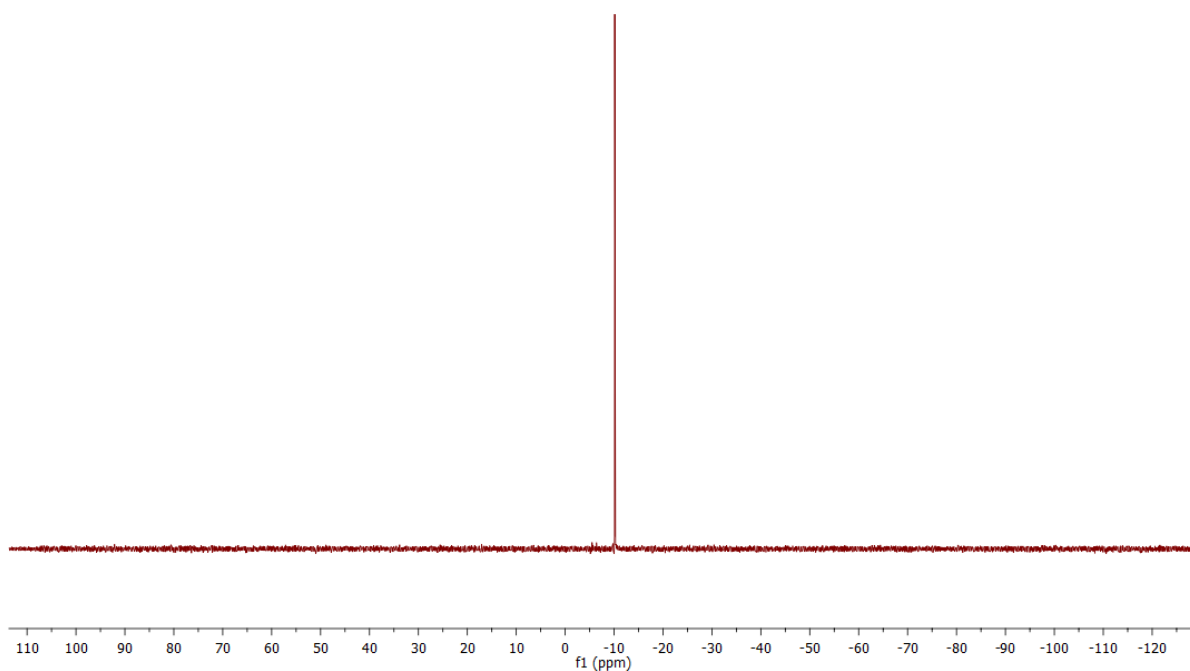

**Figure S9.**  $^{29}\text{Si}$  NMR (79 MHz,  $\text{CDCl}_3$ ) of product 5

*Analytical data of product 5:*

Isolated yield: 90% (165.7 mg);  $^1\text{H}$  NMR ( $\text{CDCl}_3$ ,  $\delta$ , ppm): 0.60 -0.66 (m, 4H,  $\text{CH}_3\text{CH}_2^-$ ), 0.89 (t, 3H,  $J_{\text{HH}} = 7.0$  Hz,  $-(\text{CH}_2)_4\text{CH}_3$ ), 0.99 (t, 6H,  $J_{\text{HH}} = 7.8$  Hz,  $\text{CH}_3\text{CH}_2^-$ ), 1.26 – 1.32 (m, 4H,  $-(\text{CH}_2)_4\text{CH}_3$ ), 1.38 – 1.44 (m, 2H,  $-(\text{CH}_2)_4\text{CH}_3$ ), 2.10 – 2.16 (m, 2H,  $=\text{CHCH}_2$ ), 3.78 – 3.89 (m, 1H, SiH), 5.52 – 5.62 (m, 1H,  $=\text{CHSi}$ ), 6.17 (dt, 1H,  $J_{\text{HH}} = 18.6, 6.1$  Hz,  $=\text{CHCH}_2$ );  $^{13}\text{C}$  NMR ( $\text{CDCl}_3$ ,  $\delta$ , ppm): 3.38 ( $\text{CH}_3$ ), 8.05 ( $\text{CH}_2$ ), 14.02, 22.54, 28.38, 31.40, 36.94, 123.58, 150.60;  $^{29}\text{Si}$  NMR ( $\text{CDCl}_3$ ,  $\delta$ , ppm): -10.13; MS:  $m/z$  (rel. intensity): 59 (17), 85 (13), 87 (14), 95 (17), 97 (16), 99 (25), 113 (14), 127 (12), 155 (62), 182 (20), 183 (100), 184 (16,  $\text{M}^+$ ); anal. calcd. for  $\text{C}_{11}\text{H}_{24}\text{Si}$  (%): C: 71.65, H: 13.12; found: C: 71.70, H: 13.18.

**Product 6**

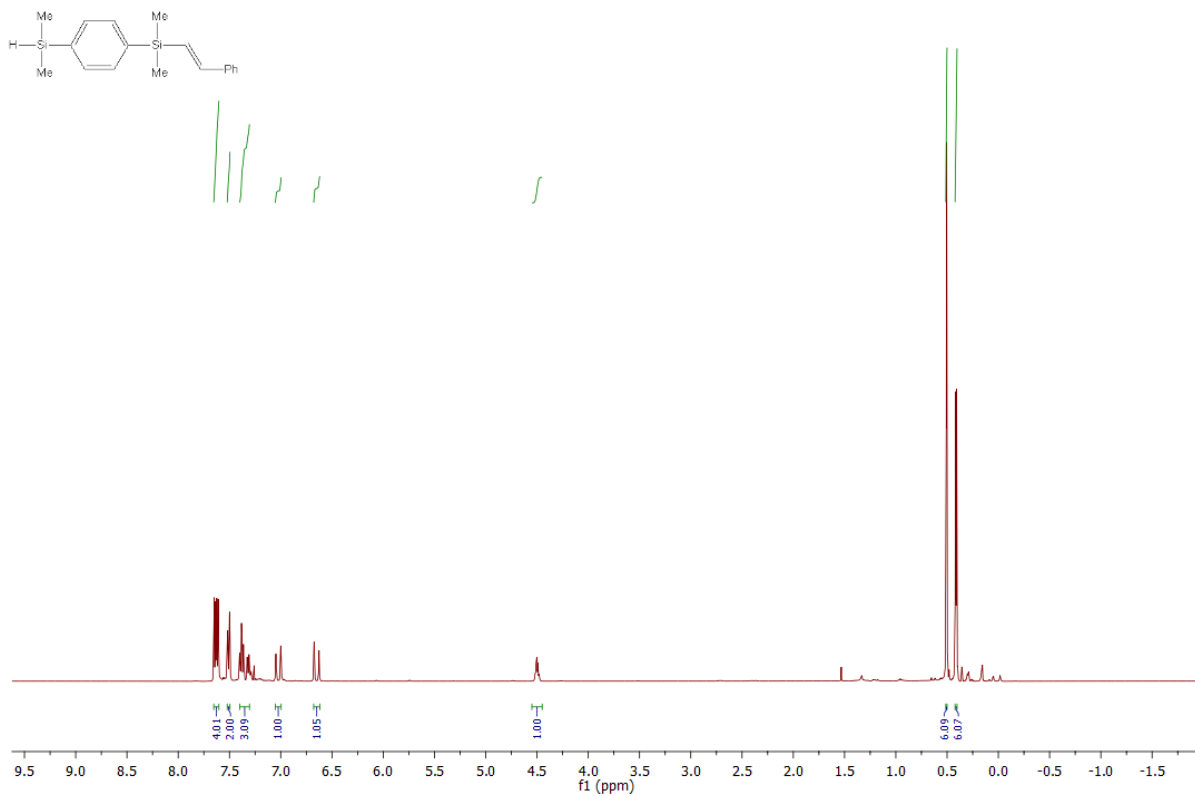

**Figure S10.** <sup>1</sup>H NMR (400 MHz, CDCl<sub>3</sub>) of product 6

**Product 6**

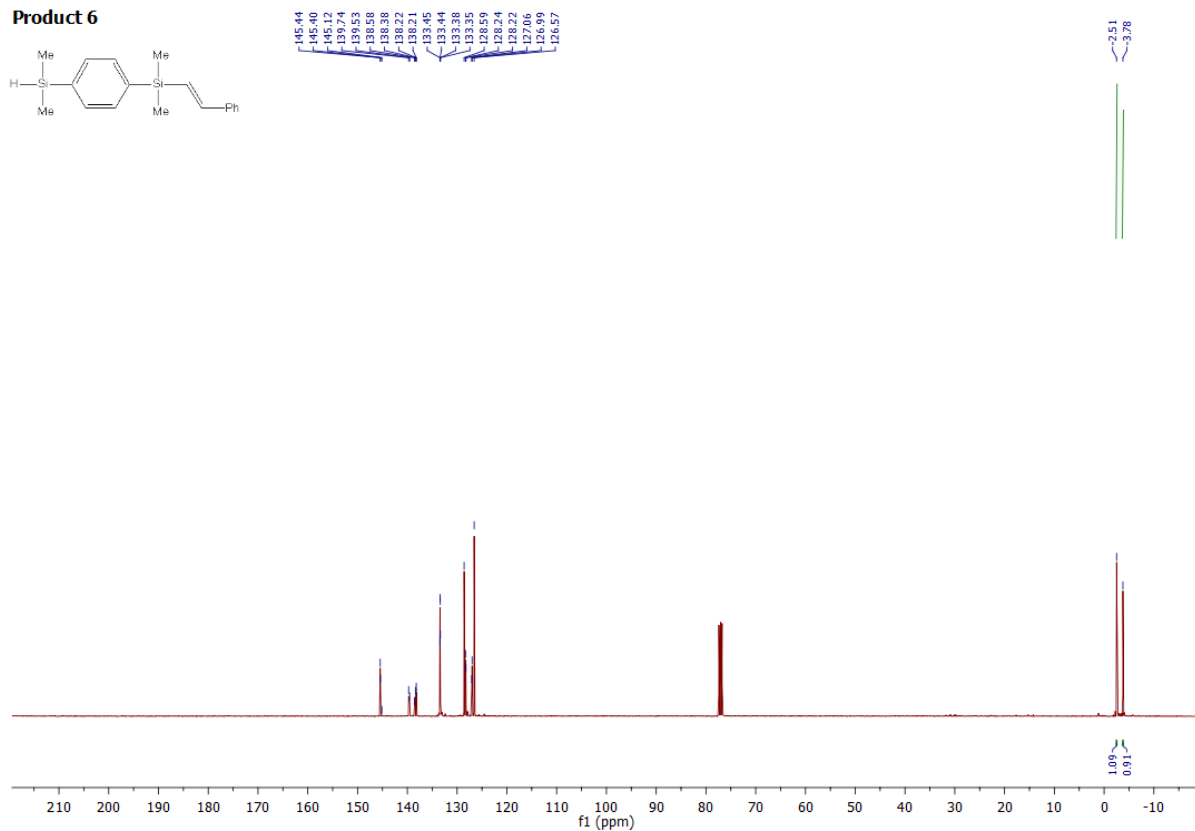

**Figure S11.** <sup>13</sup>C NMR (100 MHz, CDCl<sub>3</sub>) of product 6



**Product 6**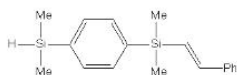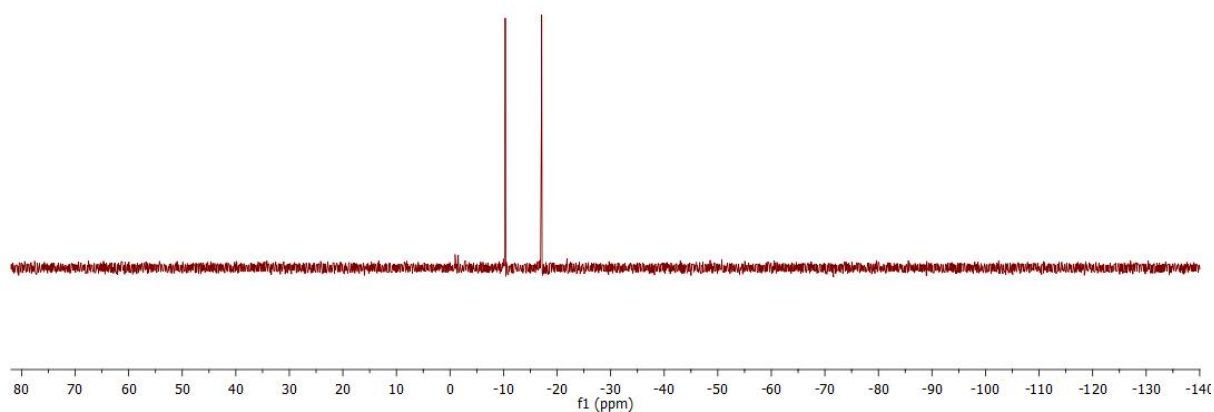

**Figure S12.**  $^{29}\text{Si}$  NMR (79 MHz,  $\text{CDCl}_3$ ) of product **6**

*Analytical data of product 6:*

Isolated yield: 92% (272.4 mg);  $^1\text{H}$  NMR ( $\text{CDCl}_3$ ,  $\delta$ , ppm): 0.41 (d, 6H,  $J_{\text{HH}} = 3.8$  Hz,  $\text{CH}_3$ ), 0.50 (s, 6H,  $\text{CH}_3$ ), 4.47 – 4.53 (m, 1H, SiH), 6.65 (dd, 1H,  $J_{\text{HH}} = 19.1, 1.1$  Hz, =CHSi), 7.02 (d, 1H,  $J_{\text{HH}} = 19.1$  Hz, =CH), 7.28 – 7.40 (m, 3H, Ph), 7.48 – 7.52 (m, 2H, Ph), 7.59 – 7.66 (m, 4H, Ph);  $^{13}\text{C}$  NMR ( $\text{CDCl}_3$ ,  $\delta$ , ppm): -3.78 ( $\text{CH}_3$ ), -2.51 ( $\text{CH}_3$ ), 126.57, 126.99, 127.06, 128.22, 128.24, 128.59, 133.37 (d,  $J = 2.5$  Hz), 133.45 (d,  $J = 1.7$  Hz), 138.22 (d,  $J = 1.7$  Hz), 138.38, 138.58, 139.53, 139.74, 145.40, 145.44;  $^{29}\text{Si}$  NMR ( $\text{CDCl}_3$ ,  $\delta$ , ppm): -10.32, -17.07; MS:  $m/z$  (rel. intensity): 59 (17), 135 (32), 145 (42), 236 (80), 237 (100), 238 (27), 281 (77), 282 (23), 296 (16,  $\text{M}^+$ ); anal. calcd. for  $\text{C}_{18}\text{H}_{24}\text{Si}_2$  (%): C: 72.90, H: 8.16; found: C: 72.81, H: 8.12.

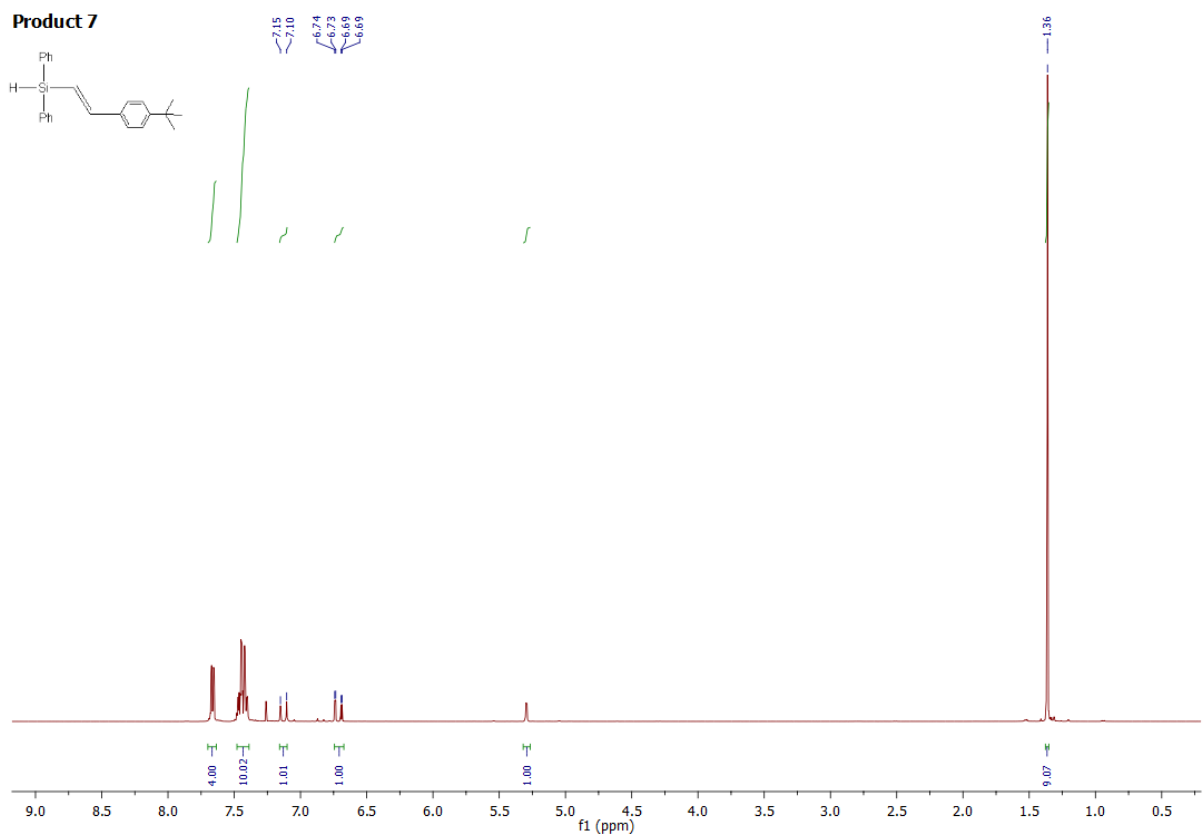

**Figure S13.** <sup>1</sup>H NMR (400 MHz, CDCl<sub>3</sub>) of product 7

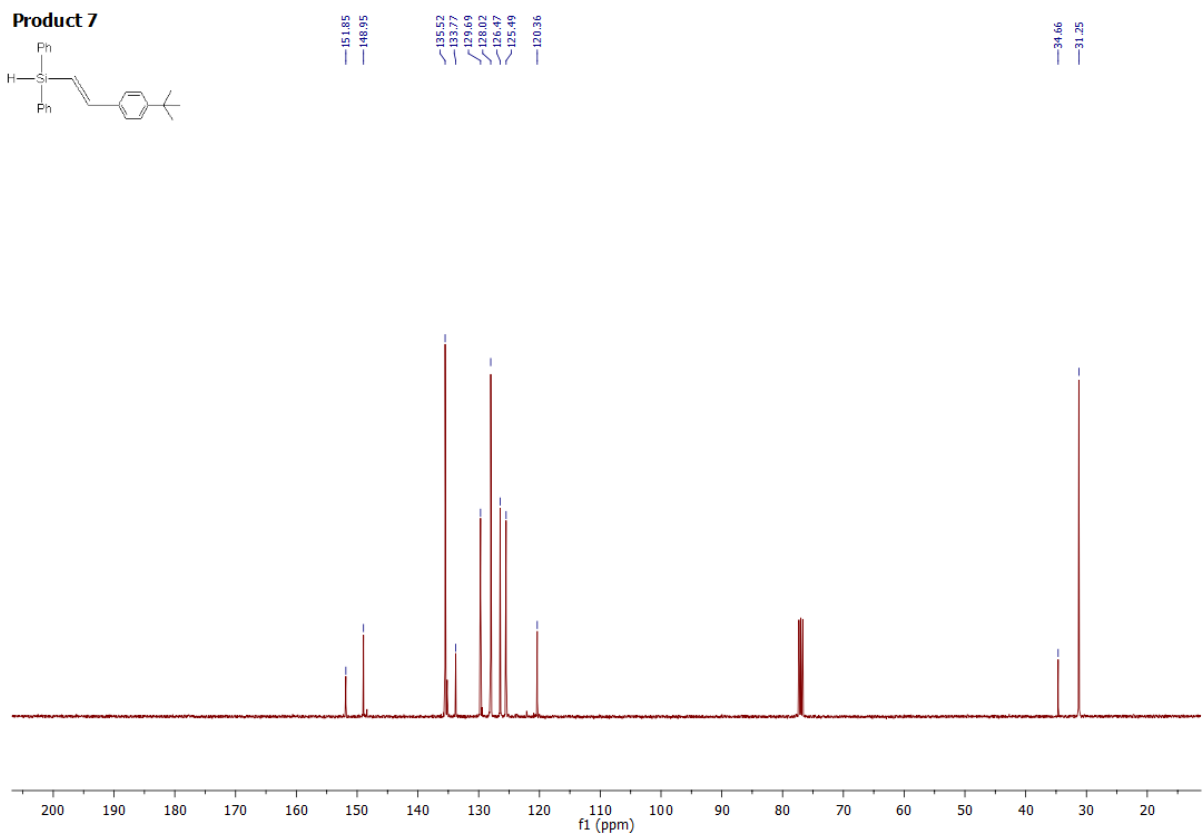

**Figure S14.** <sup>13</sup>C NMR (100 MHz, CDCl<sub>3</sub>) of product 7

**Product 7**

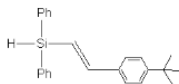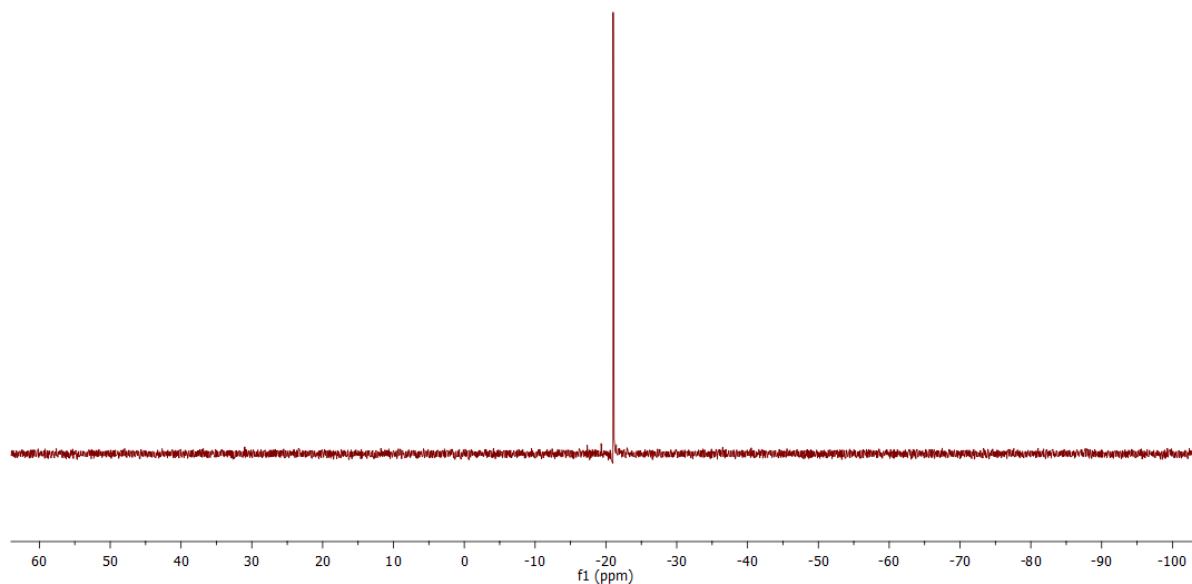

**Figure S15.**  $^{29}\text{Si}$  NMR (79 MHz,  $\text{CDCl}_3$ ) of product **7**

*Analytical data of product 7:*

Isolated yield: 89% ( 304.5 mg);  $^1\text{H}$  NMR ( $\text{CDCl}_3$ ,  $\delta$ , ppm): 1.36 (s, 9H,  $(\text{CH}_3)_3$ ), 5.29 (d, 1H,  $J_{\text{HH}} = 3.2$  Hz, SiH), 6.71 (dd, 1H,  $J_{\text{HH}} = 19.0, 3.3$  Hz, =CHSi), 7.13 (d, 1H,  $J_{\text{HH}} = 19.0$  Hz, =CH), 7.39 – 7.49 (m, 10H,  $-\text{C}_6\text{H}_4-$  and Ph), 7.64 – 7.69 (m, 4H, Ph);  $^{13}\text{C}$  NMR ( $\text{CDCl}_3$ ,  $\delta$ , ppm): 31.25 ( $\text{C}(\text{CH}_3)_3$ ), 34.66 ( $\text{C}(\text{CH}_3)_3$ ), 120.36, 125.49, 126.47, 128.02, 129.69, 133.77, 135.52, 148.95, 151.85;  $^{29}\text{Si}$  NMR ( $\text{CDCl}_3$ ,  $\delta$ , ppm): -21.03; MS:  $m/z$  (rel. intensity): 57 (24), 77 (14), 91 (14), 105 (39), 106 (17), 131 (29), 132 (30), 146 (14), 180 (19), 181 (48), 182 (28), 183 (45), 184 (14), 200 (16), 207 (32), 208 (74), 209 (57), 210 (18), 224 (24), 250 (23), 252 (35), 264 (32), 285 (100), 288 (36), 327 (14), 342 (52,  $\text{M}^+$ ); anal. calcd. for  $\text{C}_{24}\text{H}_{26}\text{Si}$  (%): C: 84.15, H: 7.65; found: C: 84.09, H: 7.55.

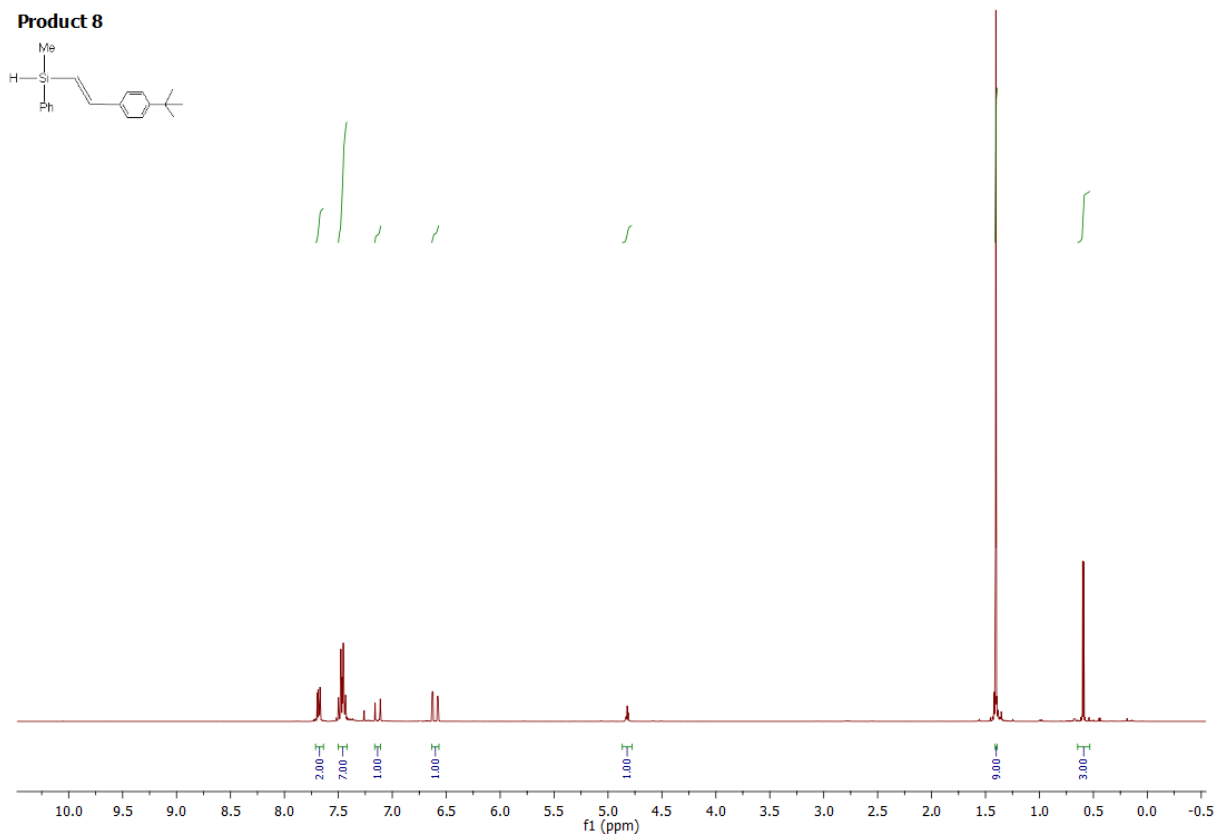

**Figure S16.**  $^1\text{H NMR}$  (400 MHz,  $\text{CDCl}_3$ ) of product **8**

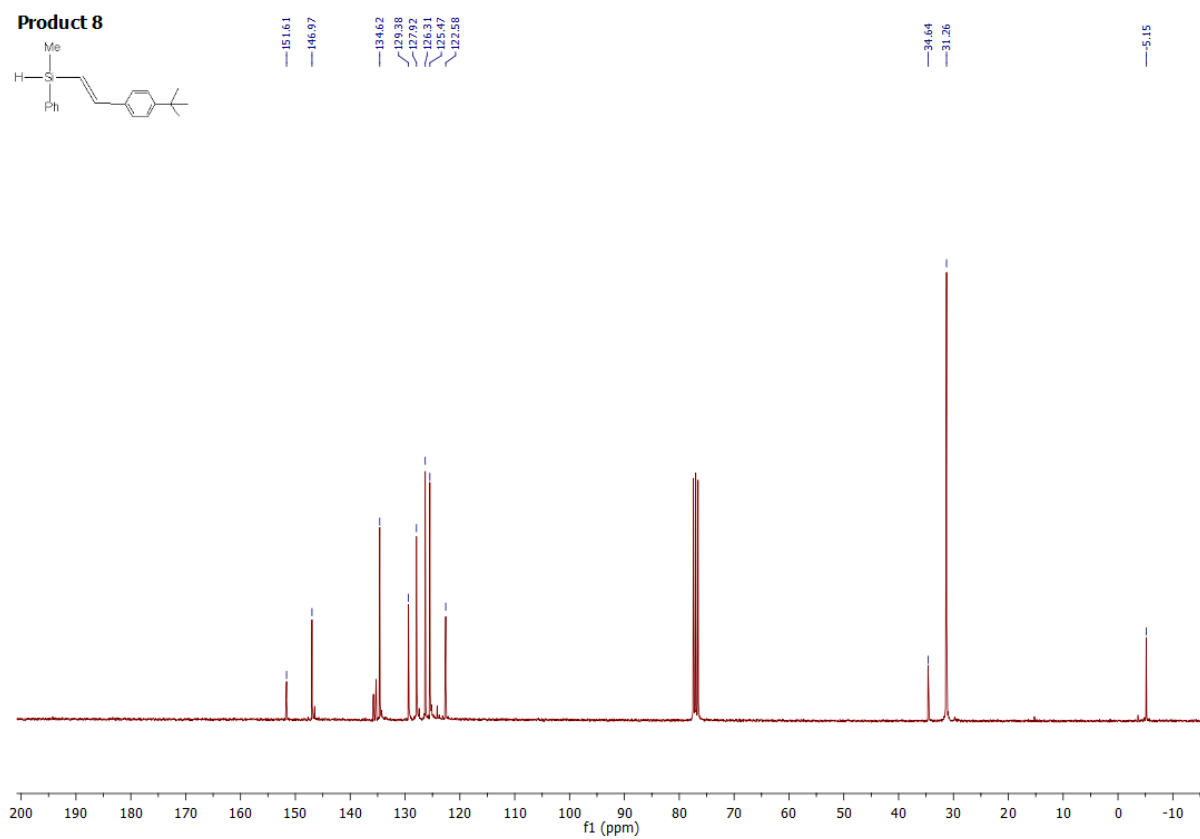

**Figure S17.**  $^{13}\text{C NMR}$  (75 MHz,  $\text{CDCl}_3$ ) of product **8**

**Product 8**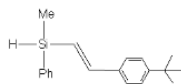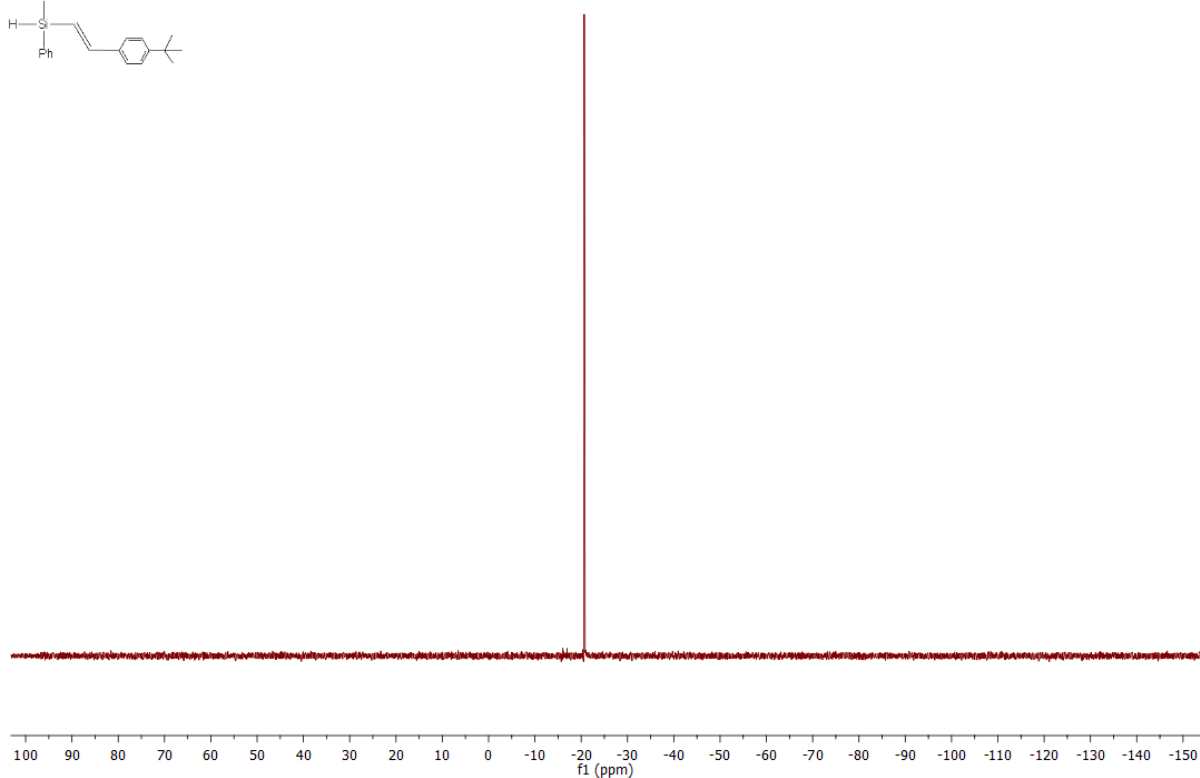

**Figure S18.**  $^{29}\text{Si}$  NMR (79 MHz,  $\text{CDCl}_3$ ) of product **8**

*Analytical data of product 8:*

Isolated yield: 92% (257.7 mg);  $^1\text{H}$  NMR ( $\text{CDCl}_3$ ,  $\delta$ , ppm): 0.59 (d, 3H,  $J_{\text{HH}} = 3.8$  Hz,  $\text{CH}_3$ ), 1.40 (s, 9H,  $(\text{CH}_3)_3$ ), 4.78 – 4.87 (m, 1H, SiH), 6.60 (dd, 1H,  $J_{\text{HH}} = 19.0, 3.3$  Hz, =CHSi), 7.14 (d, 1H,  $J_{\text{HH}} = 19.0$  Hz, =CH), 7.42 – 7.50 (m, 7H,  $-\text{C}_6\text{H}_4-$  and Ph), 7.64 – 7.71 (m, 2H, Ph);  $^{13}\text{C}$  NMR ( $\text{CDCl}_3$ ,  $\delta$ , ppm): -5.15 ( $\text{CH}_3$ ), 31.26 ( $\text{C}(\text{CH}_3)_3$ ), 34.64 ( $\text{C}(\text{CH}_3)_3$ ), 122.58, 125.47, 126.31, 127.92, 129.38, 134.62, 146.97, 151.61;  $^{29}\text{Si}$  NMR ( $\text{CDCl}_3$ ,  $\delta$ , ppm): -20.66; MS:  $m/z$  (rel. intensity): 57 (100), 105 (31), 106 (10), 115 (12), 121 (10), 143 (13), 145 (75), 146 (42), 147 (24), 148 (11), 187 (13), 209 (11), 221 (10), 222 (28), 223 (36), 224 (17), 263 (10), 265 (50), 266 (12), 279 (87), 280 (28,  $\text{M}^+$ ); anal. calcd. for  $\text{C}_{19}\text{H}_{24}\text{Si}$  (%): C: 81.36, H: 8.62; found: C: 81.45, H: 8.72.

**Product 9**

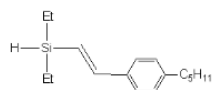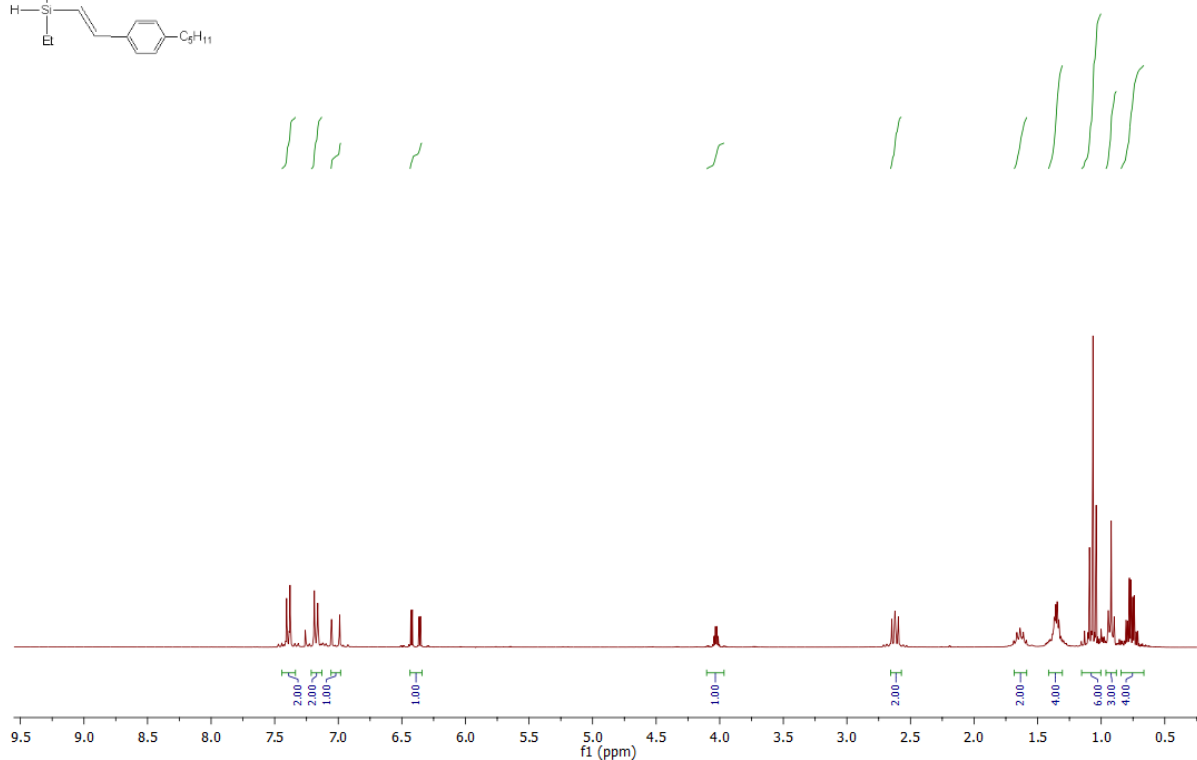

**Figure S19.** <sup>1</sup>H NMR (400 MHz, CDCl<sub>3</sub>) of product 9

**Product 9**

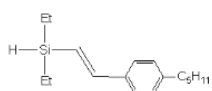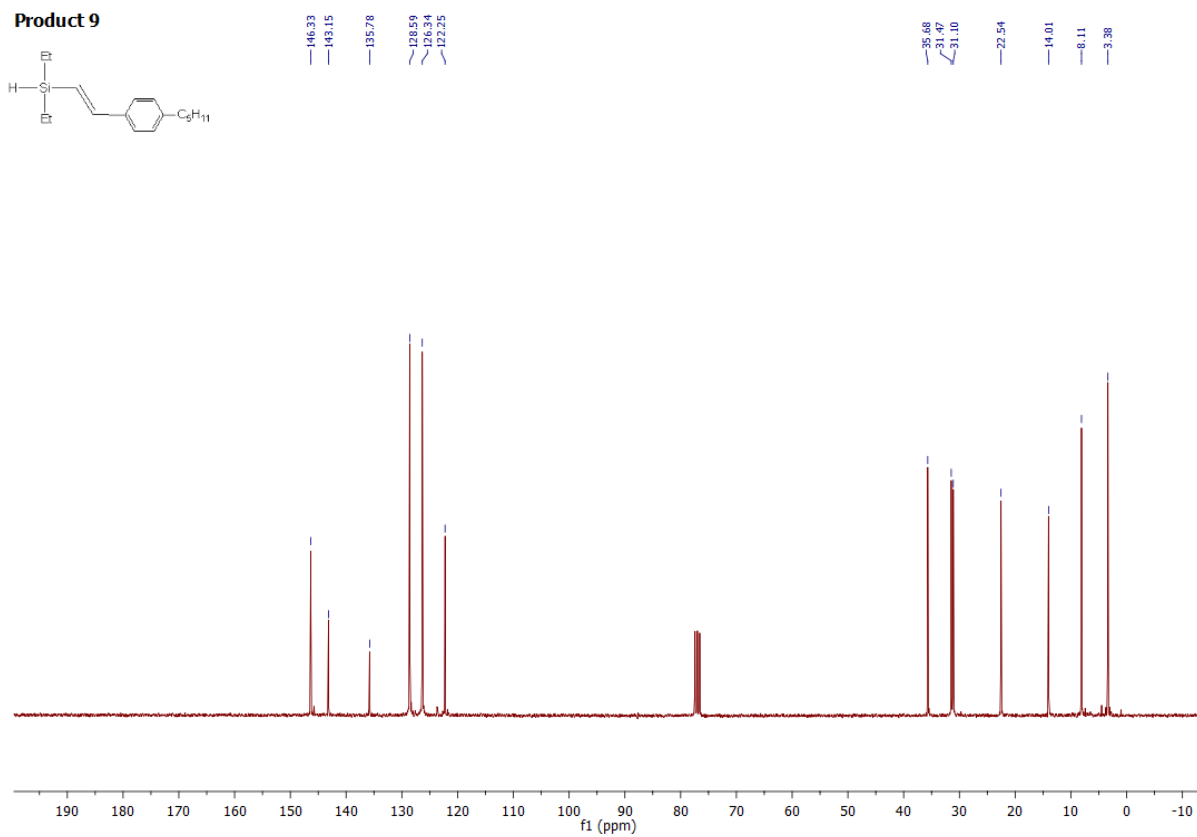

**Figure S20.** <sup>13</sup>C NMR (75 MHz, CDCl<sub>3</sub>) of product 9

**Product 9**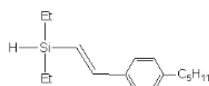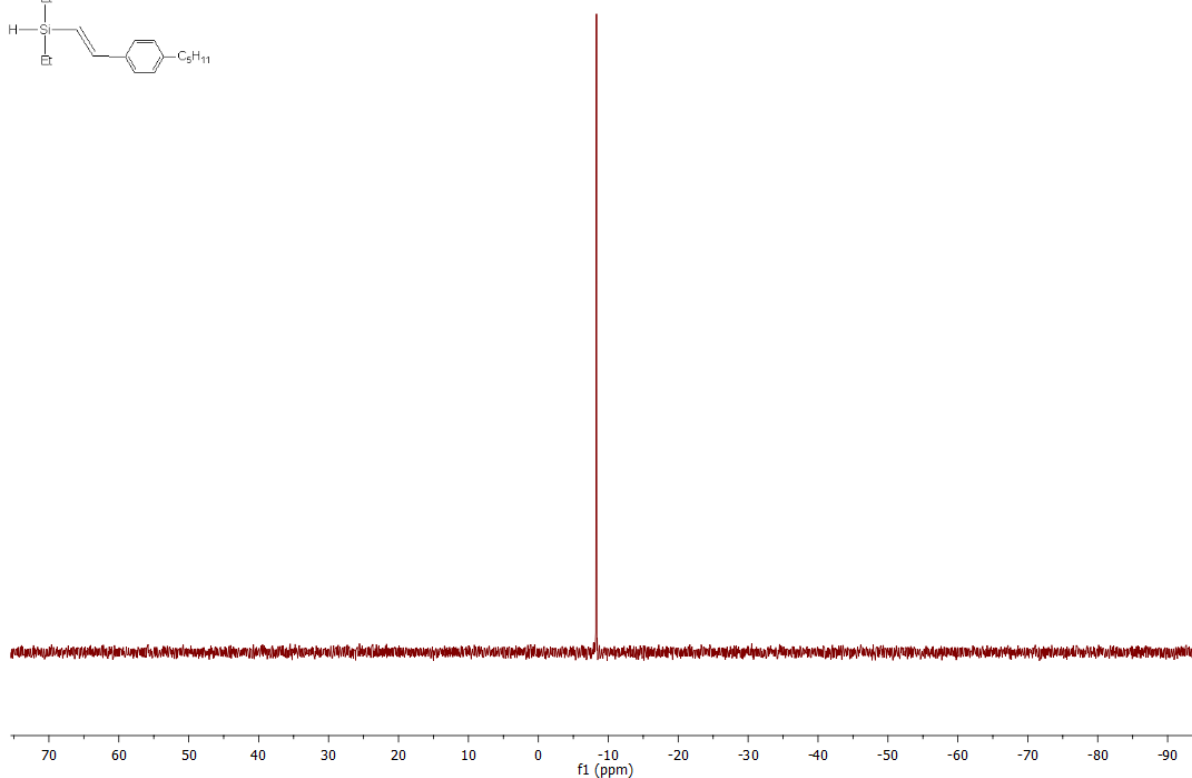

**Figure S21.**  $^{29}\text{Si}$  NMR (79 MHz,  $\text{CDCl}_3$ ) of product **9**

*Analytical data of product 9:*

Isolated yield: 92% (239.4 mg);  $^1\text{H}$  NMR ( $\text{CDCl}_3$ ,  $\delta$ , ppm): 0.66-0.84 (m, 4H,  $\text{CH}_3\text{CH}_2$ -), 0.88–0.96 (m, 3H,  $-(\text{CH}_2)_4\text{CH}_3$ ), 1.00-1.15 (m, 6H,  $\text{CH}_3\text{CH}_2$ -), 1.30–1.41 (m, 4H,  $-(\text{CH}_2)_4\text{CH}_3$ ), 1.59–1.68 (m, 2H,  $-(\text{CH}_2)_4\text{CH}_3$ ), 2.57–2.66 (m, 2H,  $-(\text{CH}_2)_4\text{CH}_3$ ), 4.00–4.10 (m, 1H, SiH), 6.39 (dd, 1H,  $J_{\text{HH}} = 19.1, 3.4$  Hz, =CHSi), 7.02 (d, 1H,  $J_{\text{HH}} = 19.2$  Hz, =CH), 7.17 (d, 2H,  $J_{\text{HH}} = 8.0$  Hz,  $-\text{C}_6\text{H}_4$ -), 7.39 (d, 2H,  $J_{\text{HH}} = 8.0$  Hz,  $-\text{C}_6\text{H}_4$ -);  $^{13}\text{C}$  NMR ( $\text{CDCl}_3$ ,  $\delta$ , ppm): 3.38 ( $\text{CH}_3$ ), 8.11 ( $\text{CH}_2$ ), 14.01, 22.54, 31.10, 31.47, 35.68, 122.25, 126.34, 128.59, 135.78, 143.15, 146.33;  $^{29}\text{Si}$  NMR ( $\text{CDCl}_3$ ,  $\delta$ , ppm): -8.32; MS:  $m/z$  (rel. intensity): 131 (12), 133 (18), 145 (11), 159 (10), 161 (100), 162 (24), 203 (34), 231 (41), 259 (14), 260 (26,  $\text{M}^+$ ); anal. calcd. for  $\text{C}_{17}\text{H}_{28}\text{Si}$  (%): C: 78.38, H: 10.83; found: C: 78.42, H: 10.88.

**Product 10**

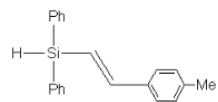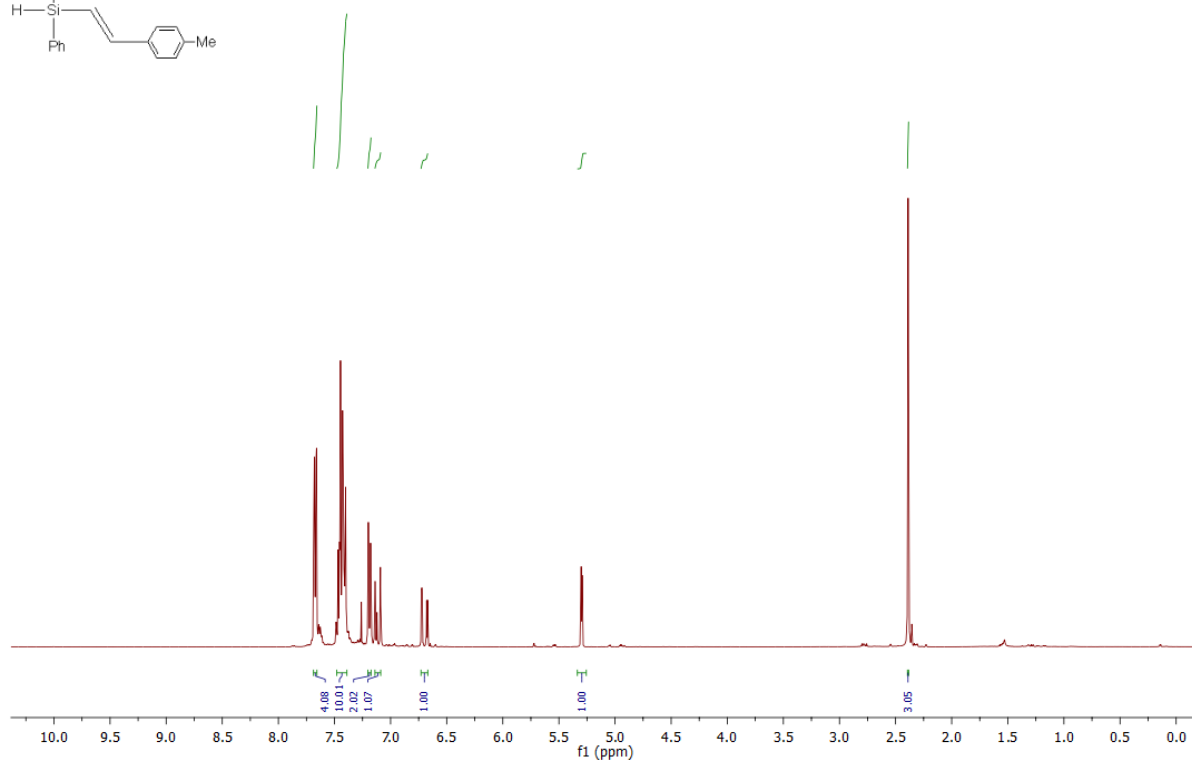

**Figure S22.** <sup>1</sup>H NMR (400 MHz, CDCl<sub>3</sub>) of product **10**

**Product 10**

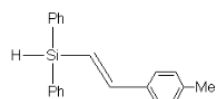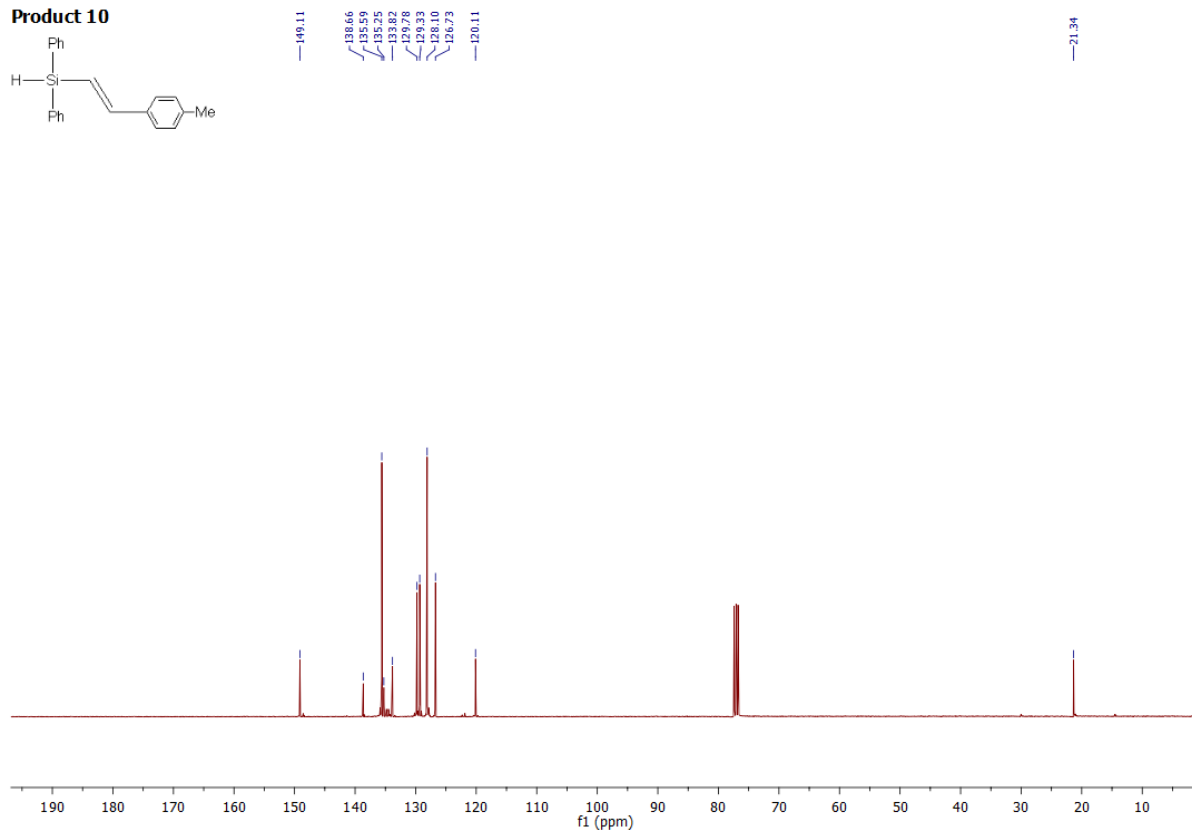

**Figure S23.** <sup>13</sup>C NMR (100 MHz, CDCl<sub>3</sub>) of product **10**



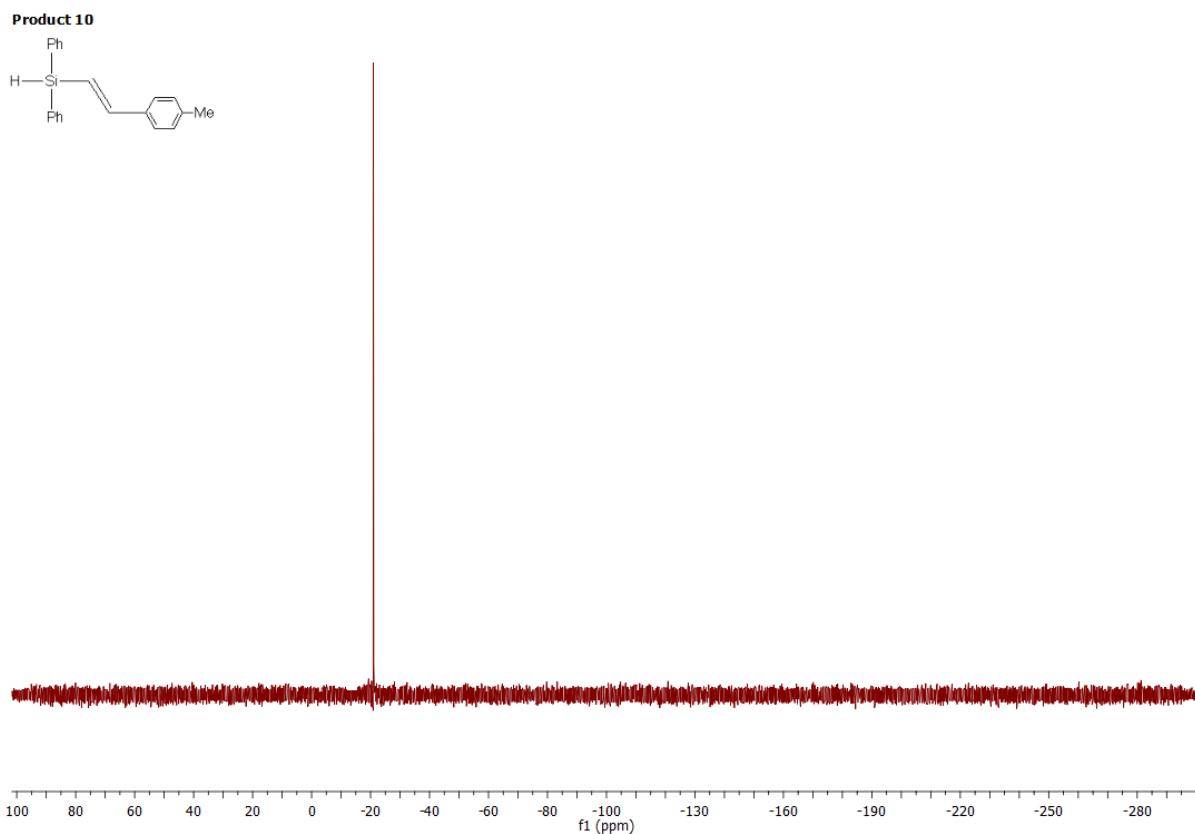

**Figure S24.**  $^{29}\text{Si}$  NMR (79 MHz,  $\text{CDCl}_3$ ) of product **10**

*Analytical data of product 10:*

Isolated yield: 93% (279.1 mg);  $^1\text{H}$  NMR ( $\text{CDCl}_3$ ,  $\delta$ , ppm): 2.39 (s, 3H,  $\text{CH}_3$ ), 5.30 (d, 1H,  $J_{\text{HH}} = 3.2$  Hz,  $\text{SiH}$ ), 6.70 (dd, 1H,  $J_{\text{HH}} = 19.0, 3.2$  Hz,  $=\text{CHSi}$ ), 7.11 (d, 2H,  $J_{\text{HH}} = 19.1$  Hz,  $=\text{CH}$ ), 7.39 – 7.48 (m, 10H,  $-\text{C}_6\text{H}_4-$  and Ph), 7.66 – 7.69 (m, 4H, Ph);  $^{13}\text{C}$  NMR ( $\text{CDCl}_3$ ,  $\delta$ , ppm): 21.34 ( $\text{CH}_3$ ), 120.11, 126.73, 128.10, 129.33, 129.78, 133.82, 135.25, 135.59, 138.66, 149.11;  $^{29}\text{Si}$  NMR ( $\text{CDCl}_3$ ,  $\delta$ , ppm): -20.96; MS:  $m/z$  (rel. intensity): 53 (12), 78 (10), 105 (22), 106 (10), 180 (14), 181 (40), 182 (18), 195 (11), 196 (12), 207 (12), 208 (24), 221 (26), 222 (81), 223 (48), 224 (16), 299 (29), 300 (100,  $\text{M}^+$ ).

**Product 11**

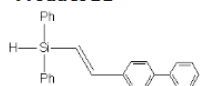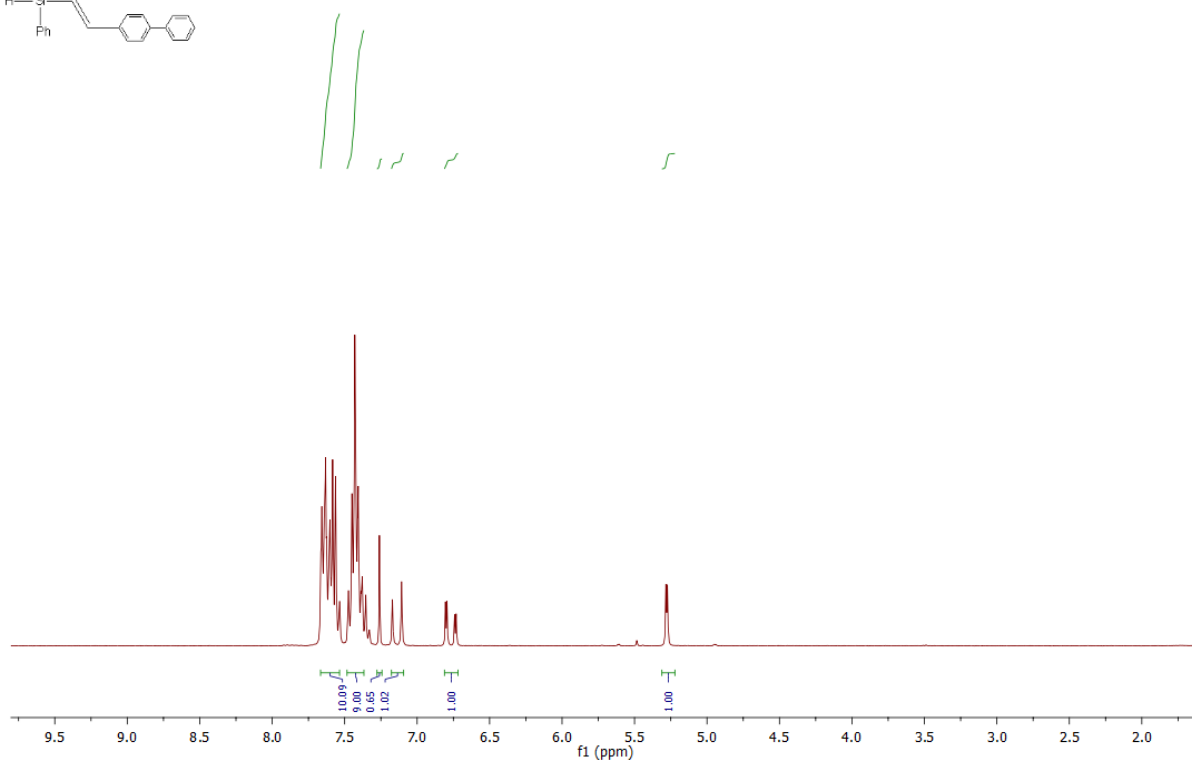

**Figure S25.** <sup>1</sup>H NMR (300 MHz, CDCl<sub>3</sub>) of product **11**

**Product 11**

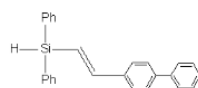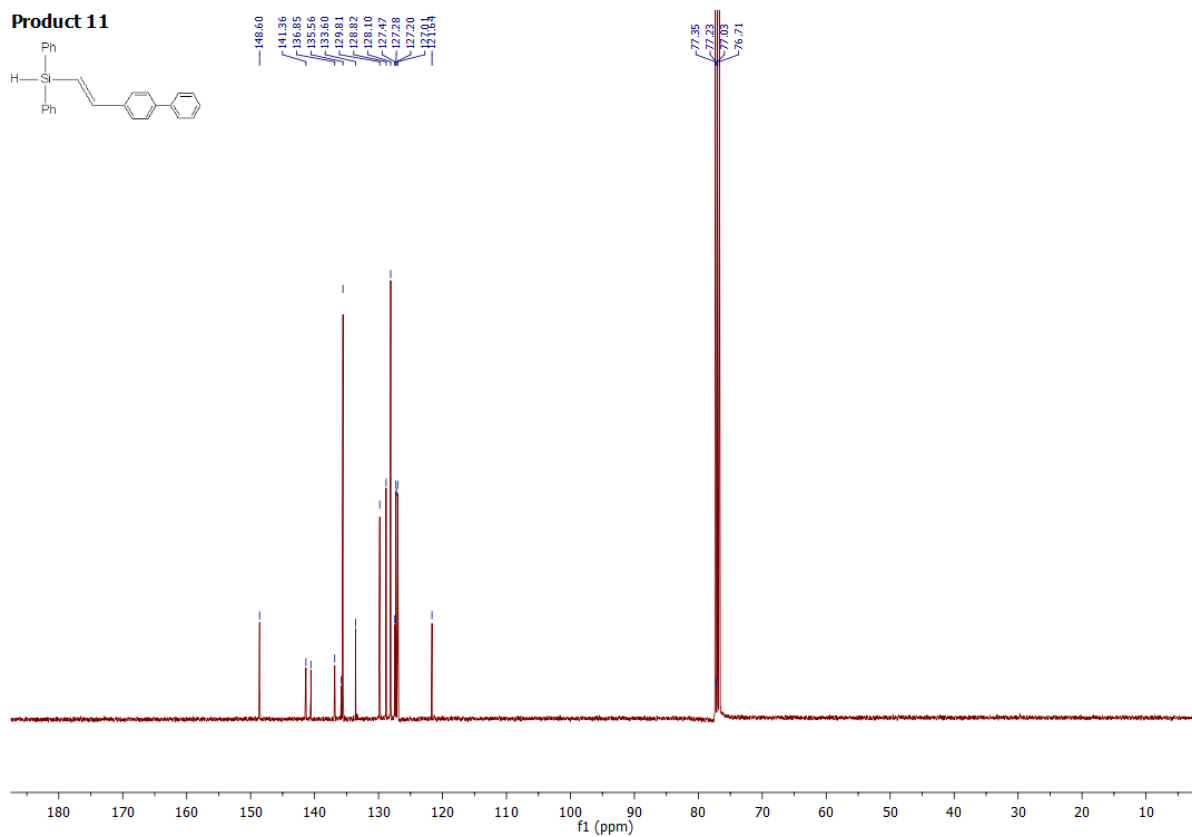

**Figure S26.** <sup>13</sup>C NMR (100 MHz, CDCl<sub>3</sub>) of product **11**

**Product 11**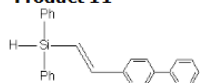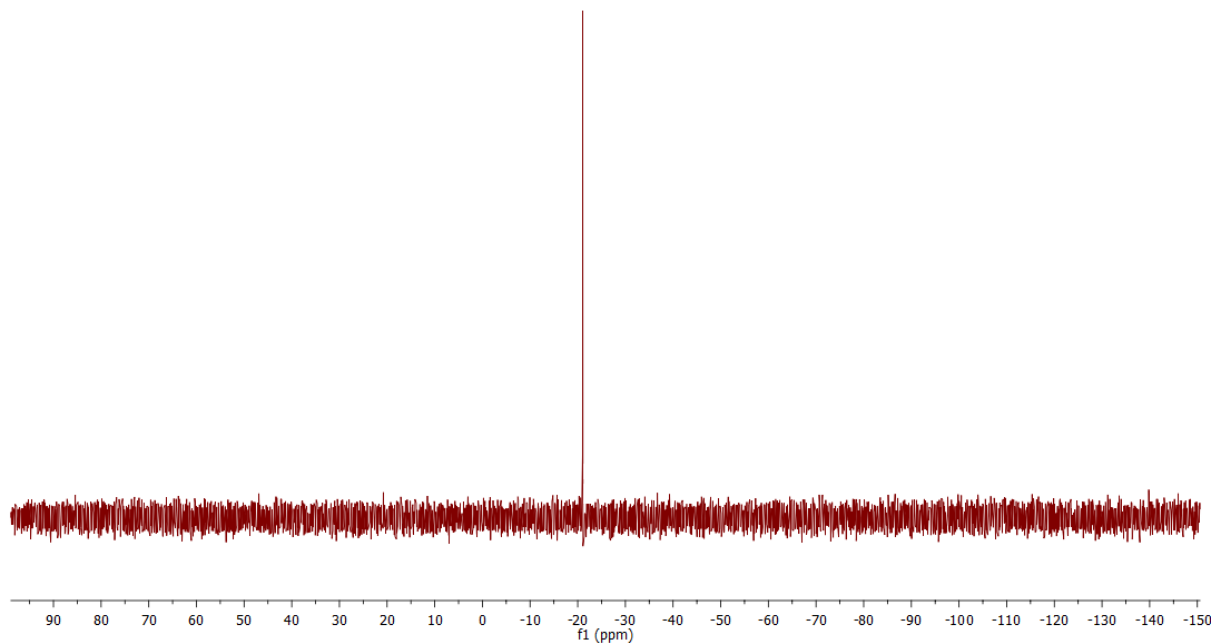

**Figure S27.**  $^{29}\text{Si}$  NMR (79 MHz,  $\text{CDCl}_3$ ) of product **11**

*Analytical data of product 11:*

Isolated yield: 89% (325 mg);  $^1\text{H}$  NMR ( $\text{CDCl}_3$ ,  $\delta$ , ppm): 5.28 (d, 1H,  $J_{\text{HH}} = 3.2$  Hz, SiH), 6.77 (dd, 1H,  $J_{\text{HH}} = 19.0, 3.2$  Hz, =CHSi), 7.14 (d, 1H,  $J_{\text{HH}} = 19.0$  Hz, =CH), 7.37 – 7.48 (m, 10H, Ar), 7.53 – 7.68 (m, 9H, Ar);  $^{13}\text{C}$  NMR ( $\text{CDCl}_3$ ,  $\delta$ , ppm): 121.64, 127.01, 127.20, 127.28, 127.47, 128.10, 128.82, 129.81, 133.60, 135.56, 135.82, 136.85, 140.58, 141.36, 148.60;  $^{29}\text{Si}$  NMR ( $\text{CDCl}_3$ ,  $\delta$ , ppm): -21.15; MS:  $m/z$  (rel. intensity): 105 (15), 181 (32), 206 (20), 208 (17), 284 (95), 286 (46), 362 (100,  $\text{M}^+$ ); anal. calcd. for  $\text{C}_{26}\text{H}_{22}\text{Si}$  (%): C: 86.14, H: 6.12; found: C: 86.22, H: 6.20.

**Product 12**

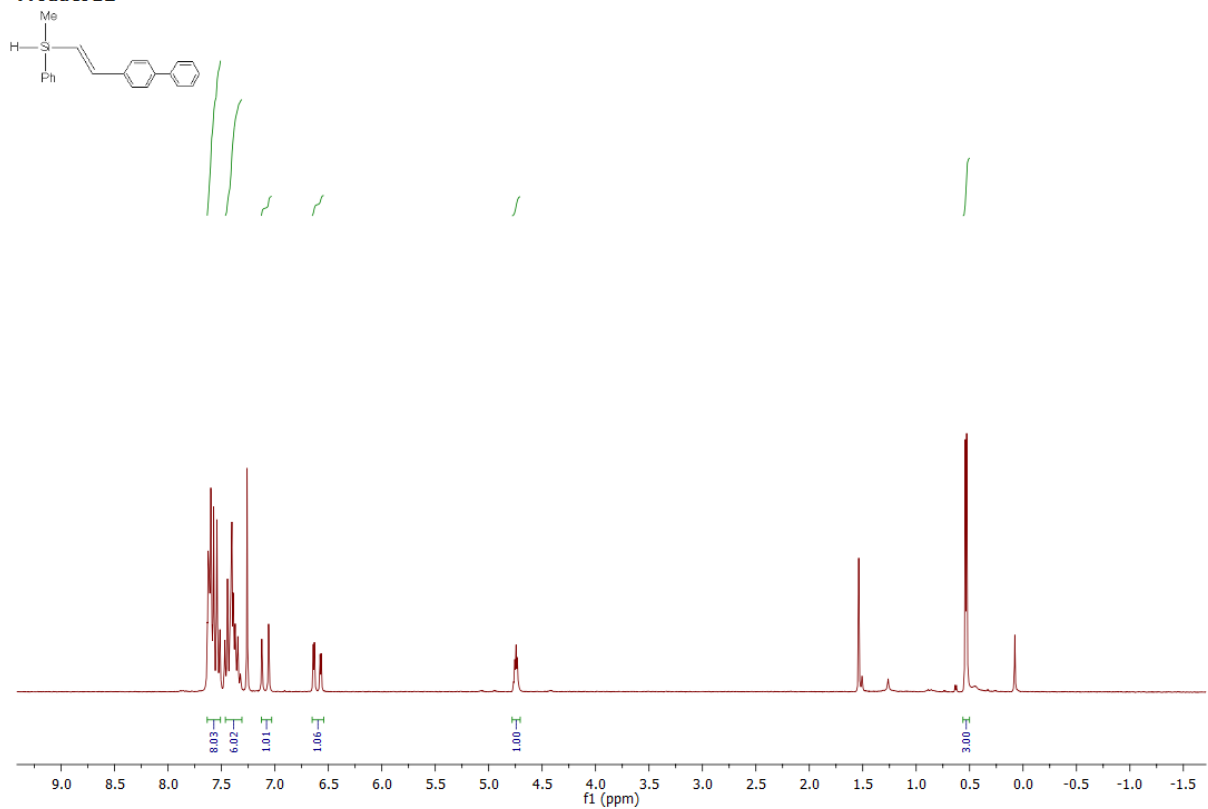

**Figure S28.** <sup>1</sup>H NMR (300 MHz, CDCl<sub>3</sub>) of product **12**

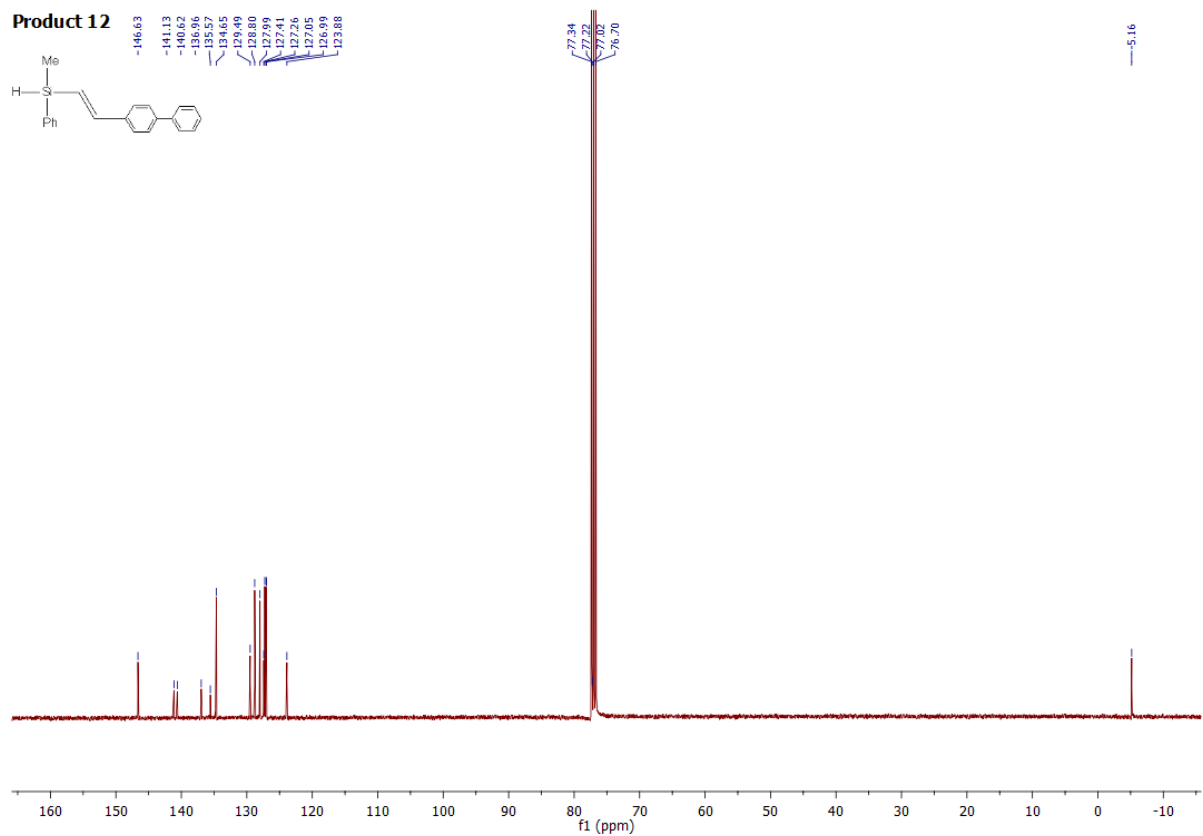

**Figure S29.** <sup>13</sup>C NMR (100 MHz, CDCl<sub>3</sub>) of product **12**

**Product 12**

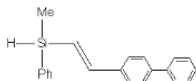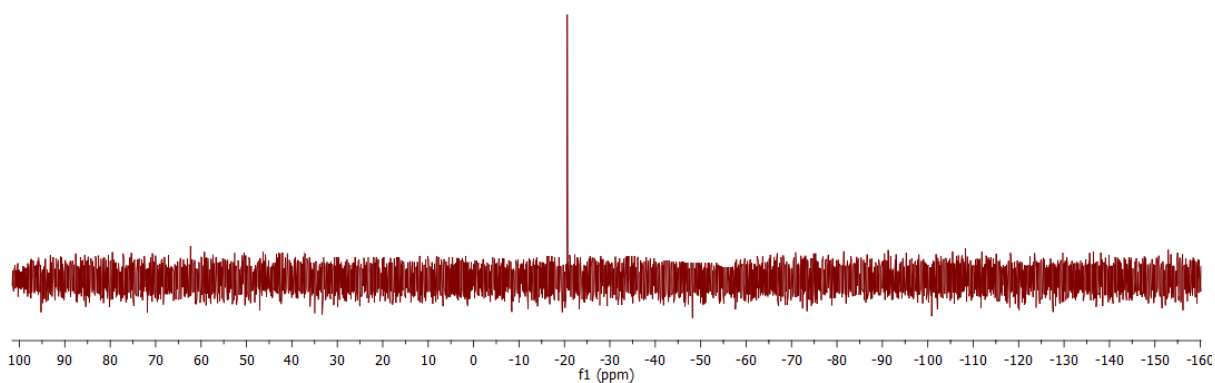

**Figure S30.**  $^{29}\text{Si}$  NMR (79 MHz,  $\text{CDCl}_3$ ) of product **12**

*Analytical data of product 12:*

Isolated yield: 87% (261.1 mg);  $^1\text{H}$  NMR ( $\text{CDCl}_3$ ,  $\delta$ , ppm): 0.53 (d, 3H,  $J_{\text{HH}} = 3.8$  Hz,  $\text{CH}_3$ ), 4.71-4.78 (m, 1H,  $\text{SiH}$ ), 6.60 (dd, 1H,  $J_{\text{HH}} = 19.0, 3.0$  Hz,  $=\text{CHSi}$ ), 7.09 (d, 1H,  $J_{\text{HH}} = 19.0$  Hz,  $=\text{CH}$ ), 7.31 – 7.46 (m, 6H, Ar), 7.50 – 7.63 (m, 8H, Ar);  $^{13}\text{C}$  NMR ( $\text{CDCl}_3$ ,  $\delta$ , ppm): -5.16, 123.88, 126.99, 127.05, 127.26, 127.41, 127.99, 128.80, 129.49, 134.65, 135.57, 136.96, 140.62, 141.13, 146.63;  $^{29}\text{Si}$  NMR ( $\text{CDCl}_3$ ,  $\delta$ , ppm): -20.63; MS:  $m/z$  (rel. intensity): 105 (14), 121 (20), 146 (12), 178 (15), 222 (22), 223 (10), 285 (92), 286 (25), 299 (13), 300 (100,  $\text{M}^+$ ); anal. calcd. for  $\text{C}_{21}\text{H}_{20}\text{Si}$  (%): C: 83.94, H: 6.71; found: C: 83.99, H: 6.80.

**Product 13**

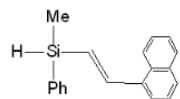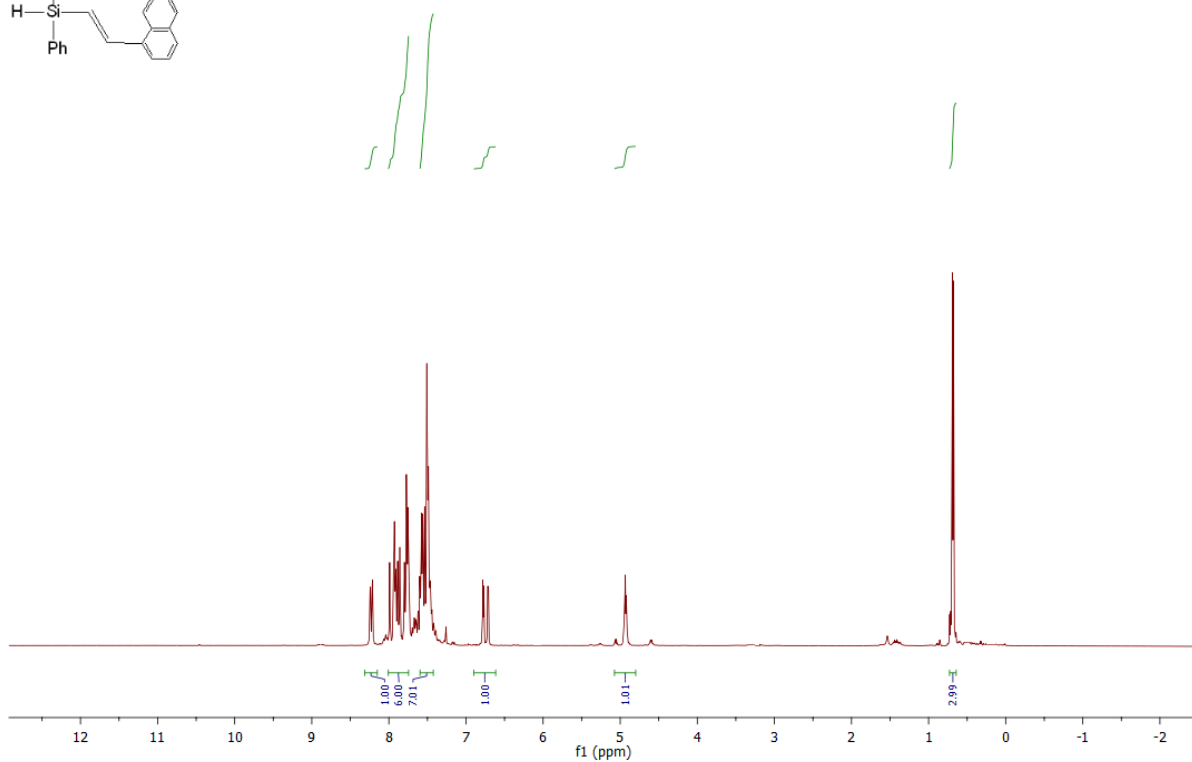

**Figure S31.** <sup>1</sup>H NMR (300 MHz, CDCl<sub>3</sub>) of product **13**

**Product 13**

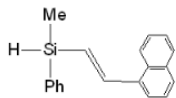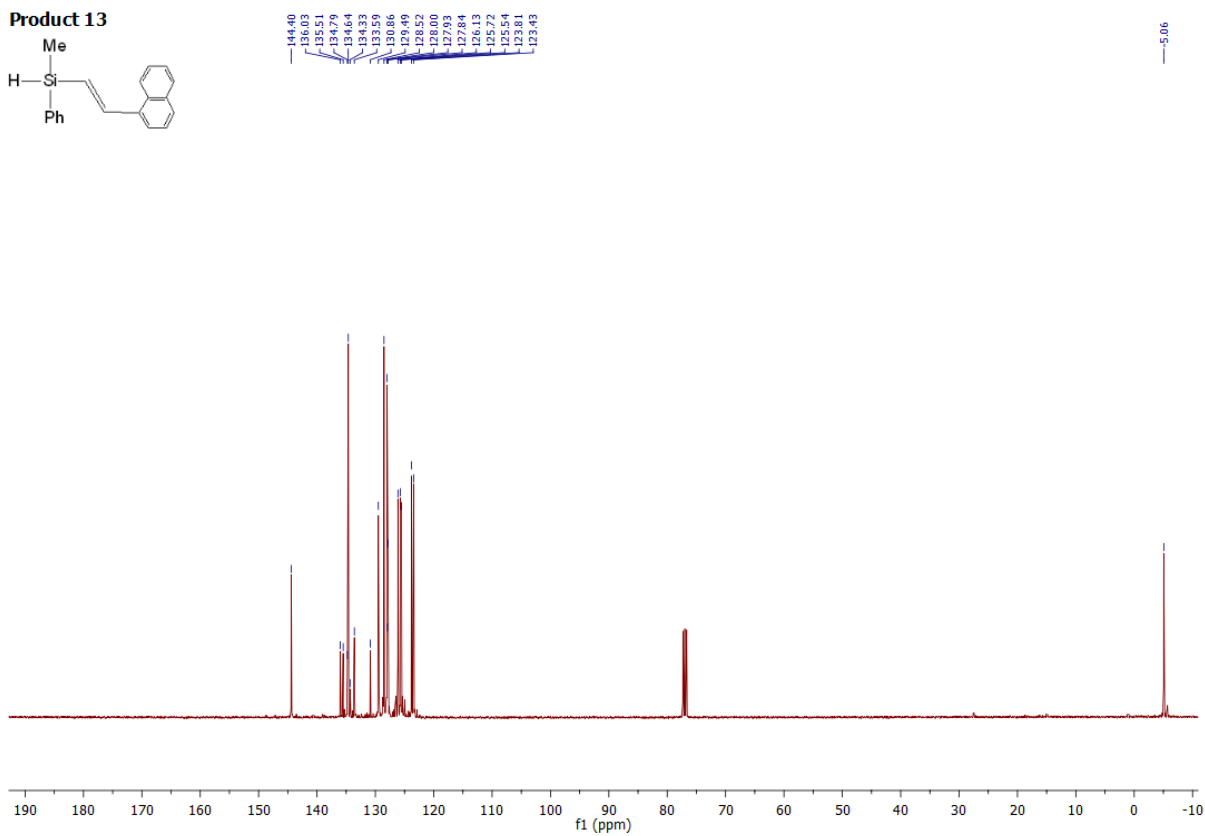

**Figure S32.** <sup>13</sup>C NMR (100 MHz, CDCl<sub>3</sub>) of product **13**

**Product 13**

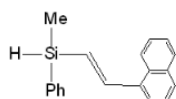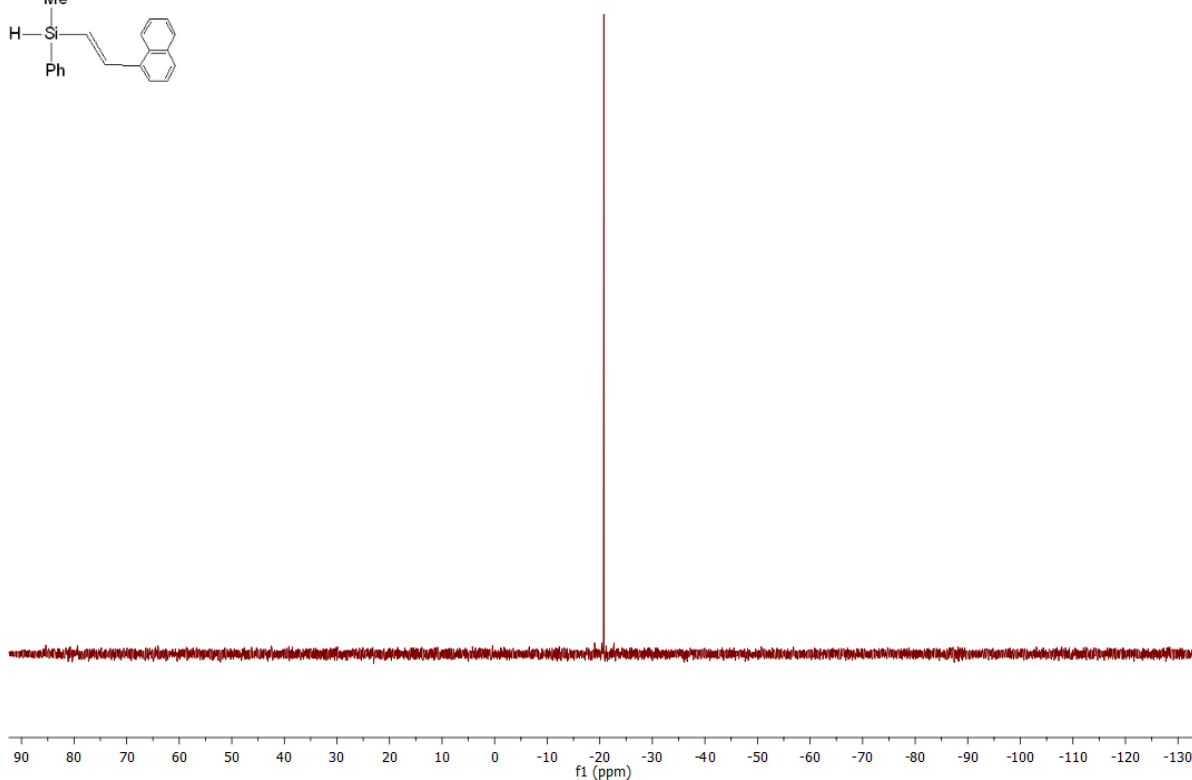

**Figure S33.**  $^{29}\text{Si}$  NMR (79 MHz,  $\text{CDCl}_3$ ) of product **13**

*Analytical data of product 13:*

Isolated yield: 89% (244 mg);  $^1\text{H}$  NMR ( $\text{CDCl}_3$ ,  $\delta$ , ppm): 0.68 (d, 3H,  $J_{\text{HH}} = 3.8$  Hz,  $\text{CH}_3$ ), 4.92 – 4.95 (m, 1H,  $\text{SiH}$ ), 6.75 (dd, 1H,  $J_{\text{HH}} = 18.8, 3.0$  Hz,  $=\text{CHSi}$ ), 7.42 – 7.60 (m, 7H,  $=\text{CH}$  and Ar), 7.74 – 8.01 (m, 6H, Ar), 8.23 (d, 1H,  $J_{\text{HH}} = 7.7$  Hz, Ar);  $^{13}\text{C}$  NMR ( $\text{CDCl}_3$ ,  $\delta$ , ppm): -5.06, 123.43, 123.81, 125.54, 125.72, 126.13, 127.84, 127.93, 128.00, 128.52, 129.49, 130.86, 133.59, 134.33, 134.64, 134.79, 135.51, 136.03, 144.40;  $^{29}\text{Si}$  NMR ( $\text{CDCl}_3$ ,  $\delta$ , ppm): -20.77; MS:  $m/z$  (rel. intensity): 105 (15), 152 (14), 181 (26), 195 (27), 196 (24), 197 (11), 259 (87), 260 (29), 273 (28), 274 (100,  $\text{M}^+$ ); anal. calcd. for  $\text{C}_{19}\text{H}_{18}\text{Si}$  (%): C: 83.15, H: 6.01; found: C: 83.29, H: 6.22.

**Product 14**

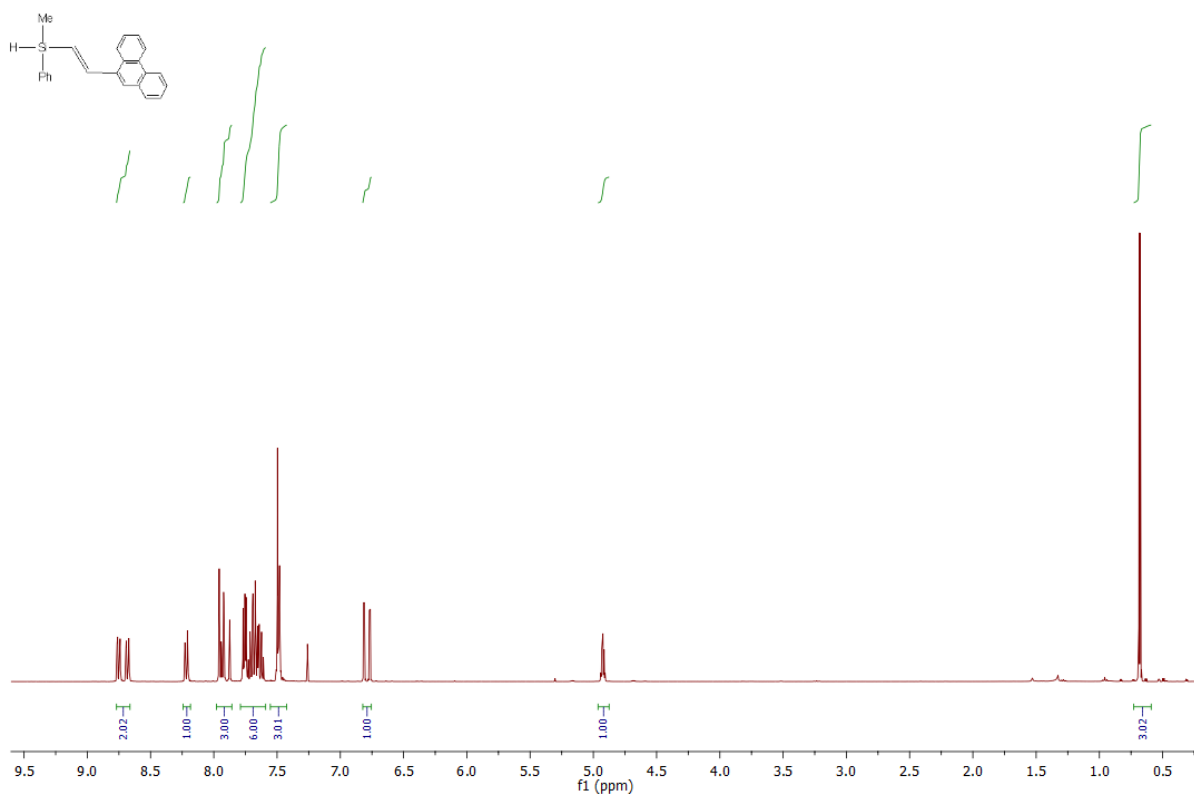

**Figure S34.** <sup>1</sup>H NMR (300 MHz, CDCl<sub>3</sub>) of product **14**

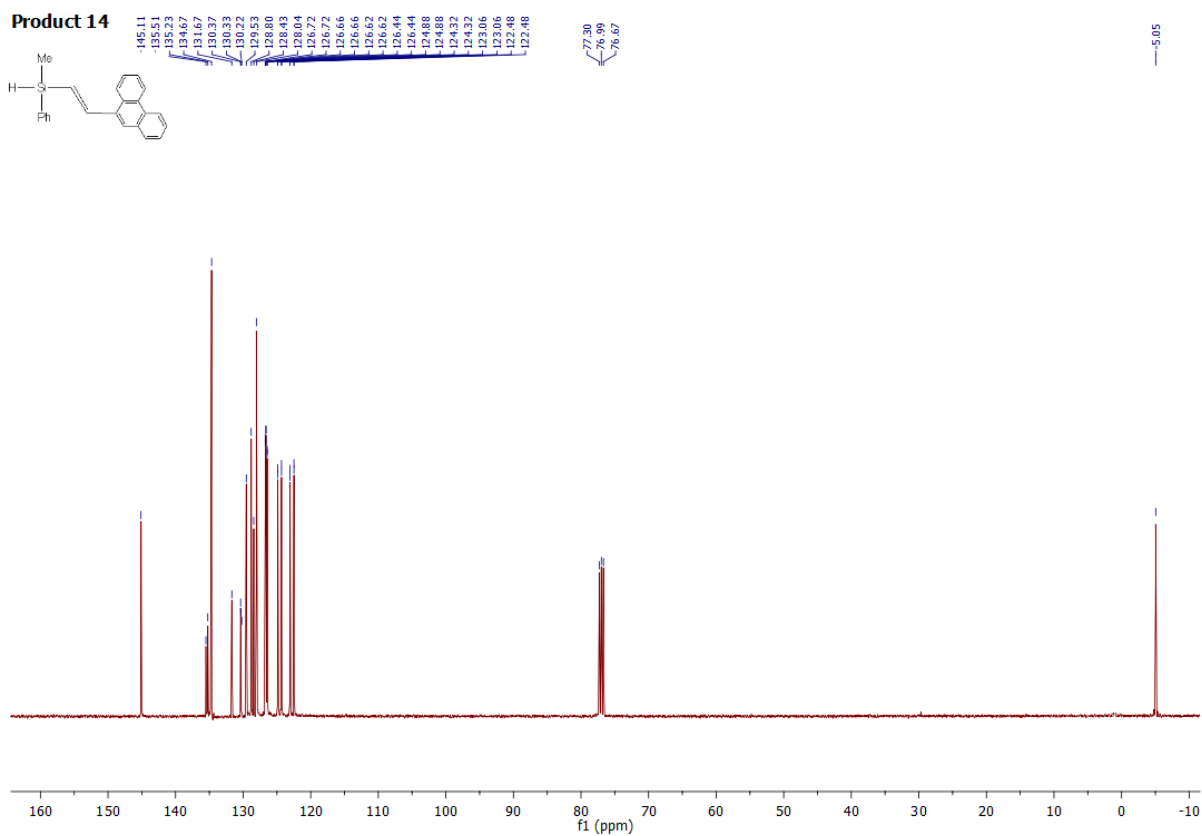

**Figure S35.** <sup>13</sup>C NMR (100 MHz, CDCl<sub>3</sub>) of product **14**



**Product 14**

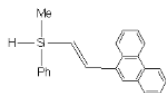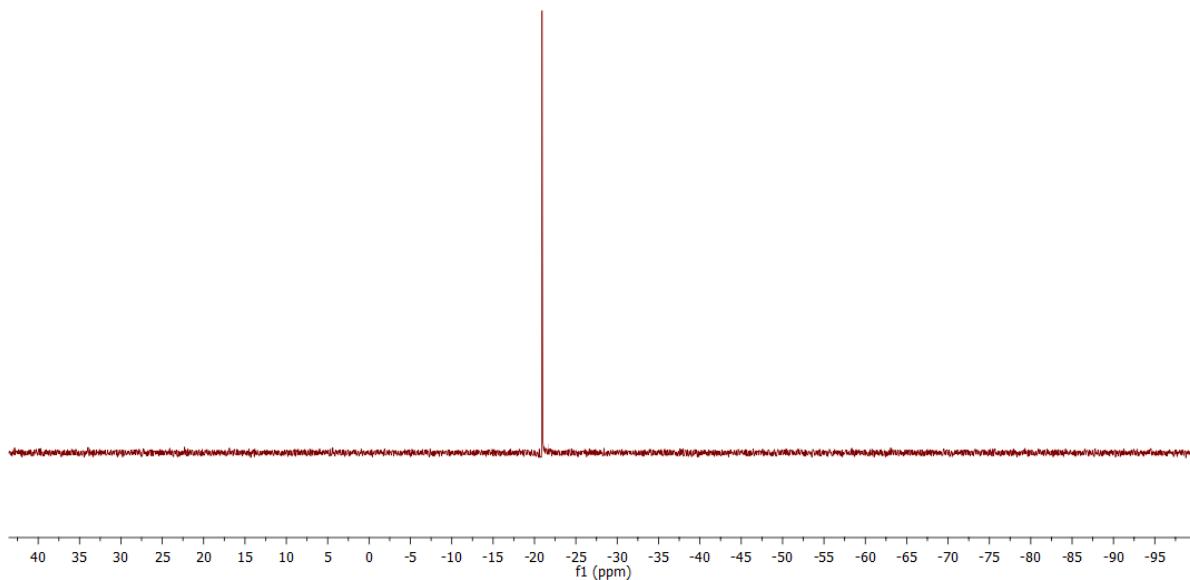

**Figure S36.**  $^{29}\text{Si}$  NMR (79 MHz,  $\text{CDCl}_3$ ) of product **14**

*Analytical data of product 14:*

Isolated yield: 87% (282 mg);  $^1\text{H}$  NMR ( $\text{CDCl}_3$ ,  $\delta$ , ppm): 0.68 (d, 3H,  $J_{\text{HH}} = 3.8$  Hz,  $\text{CH}_3$ ), 4.88 – 4.97 (m, 1H, SiH), 6.79 (dd, 1H,  $J_{\text{HH}} = 18.7, 3.0$  Hz, =CHSi), 7.42 – 7.55 (m, 3H, Ar), 7.59 – 7.79 (m, 6H, Ar), 7.86 – 7.98 (m, 3H, =CH and Ar), 8.18 – 8.24 (m, 1H, Ar), 8.67 – 8.77 (m, 2H, Ar);  $^{13}\text{C}$  NMR ( $\text{CDCl}_3$ ,  $\delta$ , ppm): -5.05 ( $\text{CH}_3$ ), 122.48, 123.06, 124.32, 124.88, 126.44, 126.64 (d,  $J = 3.7$  Hz), 126.72, 128.04, 128.43, 128.80, 129.53, 130.22, 130.33, 130.37, 131.67, 134.67, 135.23, 135.51, 145.11;  $^{29}\text{Si}$  NMR ( $\text{CDCl}_3$ ,  $\delta$ , ppm): -20.91; MS:  $m/z$  (rel. intensity): 105 (10), 231 (14), 246 (10), 309 (98), 310 (37), 324 (100,  $\text{M}^+$ ); anal. calcd. for  $\text{C}_{23}\text{H}_{20}\text{Si}$  (%): C: 85.13, H: 6.21; found: C: 85.30, H: 6.42.

Product 15

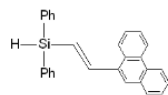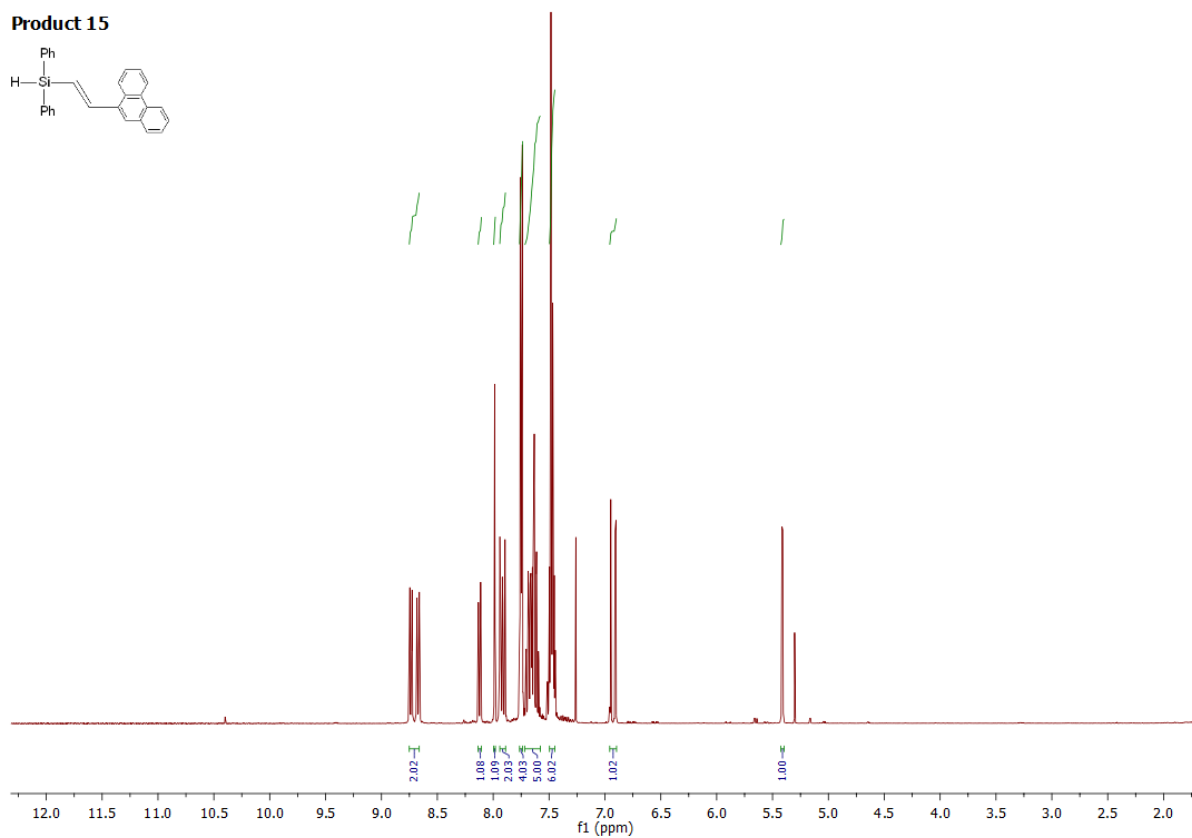

Figure S37. <sup>1</sup>H NMR (400 MHz, CDCl<sub>3</sub>) of product 15

Product 15

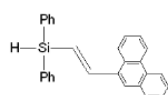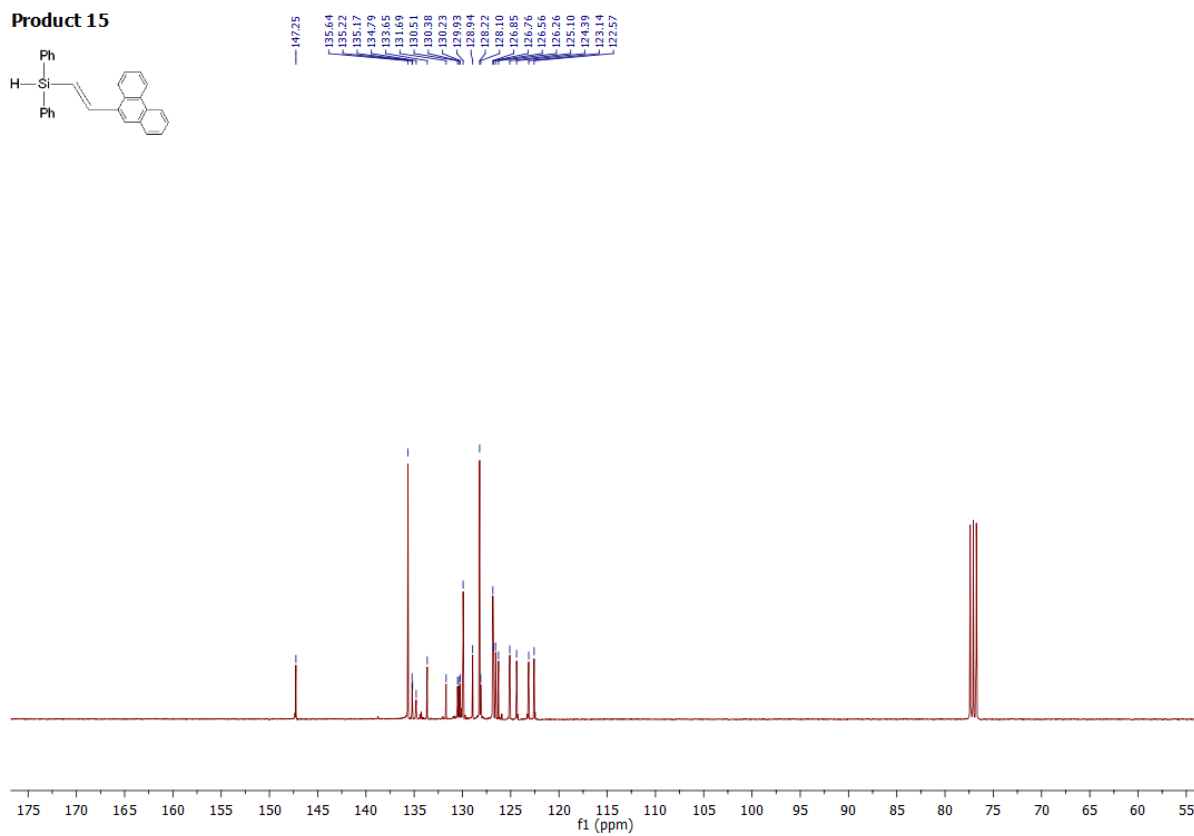

Figure S38. <sup>13</sup>C NMR (100 MHz, CDCl<sub>3</sub>) of product 15

**Product 15**

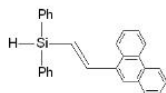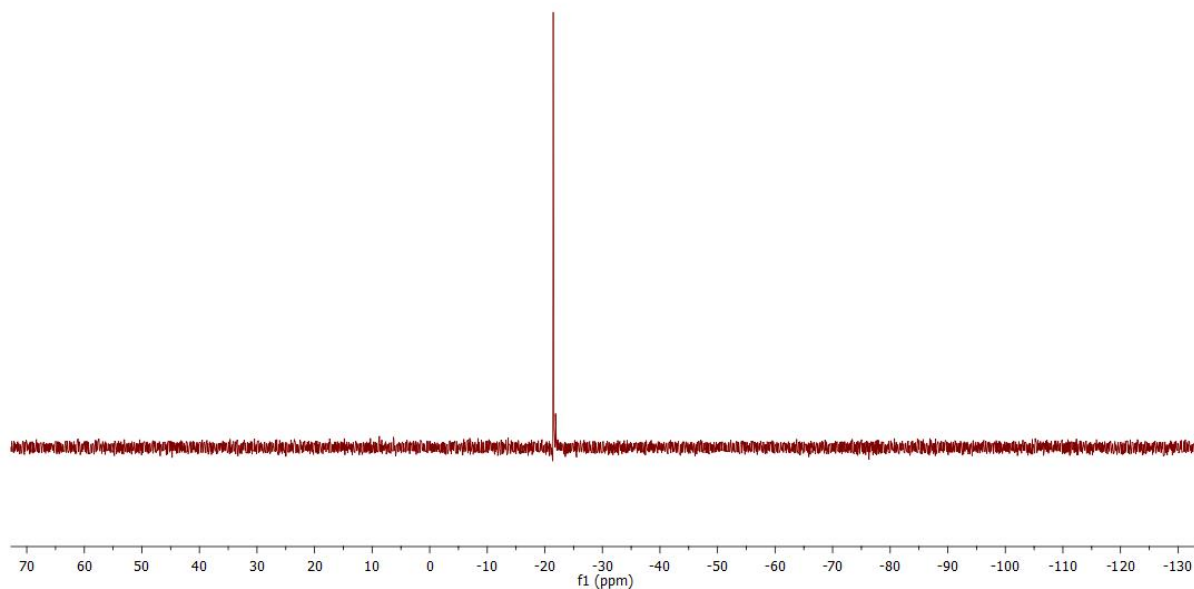

**Figure S39.**  $^{29}\text{Si}$  NMR (79 MHz,  $\text{CDCl}_3$ ) of product **15**

*Analytical data of product 15:*

Isolated yield: 89% (343.7 mg);  $^1\text{H}$  NMR ( $\text{CDCl}_3$ ,  $\delta$ , ppm): 5.41 (d, 1H,  $J_{\text{HH}} = 3.2$  Hz, SiH), 6.93 (dd, 1H,  $J_{\text{HH}} = 18.7, 3.2$  Hz, =CHSi), 7.45 – 7.50 (m, 6H, =CH and Ar), 7.58 – 7.72 (m, 5H, Ar), 7.74 – 7.76 (m, 4H, Ar), 7.89 – 7.94 (m, 2H, Ar), 7.98 – 8.0 (m, 1H, Ar), 8.10 – 8.14 (m, 1H, Ar);  $^{13}\text{C}$  NMR ( $\text{CDCl}_3$ ,  $\delta$ , ppm): 122.57, 123.14, 124.39, 125.10, 126.26, 126.56, 126.76, 126.85, 128.10, 128.22, 128.94, 129.93, 130.23, 130.38, 130.51, 131.69, 133.65, 134.79, 135.17, 135.22, 135.64, 147.25;  $^{29}\text{Si}$  NMR ( $\text{CDCl}_3$ ,  $\delta$ , ppm): -21.46; MS:  $m/z$  (rel. intensity): 105 (14), 179 (18), 184 (13), 202 (21), 203 (13), 307 (28), 308 (57), 309 (31), 310 (11), 386 (100,  $\text{M}^+$ ); anal. calcd. for  $\text{C}_{28}\text{H}_{22}\text{Si}$  (%): C: 87.00, H: 5.74; found: C: 87.12, H: 5.82.

**Product 16**

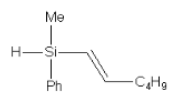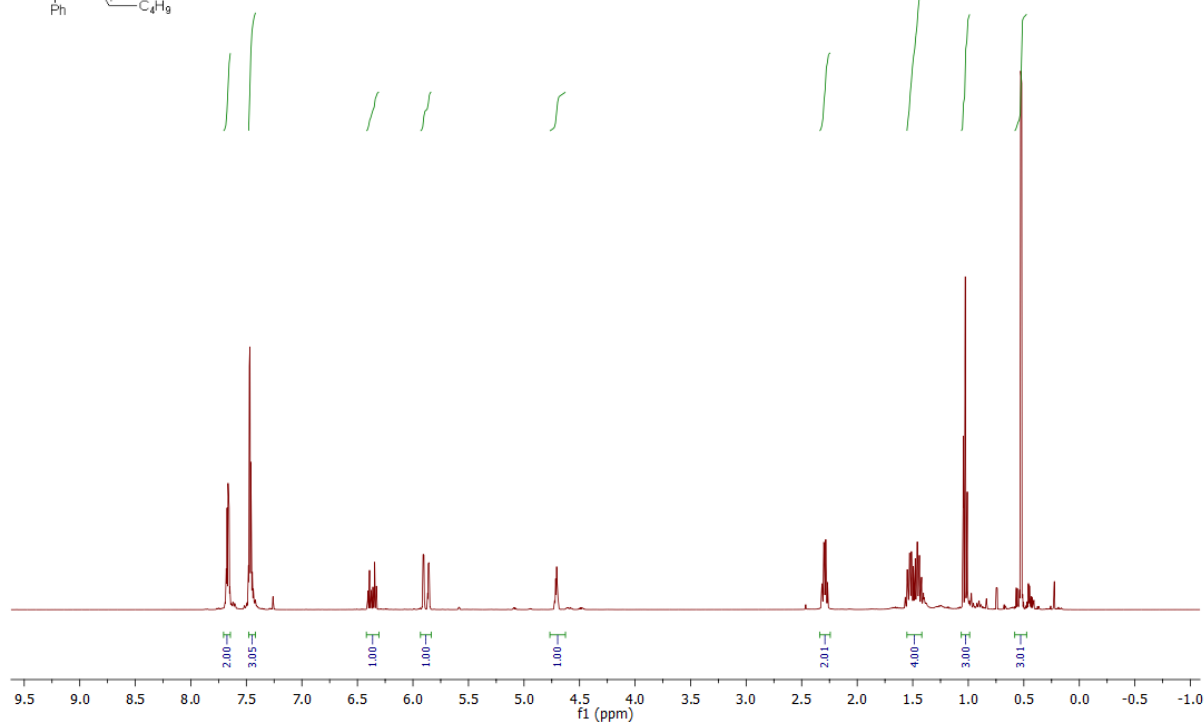

**Figure S40.** <sup>1</sup>H NMR (400 MHz, CDCl<sub>3</sub>) of product 16

**Product 16**

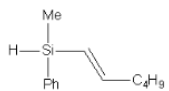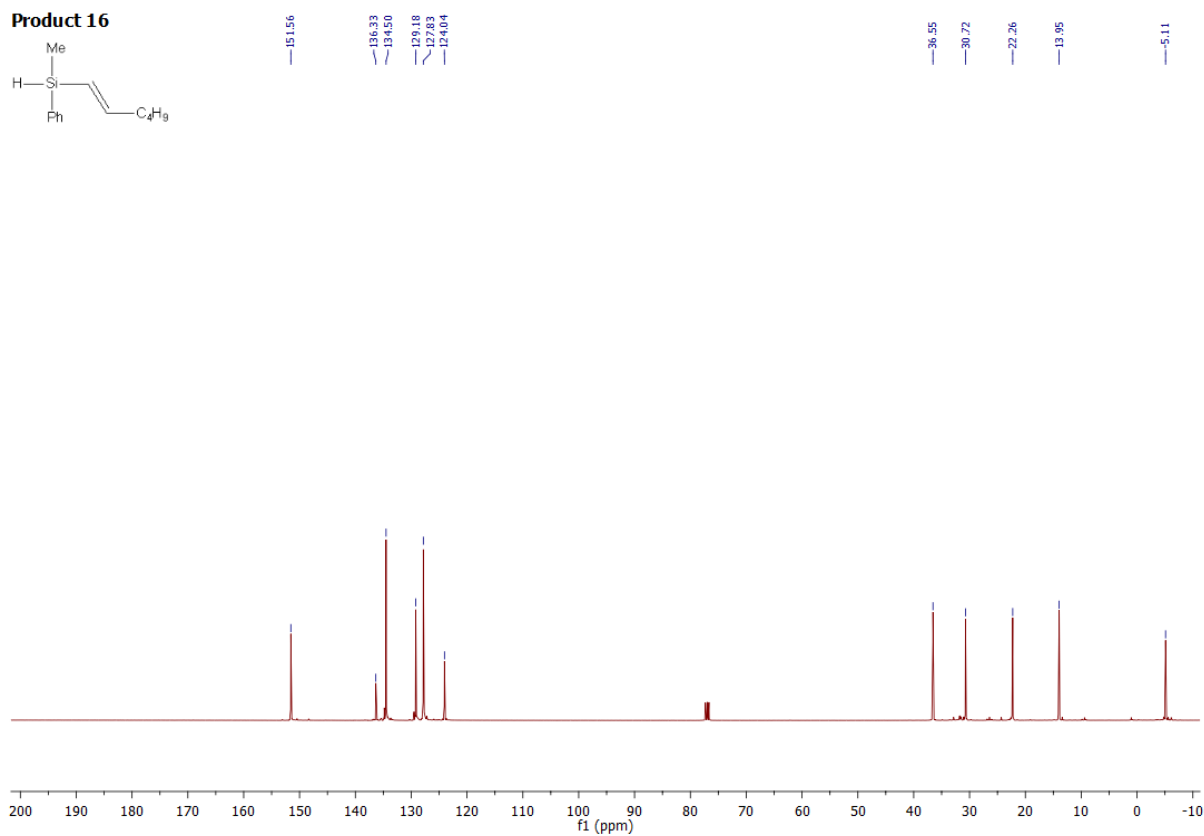

**Figure S41.** <sup>13</sup>C NMR (100 MHz, CDCl<sub>3</sub>) of product 16

**Product 16**

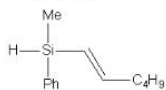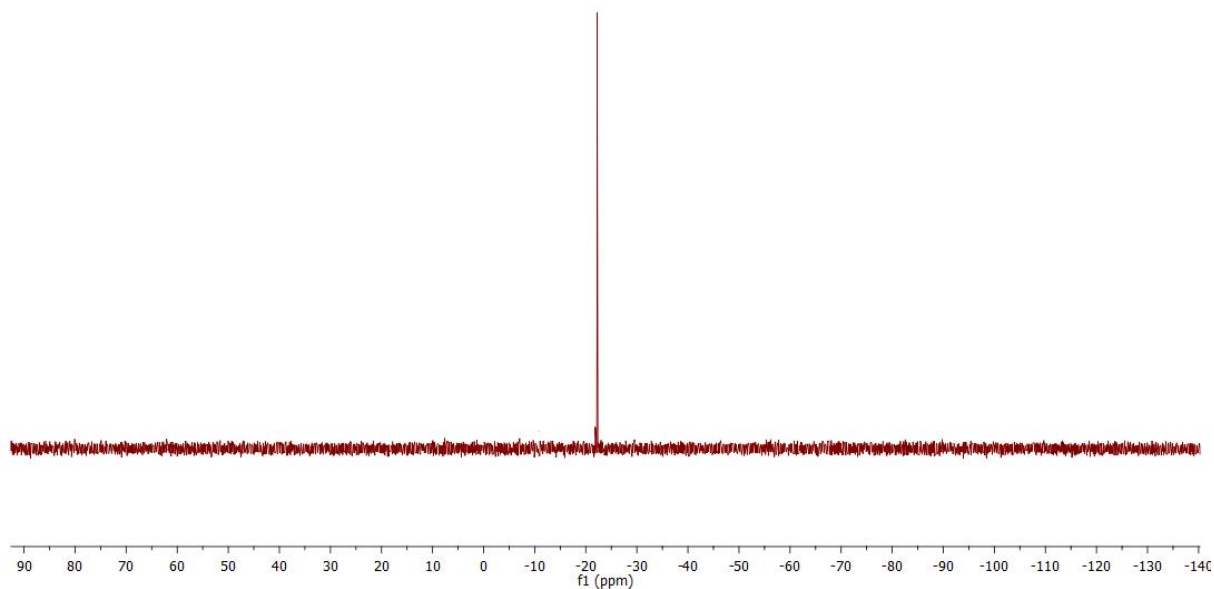

**Figure S42.**  $^{29}\text{Si}$  NMR (79 MHz,  $\text{CDCl}_3$ ) of product **16**

*Analytical data of product 16:*

Isolated yield: 94% (191.9 mg);  $^1\text{H}$  NMR ( $\text{CDCl}_3$ ,  $\delta$ , ppm): 0.52 (d, 3H,  $J_{\text{HH}} = 3.8$  Hz,  $\text{CH}_3$ ), 1.03 (d, 3H,  $J_{\text{HH}} = 7.2$  Hz,  $-(\text{CH}_2)_3\text{CH}_3$ ), 1.42 – 1.55 (m, 4H,  $-(\text{CH}_2)_2\text{CH}_3$ ), 2.24 – 2.34 (m, 2H,  $=\text{CHCH}_2$ ), 4.64 – 4.75 (m, 1H,  $\text{SiH}$ ), 5.84 – 5.93 (m, 1H,  $=\text{CHSi}$ ), 6.37 (dt, 1H,  $J_{\text{HH}} = 18.5, 6.3$  Hz,  $=\text{CHCH}_2$ ), 7.42 – 7.48 (m, 3H, Ph), 7.64 – 7.71 (m, 2H, Ph);  $^{13}\text{C}$  NMR ( $\text{CDCl}_3$ ,  $\delta$ , ppm): -5.11 ( $\text{CH}_3$ ), 13.95, 22.26, 30.72, 36.55, 124.04, 127.83, 129.18, 134.50, 136.33, 151.66;  $^{29}\text{Si}$  NMR ( $\text{CDCl}_3$ ,  $\delta$ , ppm): -22.21; MS:  $m/z$  (rel. intensity): 105 (17), 121 (30), 202 (10), 204 (100,  $\text{M}^+$ ); anal. calcd. for  $\text{C}_{13}\text{H}_{20}\text{Si}$  (%): C: 76.40, H: 9.86; found: C: 76.51, H: 9.90.

**Product 17**

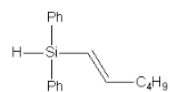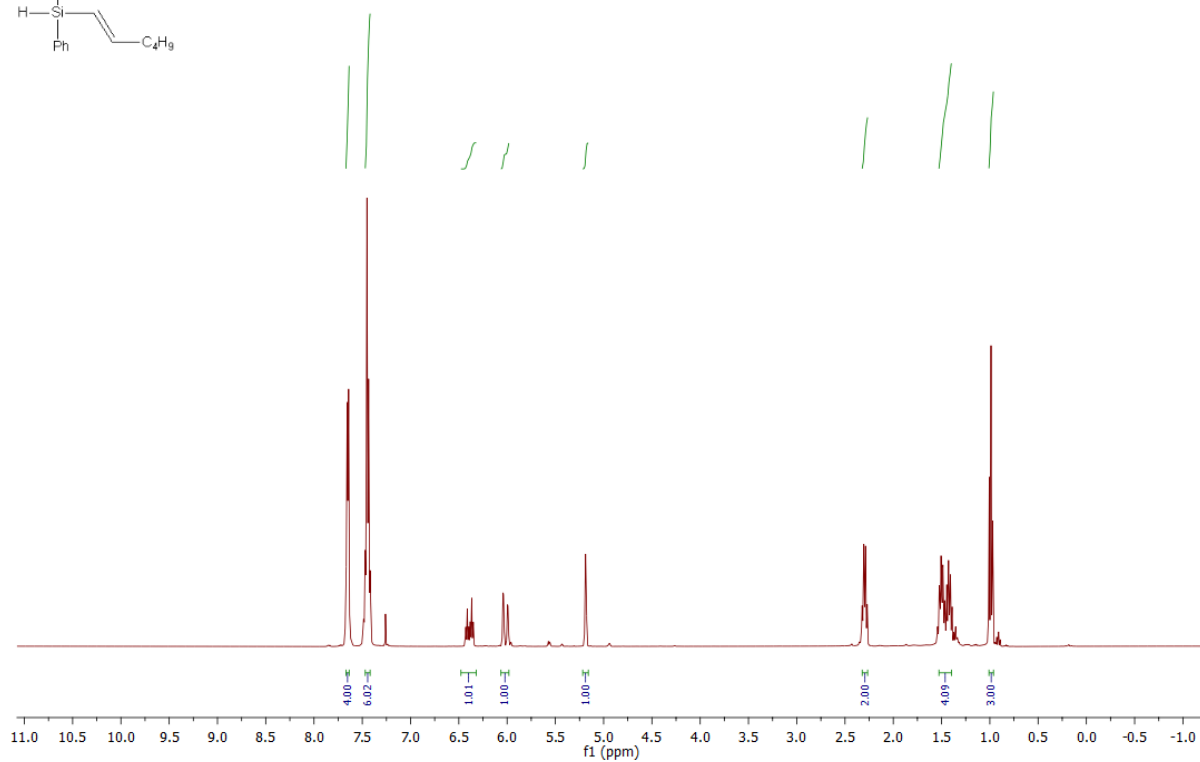

**Figure S43.** <sup>1</sup>H NMR (400 MHz, CDCl<sub>3</sub>) of product 17

**Product 17**

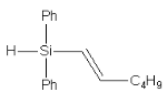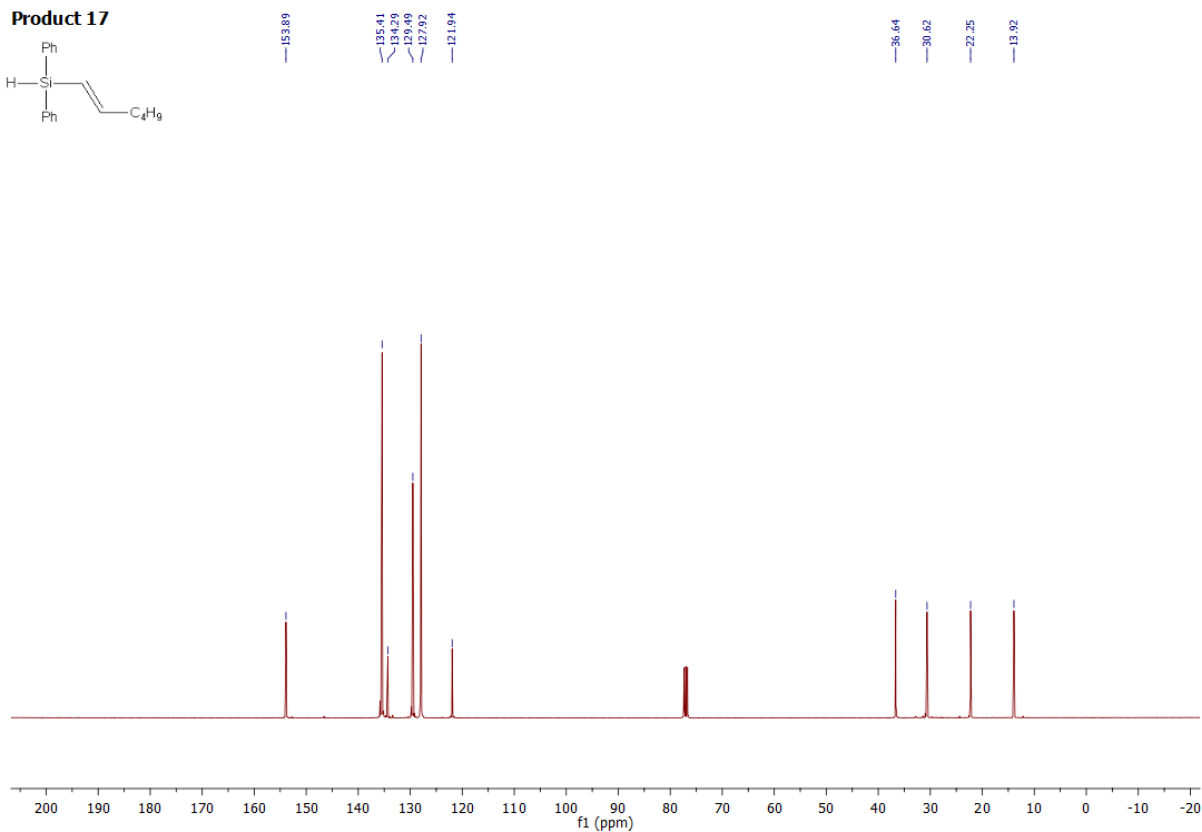

**Figure S44.** <sup>13</sup>C NMR (100 MHz, CDCl<sub>3</sub>) of product 17

**Product 17**

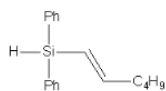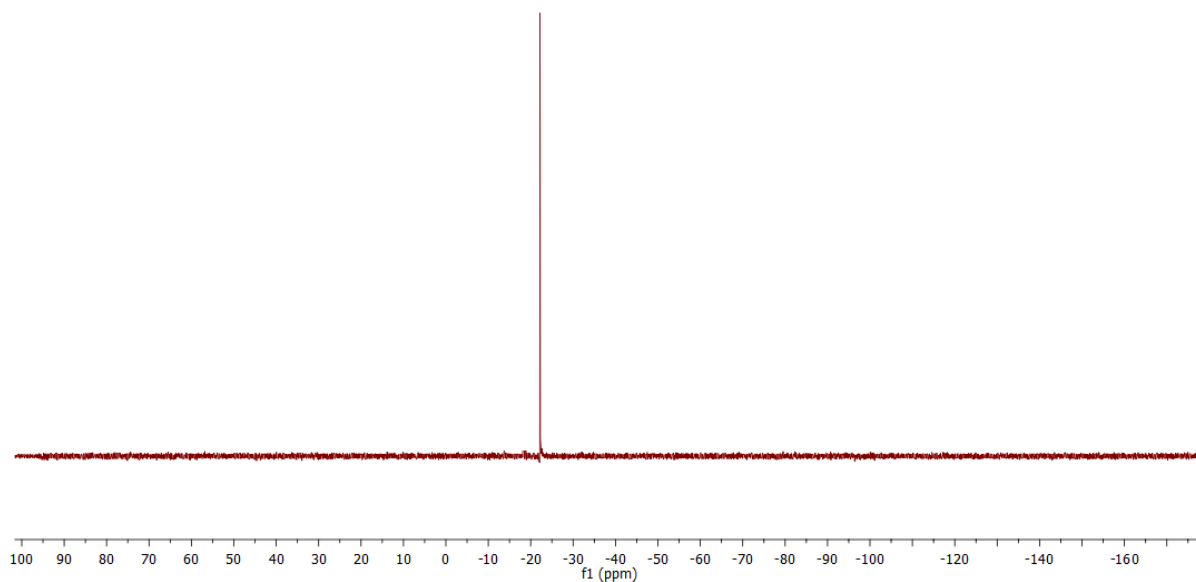

**Figure S45.**  $^{29}\text{Si}$  NMR (79 MHz,  $\text{CDCl}_3$ ) of product **17**

*Analytical data of product 17:*

Isolated yield: 92% (244.8 mg);  $^1\text{H}$  NMR ( $\text{CDCl}_3$ ,  $\delta$ , ppm): 0.99 (t, 3H,  $J_{\text{HH}} = 7.2$  Hz,  $-(\text{CH}_2)_3\text{CH}_3$ ), 1.40–1.53 (m, 4H,  $-(\text{CH}_2)_2\text{CH}_3$ ), 2.27–2.32 (m, 2H,  $=\text{CHCH}_2$ ), 5.18 (d, 1H,  $J_{\text{HH}} = 3.0$  Hz, SiH), 5.98–6.07 (m, 1H,  $=\text{CHSi}$ ), 6.39 (dt, 1H,  $J_{\text{HH}} = 18.5, 6.2$  Hz,  $=\text{CHCH}_2$ ), 7.42–7.47 (m, 6h, Ph), 7.64–7.70 (m, 4H, Ph);  $^{13}\text{C}$  NMR ( $\text{CDCl}_3$ ,  $\delta$ , ppm): 13.92, 22.25, 30.62, 36.64, 121.94, 127.92, 129.49, 134.29, 135.41, 153.89;  $^{29}\text{Si}$  NMR ( $\text{CDCl}_3$ ,  $\delta$ , ppm): -22.20; MS:  $m/z$  (rel. intensity): 53 (18), 105 (42), 106 (16), 145 (16), 146 (17), 181 (33), 183 (48), 184 (19), 188 (19), 189 (26), 259 (17), 265 (100), 266 (28,  $\text{M}^+$ ).

**Product 18**

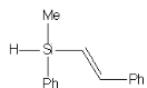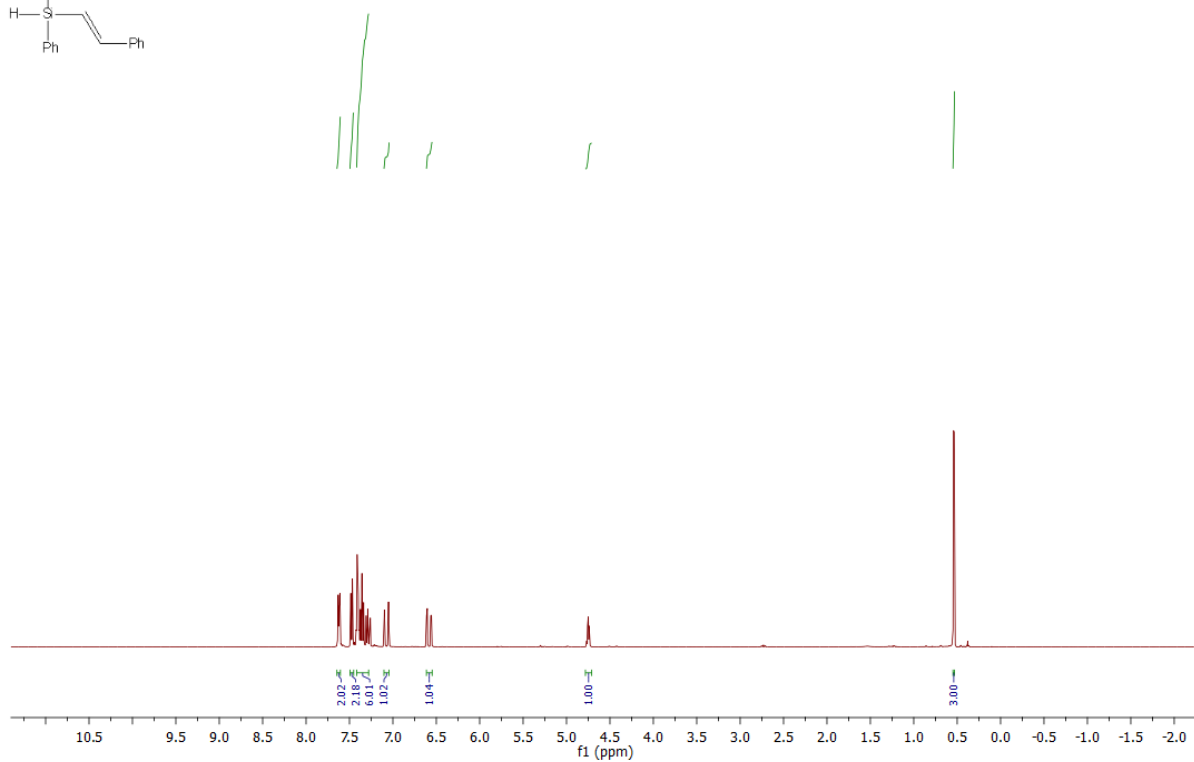

**Figure S46.** <sup>1</sup>H NMR (400 MHz, CDCl<sub>3</sub>) of product 18

**Product 18**

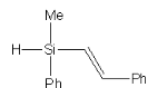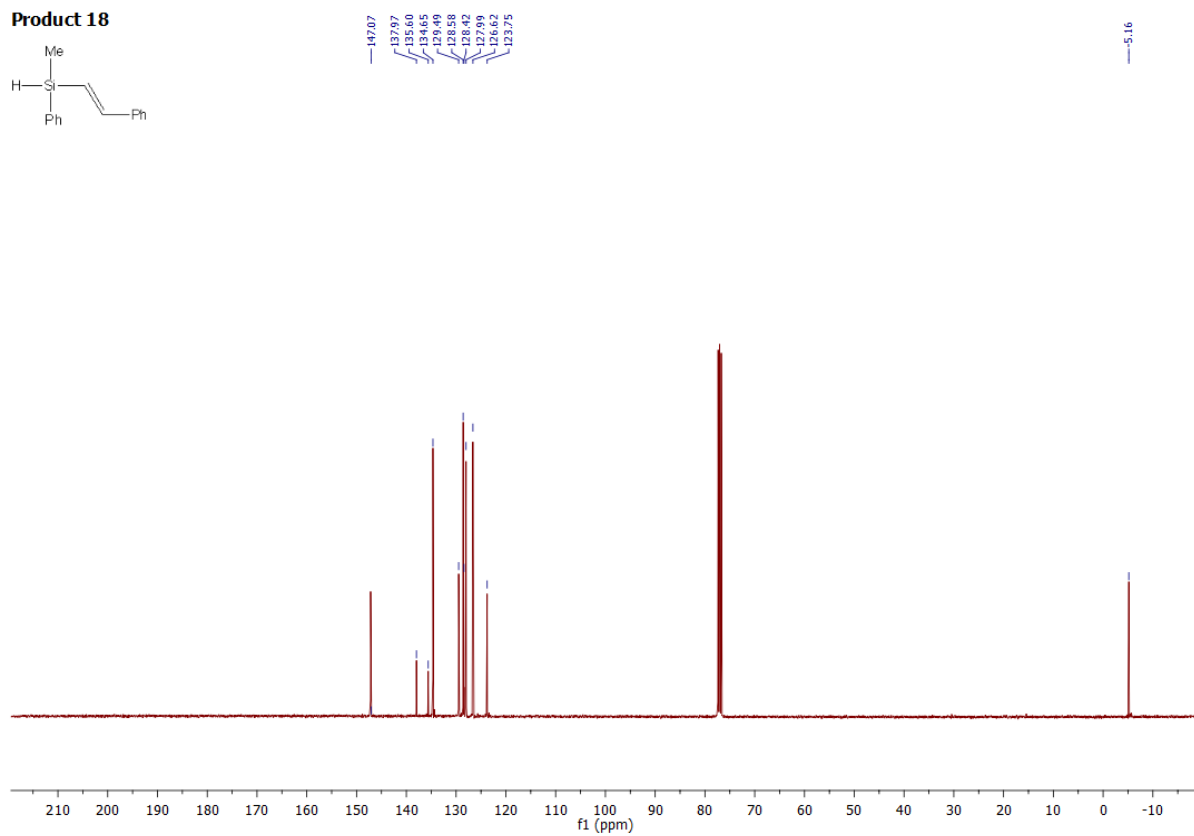

**Figure S47.** <sup>13</sup>C NMR (100 MHz, CDCl<sub>3</sub>) of product 18



**Product 18**

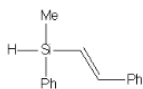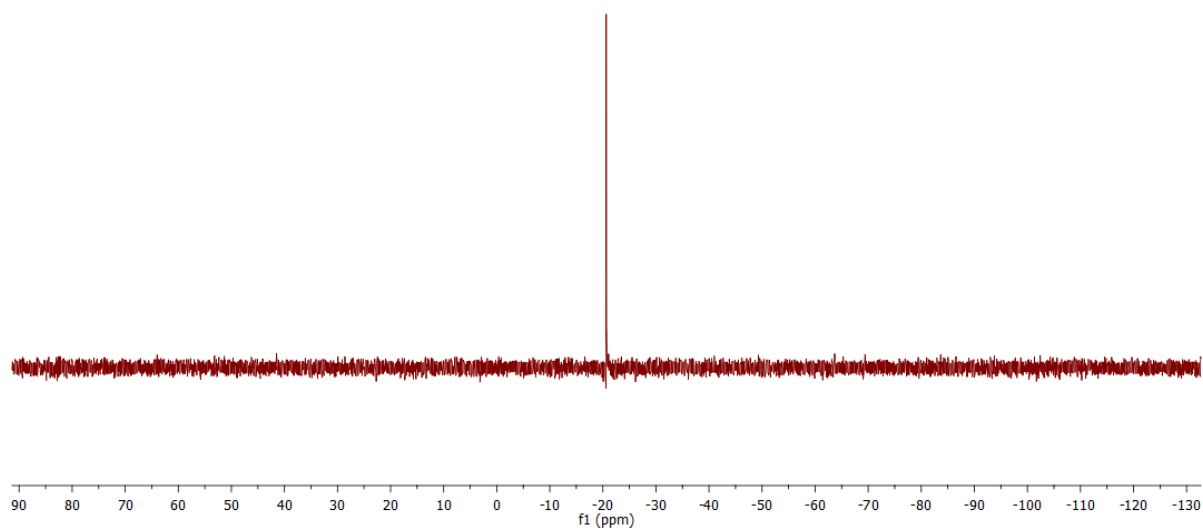

**Figure S48.**  $^{29}\text{Si}$  NMR (79 MHz,  $\text{CDCl}_3$ ) of product **18**

*Analytical data of product 18:*

Isolated yield: 91% (203.9 mg);  $^1\text{H}$  NMR ( $\text{CDCl}_3$ ,  $\delta$ , ppm): 0.54 (d, 3H,  $J_{\text{HH}} = 3.8$  Hz,  $\text{CH}_3$ ), 4.75 (d, 1H,  $J_{\text{HH}} = 3.6$  Hz,  $\text{SiH}$ ), 6.58 (dd, 1H,  $J_{\text{HH}} = 19.1, 3.0$  Hz,  $=\text{CHSi}$ ), 7.07 (d, 1H,  $J_{\text{HH}} = 19.1$  Hz,  $=\text{CH}$ ), 7.28 – 7.42 (m, 6H, Ph), 7.45 – 7.50 (m, 2H, Ph), 7.60 – 7.64 (m, 2H, Ph);  $^{13}\text{C}$  NMR ( $\text{CDCl}_3$ ,  $\delta$ , ppm): -5.16 ( $\text{CH}_3$ ), 123.75, 126.62, 127.99, 128.42, 128.58, 129.49, 134.65, 135.60, 137.97, 147.07;  $^{29}\text{Si}$  NMR ( $\text{CDCl}_3$ ,  $\delta$ , ppm): -20.64; MS:  $m/z$  (rel. intensity): 105 (55), 106 (16), 120 (30), 121 (14), 131 (25), 145 (33), 146 (63), 147 (19), 209 (68), 210 (17), 223 (100), 224 (75,  $\text{M}^+$ ); anal. calcd. for  $\text{C}_{15}\text{H}_{16}\text{Si}$  (%): C: 80.30, H: 7.19; found: C: 80.45, H: 7.31.

**Product 19**

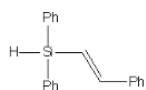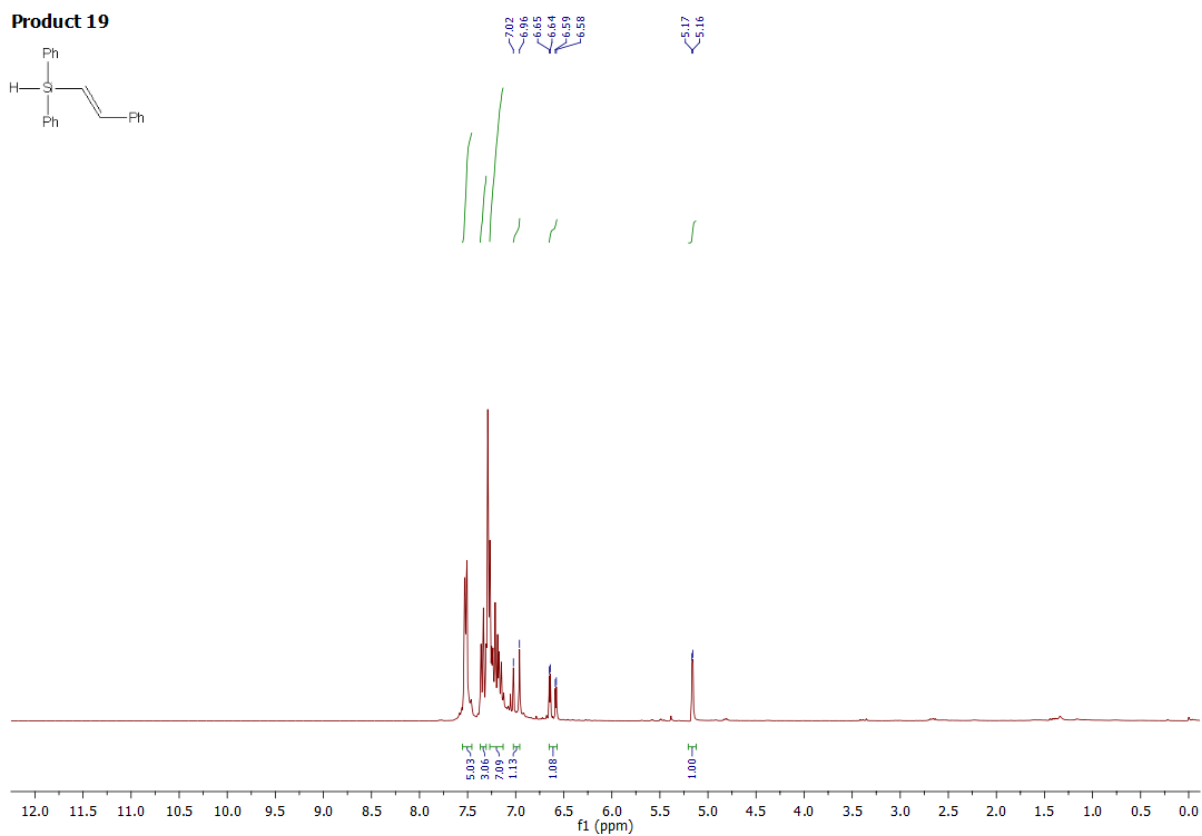

**Figure S49.** <sup>1</sup>H NMR (300 MHz, CDCl<sub>3</sub>) of product **19**

**Product 19**

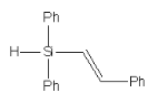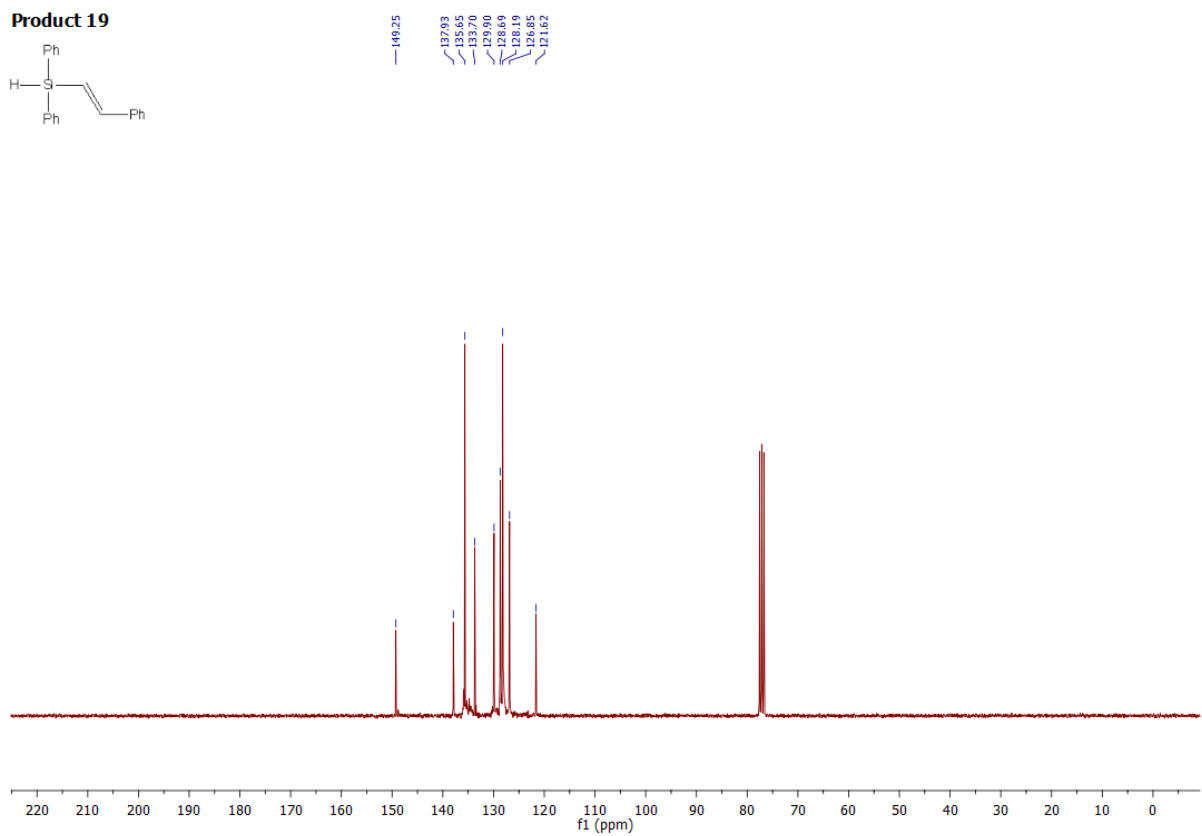

**Figure S50.** <sup>13</sup>C NMR (75 MHz, CDCl<sub>3</sub>) of product **19**

**Product 19**

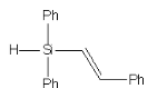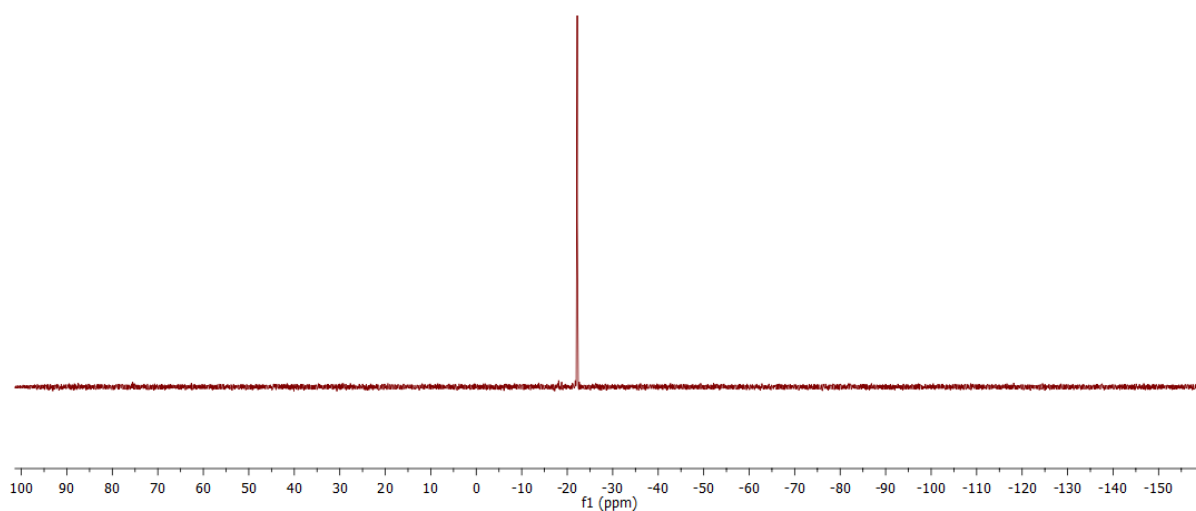

**Figure S51.**  $^{29}\text{Si}$  NMR (79 MHz,  $\text{CDCl}_3$ ) of product **19**

*Analytical data of product 19:*

Isolated yield: 90% (257.5 mg);  $^1\text{H}$  NMR ( $\text{CDCl}_3$ ,  $\delta$ , ppm): 5.16 (d, 1H,  $J_{\text{HH}} = 3.1$  Hz, SiH), 6.61 (dd, 1H,  $J_{\text{HH}} = 19.0, 3.2$  Hz, =CHSi), 6.99 (d, 1H,  $J_{\text{HH}} = 19.0$  Hz, =CH), 7.12 – 7.27 (m, 7H, Ph), 7.31 – 7.37 (m, 3H, Ph), 7.45 – 7.55 (m, 5H, Ph);  $^{13}\text{C}$  NMR ( $\text{CDCl}_3$ ,  $\delta$ , ppm): 121.62, 126.85, 128.19, 128.69, 129.90, 133.70, 135.65, 137.93, 149.25;  $^{29}\text{Si}$  NMR( $\text{CDCl}_3$ ,  $\delta$ , ppm): -22.10; MS:  $m/z$  (rel. intensity): 53 (10), 105 (27), 106 (12), 130 (19), 131 (19), 132 (12), 181 (14), 205 (12), 207 (19), 208 (29), 209 (32), 210 (34), 285 (78), 286 (100,  $\text{M}^+$ ).

**Product 20**

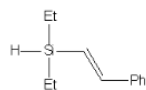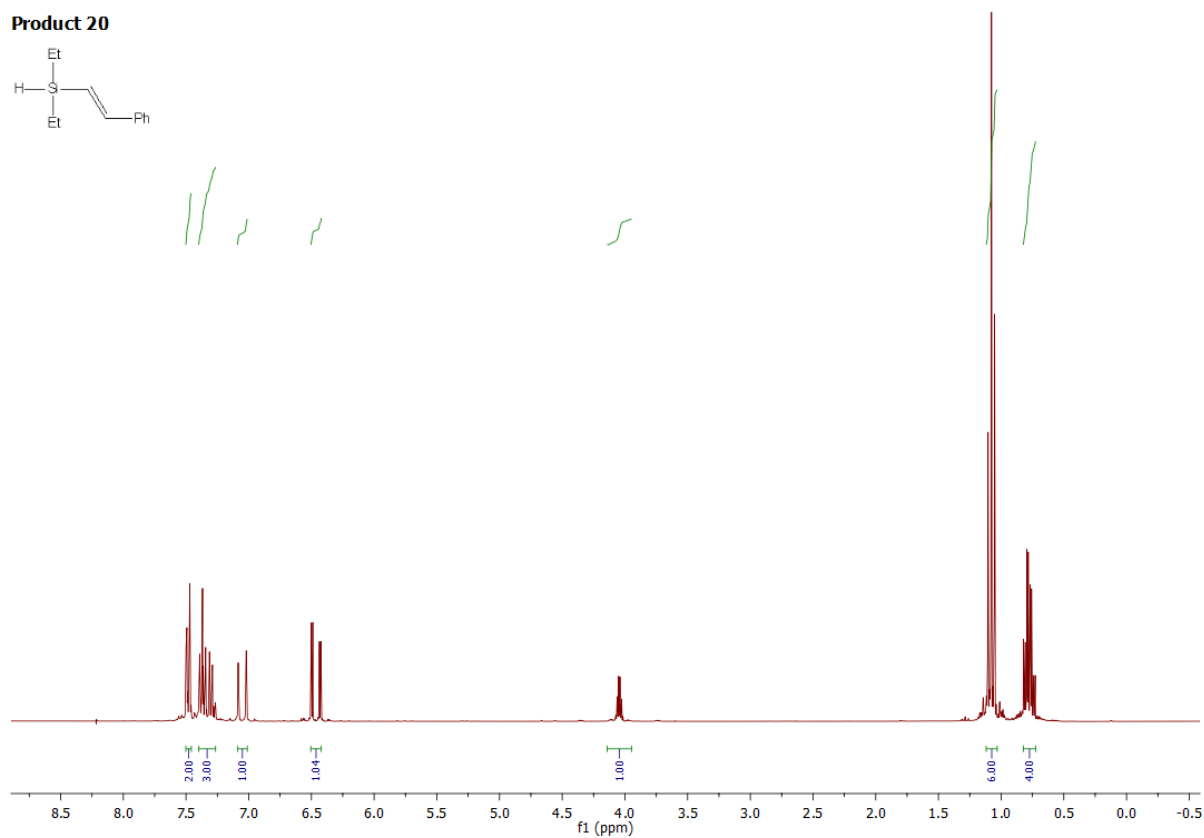

**Figure S52.** <sup>1</sup>H NMR (300 MHz, CDCl<sub>3</sub>) of product **20**

**Product 20**

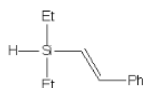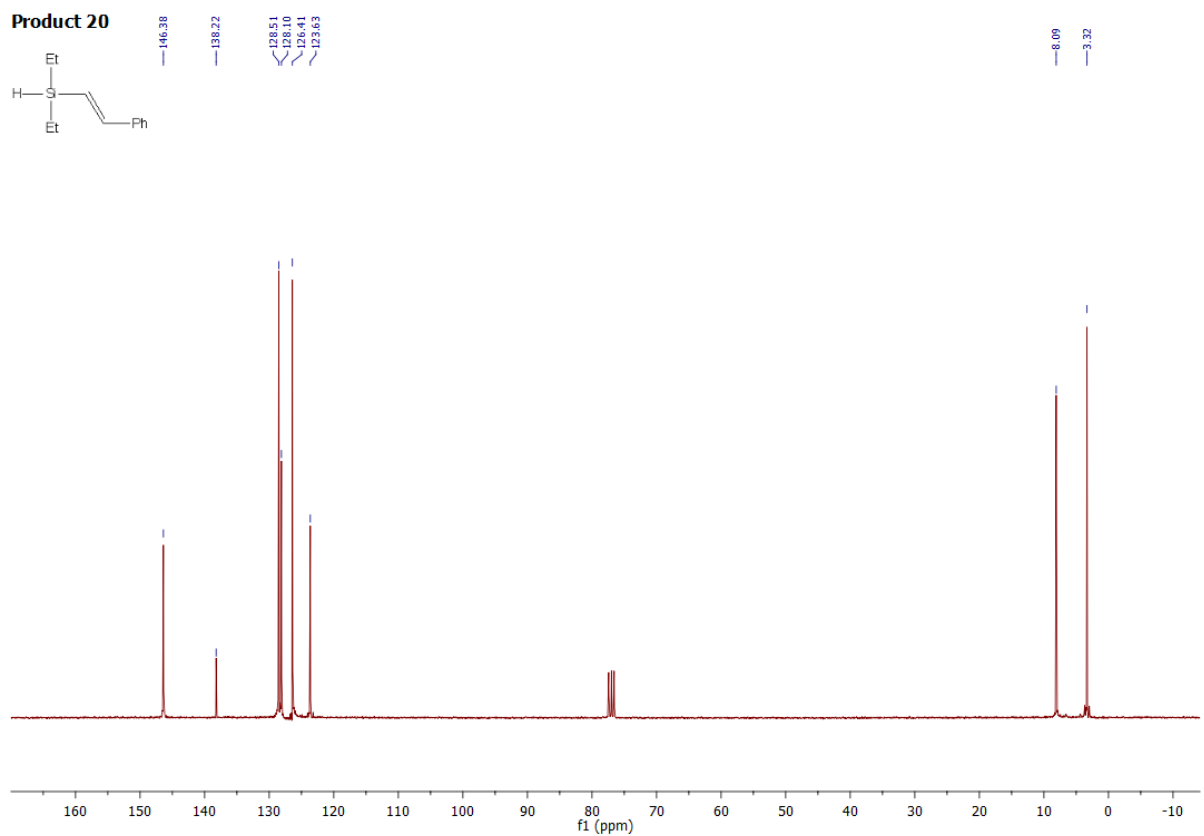

**Figure S53.** <sup>13</sup>C NMR (75 MHz, CDCl<sub>3</sub>) of product **20**

**Product 20**

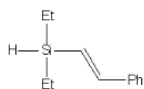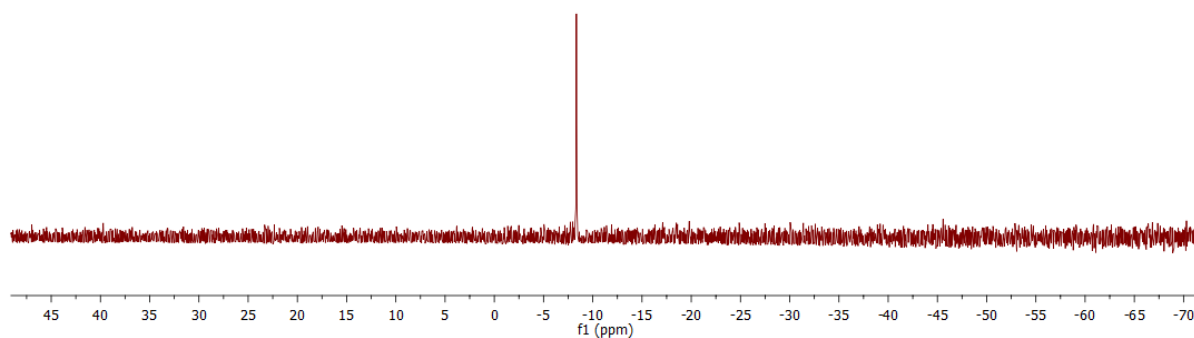

**Figure S54.**  $^{29}\text{Si}$  NMR (79 MHz,  $\text{CDCl}_3$ ) of product **20**

*Analytical data of product 20:*

Isolated yield: 90% (171.1 mg);  $^1\text{H}$  NMR ( $\text{CDCl}_3$ ,  $\delta$ , ppm): 0.71-0.83 (m, 4H,  $\text{CH}_3\text{CH}_2$ -), 1.03-1.12 (m, 6H,  $\text{CH}_3\text{CH}_2$ -), 4.01 – 4.07 (m, 1H, SiH), 6.46 (dd, 1H,  $J_{\text{HH}} = 19.3, 3.4$  Hz, =CHSi), 7.05 (d, 1H,  $J_{\text{HH}} = 19.2$  Hz, =CH), 7.26 – 7.40 (m, 3H, Ph), 7.46 – 7.50 (m, 2H, Ph);  $^{13}\text{C}$  NMR ( $\text{CDCl}_3$ ,  $\delta$ , ppm): 3.32 ( $\text{CH}_3$ ), 8.09 ( $\text{CH}_2$ ), 123.63, 126.41, 128.51, 138.22, 146.38;  $^{29}\text{Si}$  NMR ( $\text{CDCl}_3$ ,  $\delta$ , ppm): -8.34; MS:  $m/z$  (rel. intensity): 58 (11), 105 (23), 131 (81), 132 (14), 133 (76), 134 (11), 149 (11), 159 (34), 161 (100), 162 (19), 190 (27,  $\text{M}^+$ ); anal. calcd. for  $\text{C}_{12}\text{H}_{18}\text{Si}$  (%): C: 75.71, H: 9.53; found: C: 75.80, H: 9.55.

## 1.2. NMR spectra and analytical data of symmetrical *E,E*-divinylsilanes

Product 21

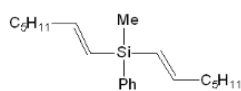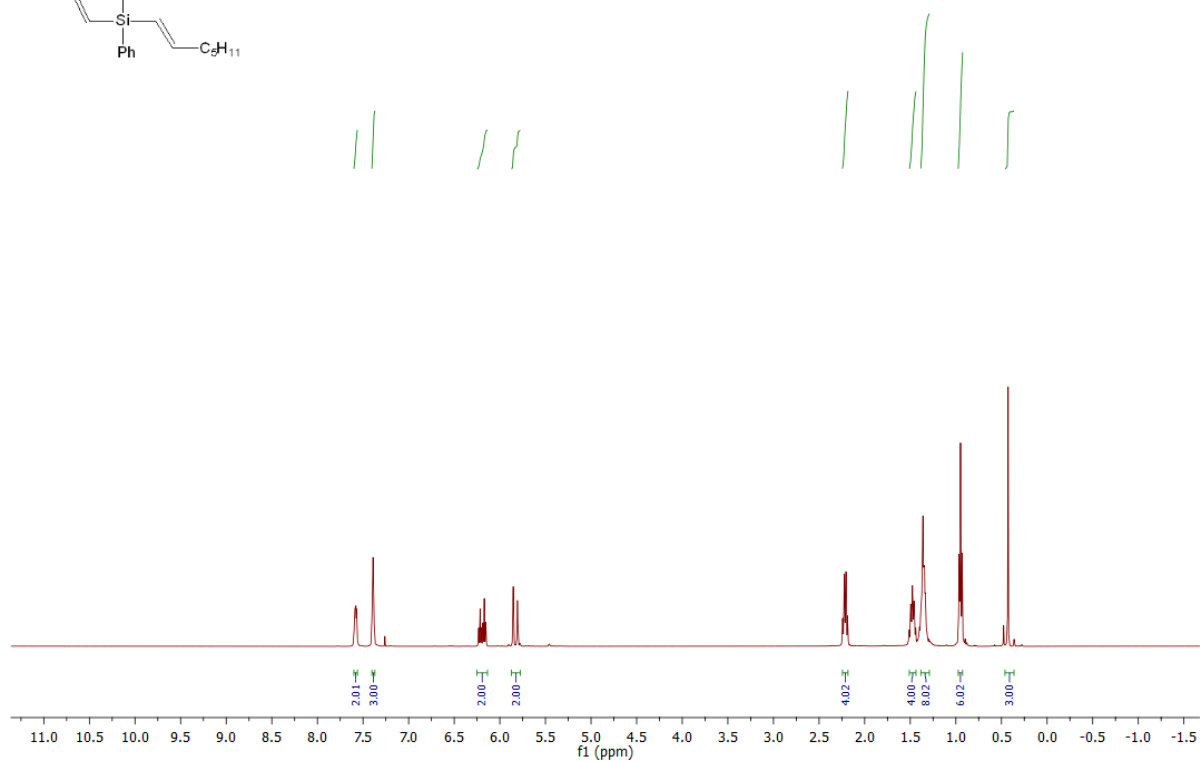

Figure S55. <sup>1</sup>H NMR (400 MHz, CDCl<sub>3</sub>) of product 21

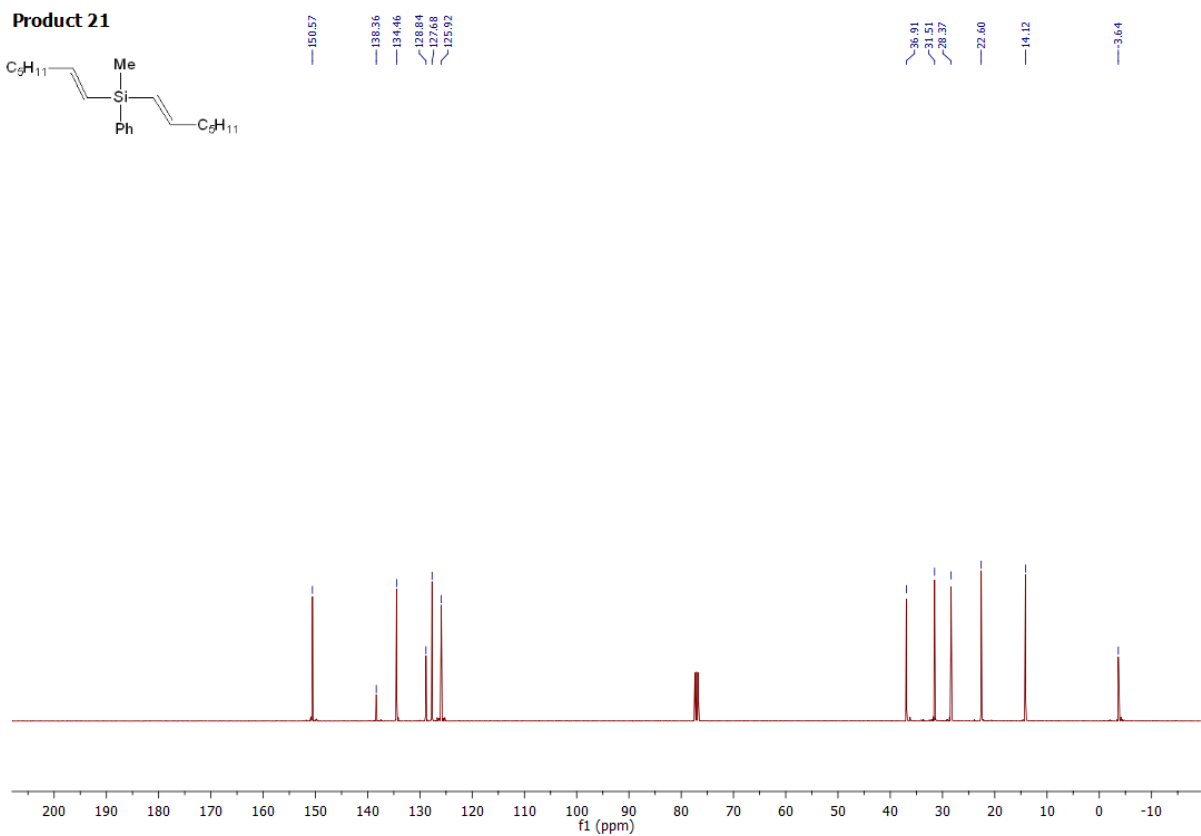

Figure S56. <sup>13</sup>C NMR (100 MHz, CDCl<sub>3</sub>) of product 21

**Product 21**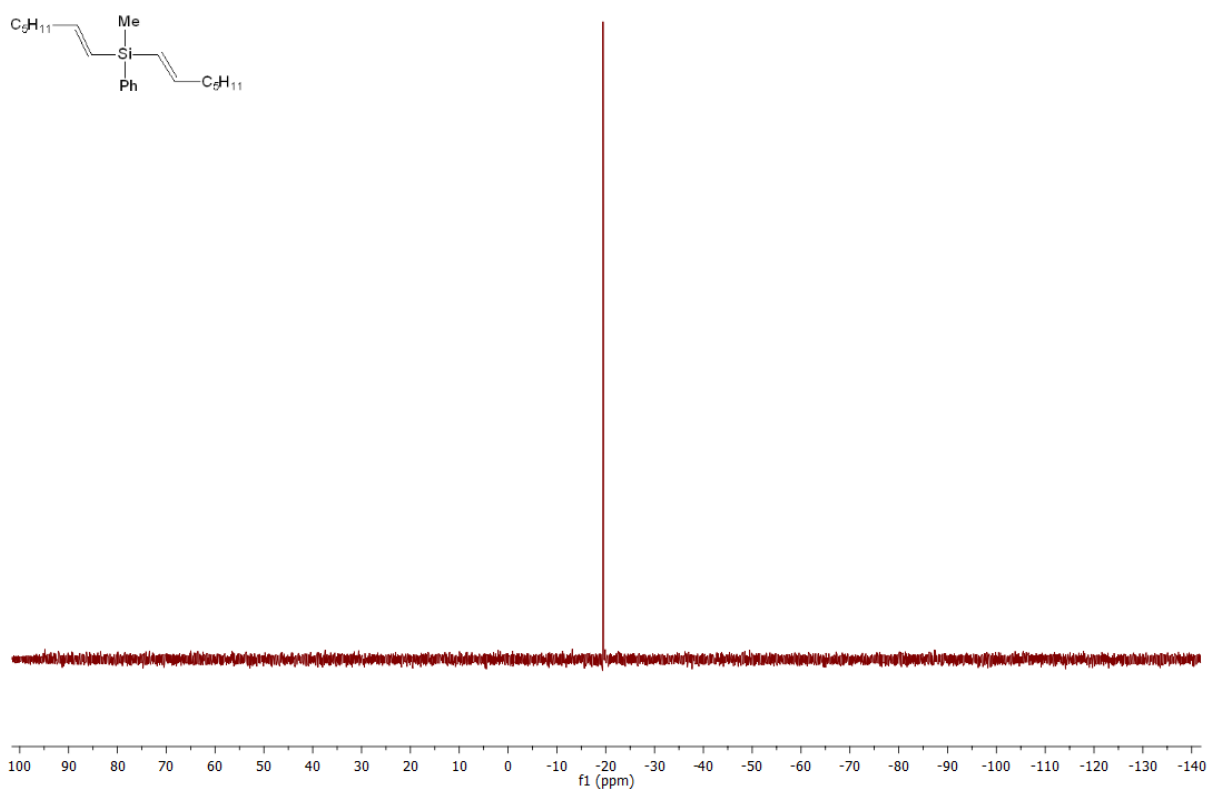**Figure S57.** <sup>29</sup>Si NMR (79 MHz, CDCl<sub>3</sub>) of product **21***Analytical data of product 21:*

Isolated yield: 92% (318 mg): <sup>1</sup>H NMR (CDCl<sub>3</sub>, δ, ppm): 0.43 (s, 3H, CH<sub>3</sub>), 0.95 (t, 6H, *J*<sub>HH</sub> = 6.8 Hz, -(CH<sub>2</sub>)<sub>4</sub>CH<sub>3</sub>), 1.29 – 1.38 (m, 8H, -(CH<sub>2</sub>)<sub>4</sub>CH<sub>3</sub>), 1.44 – 1.51 (m, 4H, -(CH<sub>2</sub>)<sub>4</sub>CH<sub>3</sub>), 2.18 – 2.24 (m, 4H, =CHCH<sub>2</sub>), 5.83 (d, 2H, *J*<sub>HH</sub> = 18.5 Hz, =CHSi), 6.19 (dt, 2H, *J*<sub>HH</sub> = 18.5, 6.2 Hz, =CHCH<sub>2</sub>), 7.37– 7.40 (m, 3H, Ph), 7.55 – 7.60 (m, 2H, Ph); <sup>13</sup>C NMR (CDCl<sub>3</sub>, δ, ppm): -3.64 (CH<sub>3</sub>), 14.12, 22.60, 28.37, 31.51, 36.91, 125.92, 127.68, 128.84, 134.46, 138.36, 150.57; <sup>29</sup>Si NMR (CDCl<sub>3</sub>, δ, ppm): -19.46; MS: *m/z* (rel. intensity): 95 (20), 105 (21), 107 (15), 121 (66), 122 (19), 145 (43), 146 (20), 174 (17), 159 (25), 160 (17), 173 (27), 174 (22), 216 (19), 217 (42), 218 (15), 237 (99), 238 (27), 243 (82), 245 (31), 299 (100), 300 (25), 314 (2, M<sup>+</sup>); anal. calcd. for C<sub>21</sub>H<sub>34</sub>Si (%): C: 80.18, H: 10.89; found: C: 80.32, H: 10.99.

**Product 22**

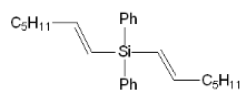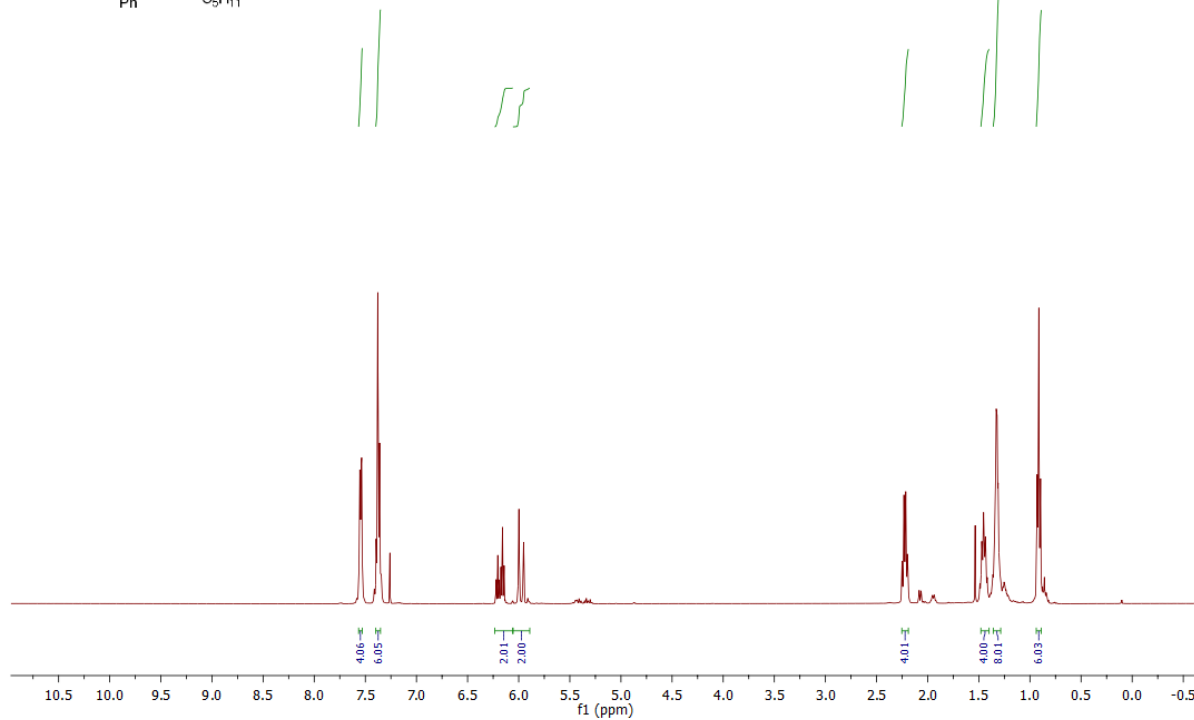

**Figure S58.** <sup>1</sup>H NMR (400 MHz, CDCl<sub>3</sub>) of product 22

**Product 22**

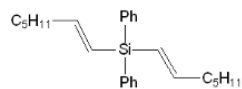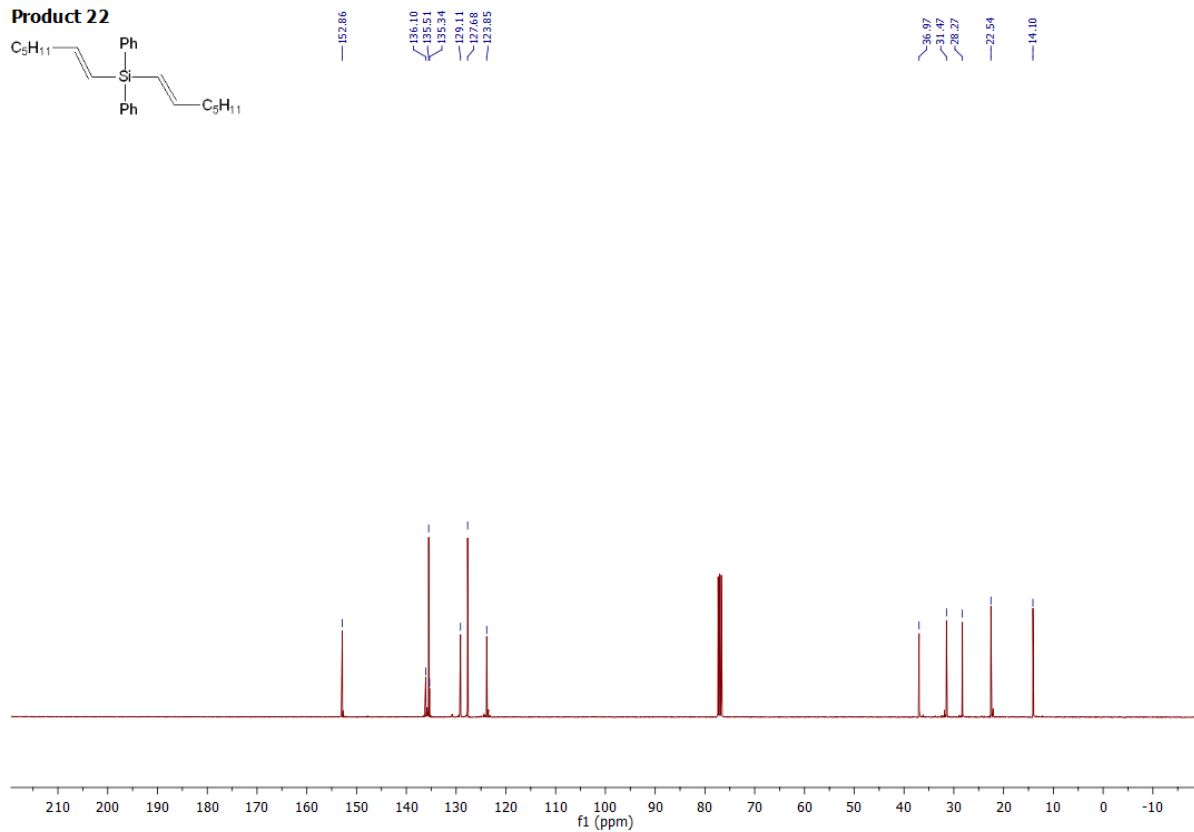

**Figure S59.** <sup>13</sup>C NMR (100 MHz, CDCl<sub>3</sub>) of product 22



**Product 22**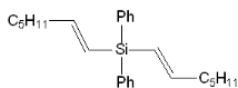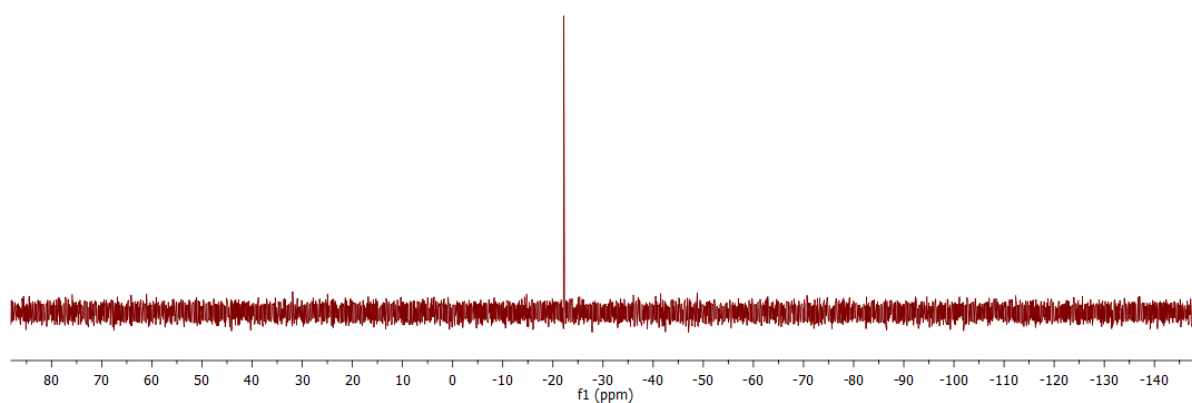**Figure S60.**  $^{29}\text{Si}$  NMR (79 MHz,  $\text{CDCl}_3$ ) of product **22***Analytical data of product 22:*

Isolated yield: 90% (372.5 mg);  $^1\text{H}$  NMR ( $\text{CDCl}_3$ ,  $\delta$ , ppm): 0.91 (t, 6H,  $J_{\text{HH}} = 6.8$  Hz,  $-(\text{CH}_2)_4\text{CH}_3$ ), 1.29 – 1.36 (m, 8H,  $-(\text{CH}_2)_4\text{CH}_3$ ), 1.40 – 1.48 (m, 4H,  $-(\text{CH}_2)_4\text{CH}_3$ ), 2.19 – 2.25 (m, 4H,  $=\text{CHCH}_2$ ), 5.98 (d, 2H,  $J_{\text{HH}} = 19.3$  Hz,  $=\text{CHSi}$ ), 6.18 (dt, 2H,  $J_{\text{HH}} = 18.5, 6.2$  Hz,  $=\text{CHCH}_2$ ), 7.35 – 7.40 (m, 6H, Ph), 7.53 – 7.57 (m, 4H, Ph);  $^{13}\text{C}$  NMR ( $\text{CDCl}_3$ ,  $\delta$ , ppm): 14.10, 22.54, 28.27, 31.47, 36.97, 123.85, 127.68, 129.11, 135.34, 135.51, 136.10, 152.68;  $^{29}\text{Si}$  NMR ( $\text{CDCl}_3$ ,  $\delta$ , ppm): -22.19; MS:  $m/z$  (rel. intensity): 105 (11), 183 (17), 279 (17), 280 (100), 281 (34), 299 (65), 300 (19), 305 (63), 306 (22), 376 (2,  $\text{M}^+$ ); anal. calcd. for  $\text{C}_{26}\text{H}_{36}\text{Si}$  (%): C: 82.91, H: 9.63; found: C: 82.80, H: 9.55.

**Product 23**

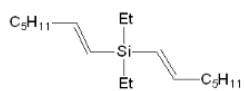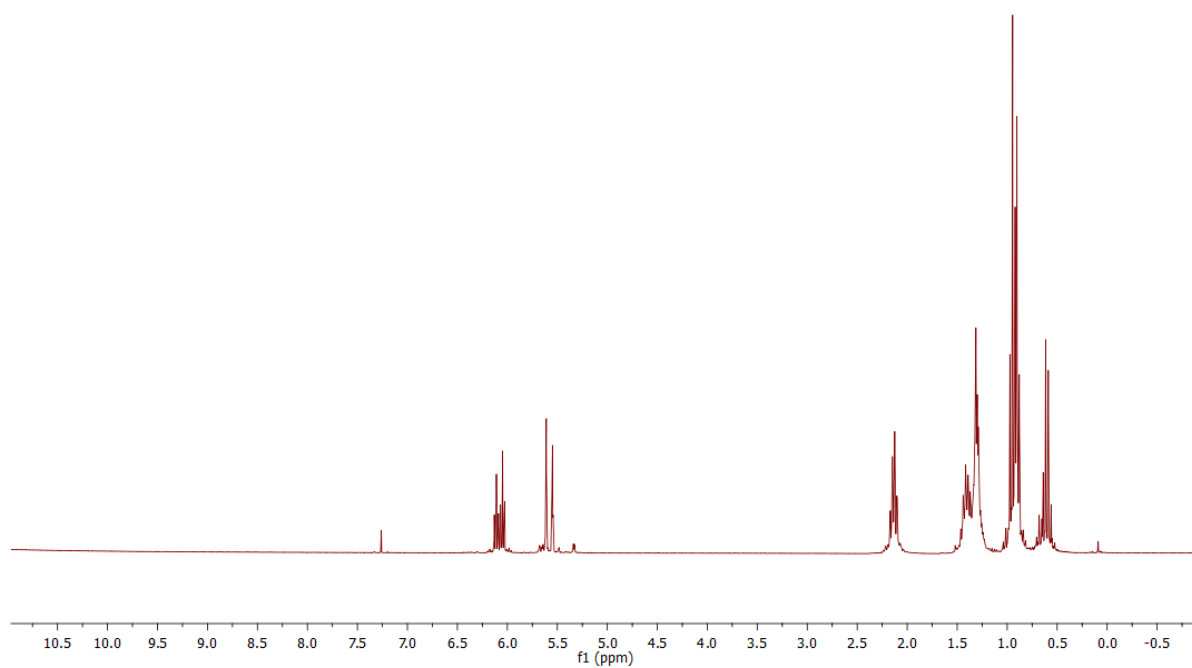

**Figure S61.** <sup>1</sup>H NMR (400 MHz, CDCl<sub>3</sub>) of product 23

**Product 23**

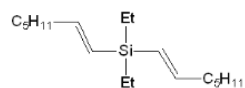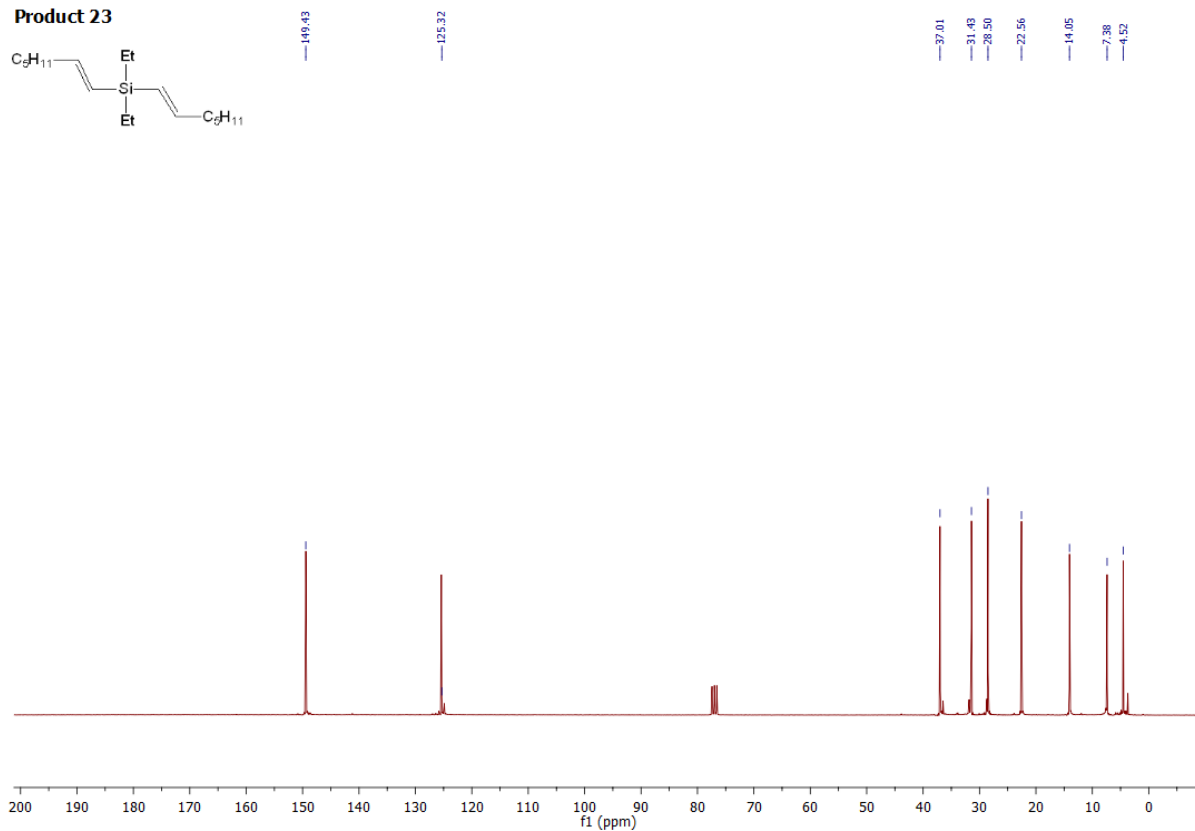

**Figure S62.** <sup>13</sup>C NMR (100 MHz, CDCl<sub>3</sub>) of product 23

**Product 23**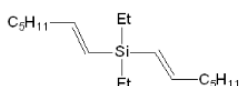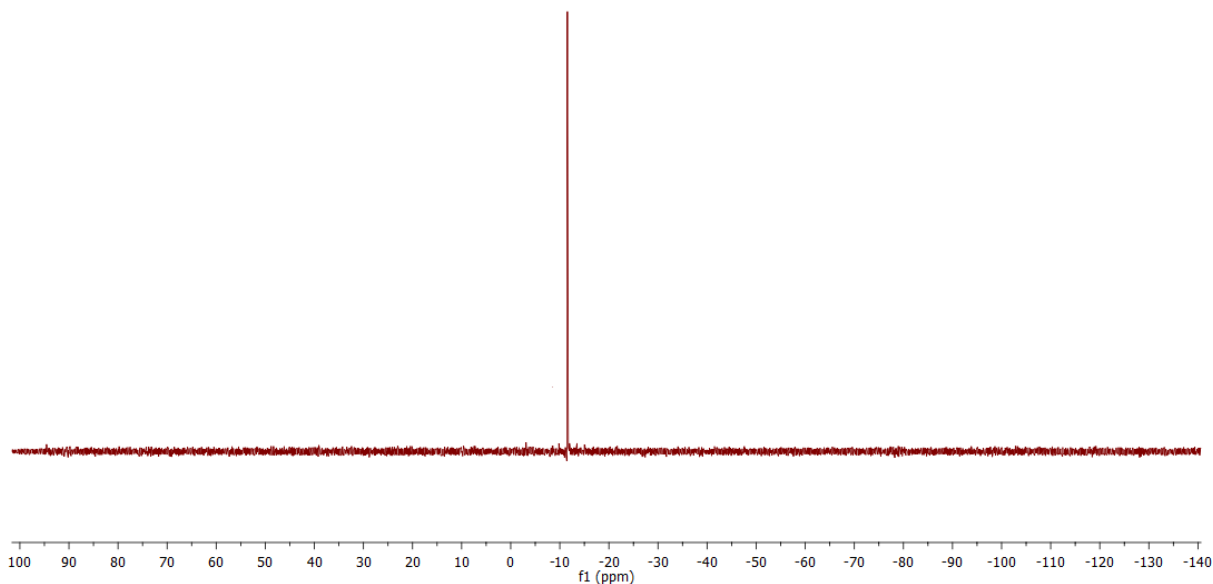

**Figure S63.**  $^{29}\text{Si}$  NMR (79 MHz,  $\text{CDCl}_3$ ) of product **23**

*Analytical data of product 23:*

Isolated yield: 92% (283.6 mg);  $^1\text{H}$  NMR ( $\text{CDCl}_3$ ,  $\delta$ , ppm): 0.53 – 0.68 (m, 4H,  $\text{CH}_3\text{CH}_2$ -), 0.86 – 1.00 (m, 12H,  $-(\text{CH}_2)_4\text{CH}_3$ ), 1.25 – 1.45 (m, 12H,  $-(\text{CH}_2)_4\text{CH}_3$ ), 2.07 – 2.20 (m, 4H,  $=\text{CHCH}_2$ ), 5.58 (d, 2H,  $J_{\text{HH}} = 18.6$  Hz,  $=\text{CHSi}$ ), 6.08 (dt, 2H,  $J_{\text{HH}} = 18.6$ , 6.3 Hz,  $=\text{CHCH}_2$ );  $^{13}\text{C}$  NMR ( $\text{CDCl}_3$ ,  $\delta$ , ppm): 4.52 ( $\text{CH}_3$ ), 7.38 ( $\text{CH}_2$ ), 14.05, 22.56, 28.50, 31.43, 37.01, 125.32, 149.43;  $^{29}\text{Si}$  NMR ( $\text{CDCl}_3$ ,  $\delta$ , ppm): -11.55; MS:  $m/z$  (rel. intensity): 59 (28), 83 (915), 85 (18), 87 (18), 95 (27), 97 (36), 99 (32), 111 (30), 113 (25), 125 (38), 127 (17), 153 (25), 183 (17), 223 (40), 251 (100), 252 (21), 280 (2,  $\text{M}^+$ ); anal. calcd. for  $\text{C}_{18}\text{H}_{36}\text{Si}$  (%): C: 77.06, H: 12.96; found: C: 77.12, H: 12.99.

**Product 24**

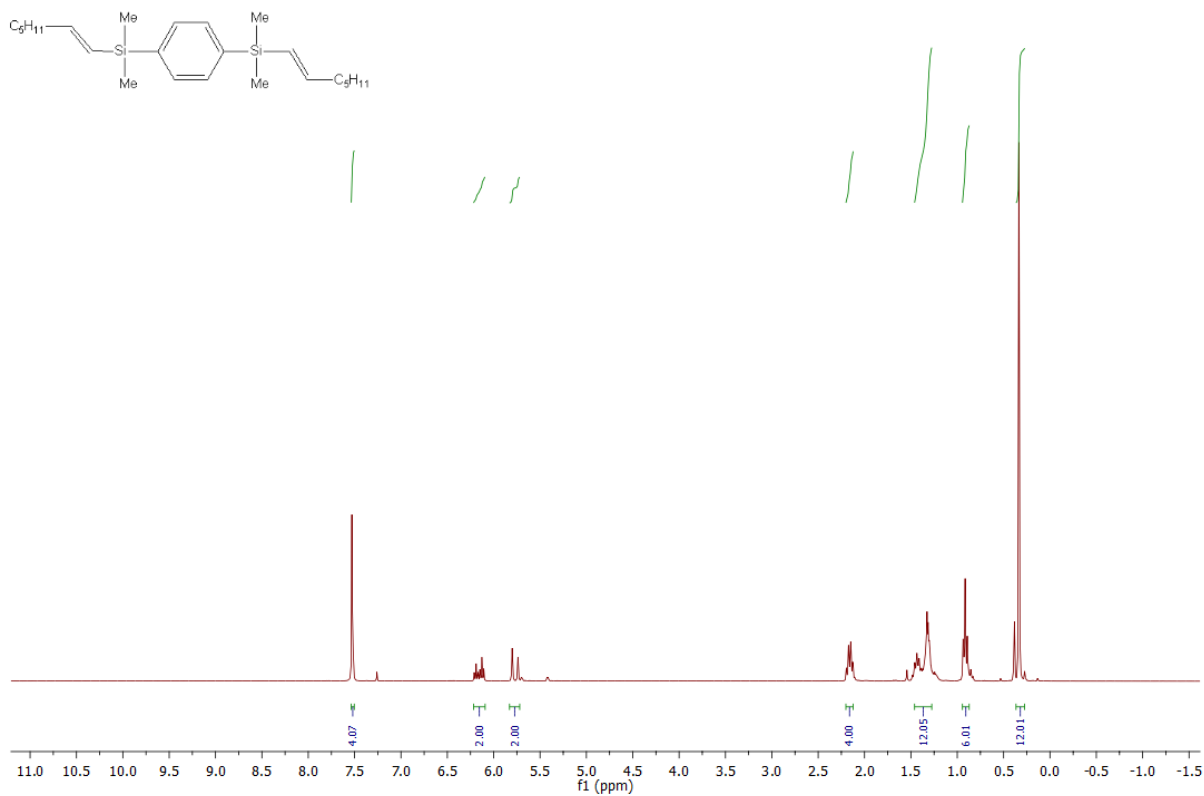

**Figure S64.** <sup>1</sup>H NMR (400 MHz, CDCl<sub>3</sub>) of product **24**

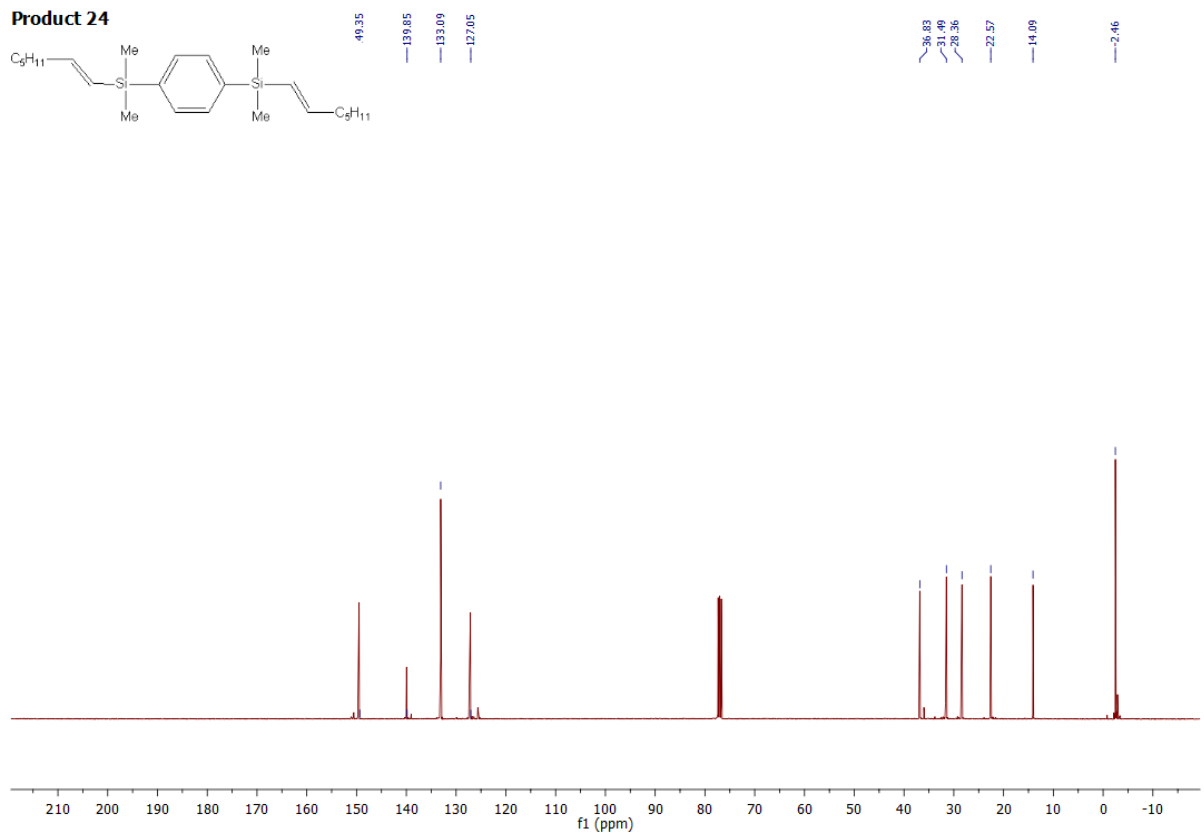

**Figure S65.** <sup>13</sup>C NMR (100 MHz, CDCl<sub>3</sub>) of product **24**

**Product 24**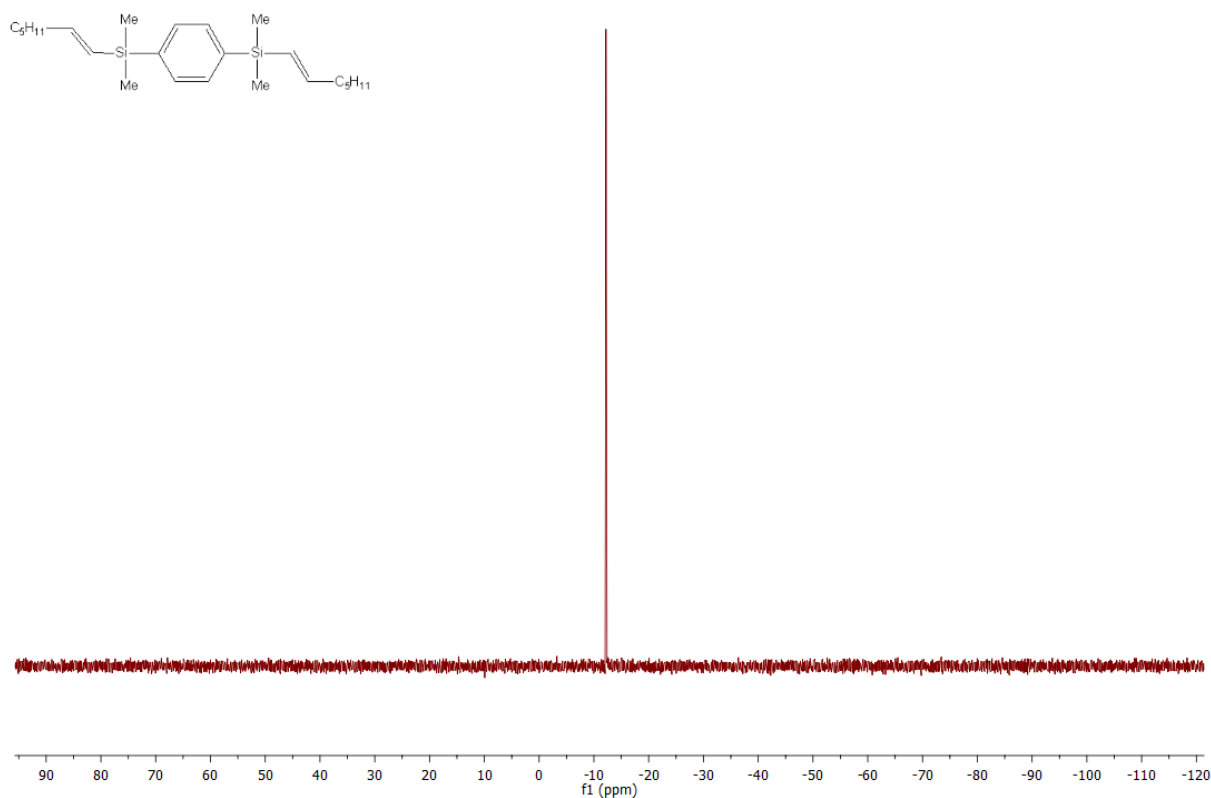**Figure S66.**  $^{29}\text{Si}$  NMR (79 MHz,  $\text{CDCl}_3$ ) of product 24*Analytical data of product 24:*

Isolated yield: 94% (399.4 mg);  $^1\text{H}$  NMR ( $\text{CDCl}_3$ ,  $\delta$ , ppm): 0.33 (s, 12H,  $\text{CH}_3$ ), 0.91 (t, 6H,  $J_{\text{HH}} = 6.7$  Hz,  $-(\text{CH}_2)_4\text{CH}_3$ ), 1.28 – 1.46 (m, 12H,  $-(\text{CH}_2)_4\text{CH}_3$ ), 2.12 – 2.20 (m, 4H,  $=\text{CHCH}_2$ ), 5.77 (d, 2H,  $J_{\text{HH}} = 18.6$  Hz,  $=\text{CHSi}$ ), 6.16 (dt, 2H,  $J_{\text{HH}} = 18.6, 6.2$  Hz,  $=\text{CHCH}_2$ ), 7.50 – 7.54 (m, 4H, Ph);  $^{13}\text{C}$  NMR ( $\text{CDCl}_3$ ,  $\delta$ , ppm): -2.46 ( $\text{CH}_3$ ), 14.09, 22.57, 28.36, 31.49, 36.83, 127.05, 133.09, 139.85, 149.35;  $^{29}\text{Si}$  NMR ( $\text{CDCl}_3$ ,  $\delta$ , ppm): -12.20; MS:  $m/z$  (rel. intensity): 59 (41), 73 (28), 95 (17), 99 (16), 131 (19), 155 (25), 159 (16), 179 (21), 193 (17), 215 (17), 217 (16), 231 (63), 232 (23), 275 (15), 290 (60), 291 (20), 314 (17), 327 (20), 329 (27), 371 (100), 372 (38), 373 (15), 386 (2,  $\text{M}^+$ ); anal. calcd. for  $\text{C}_{24}\text{H}_{42}\text{Si}_2$  (%): C: 74.53, H: 10.95; found: C: 74.60, H: 10.99.

Product 25

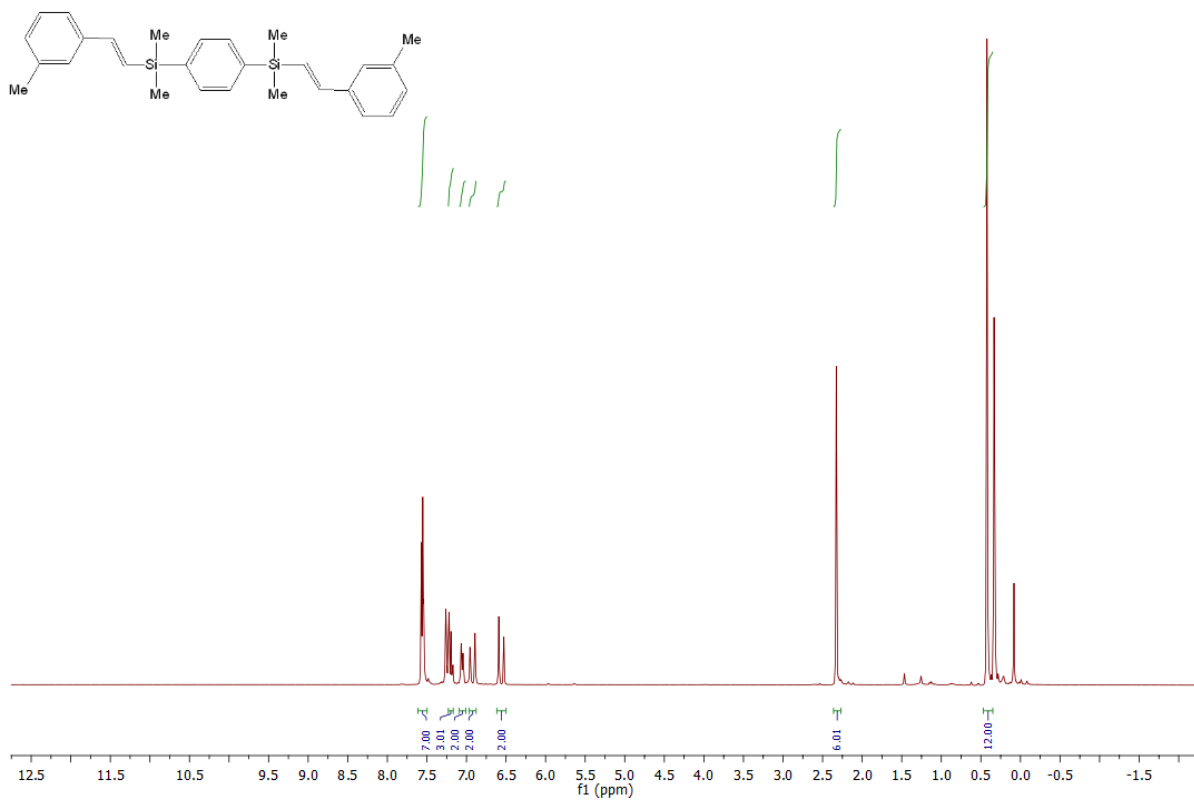

Figure S67. <sup>1</sup>H NMR (300 MHz, CDCl<sub>3</sub>) of product 25

Product 25

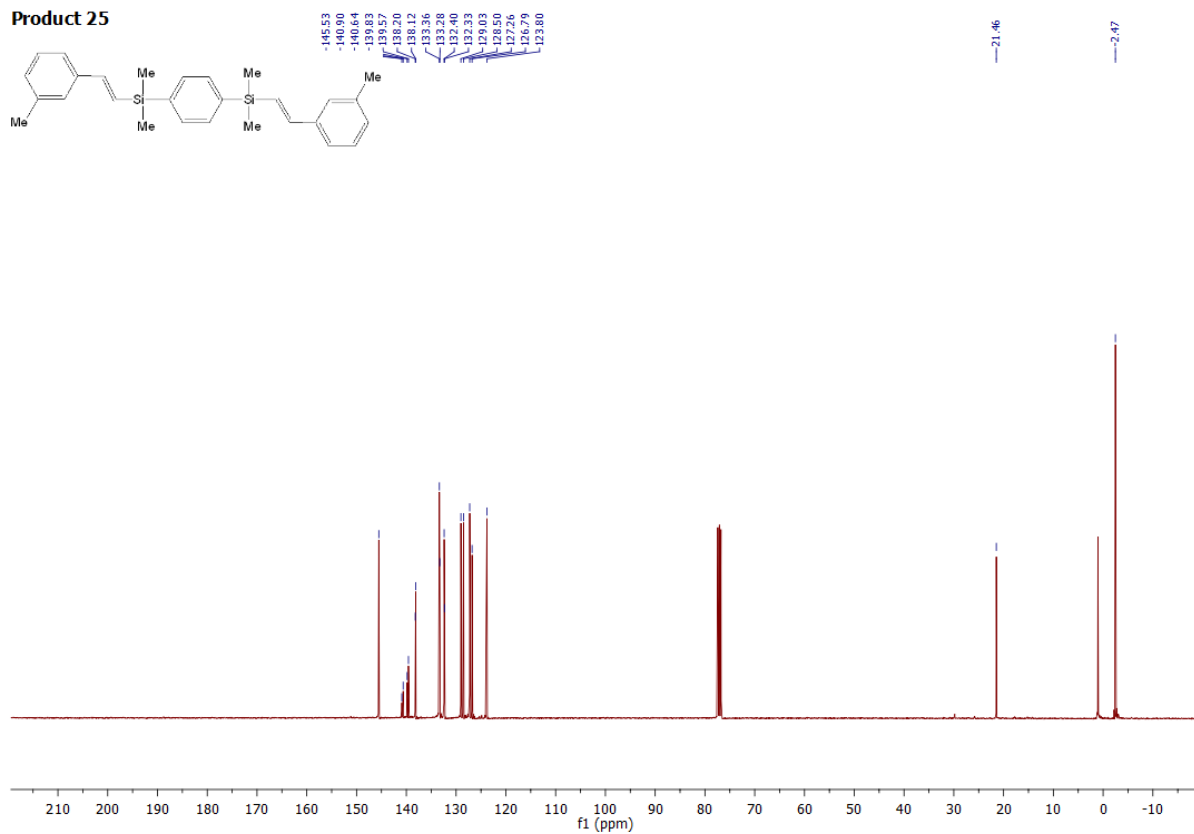

Figure S68. <sup>13</sup>C NMR (100 MHz, CDCl<sub>3</sub>) of product 25

**Product 25**

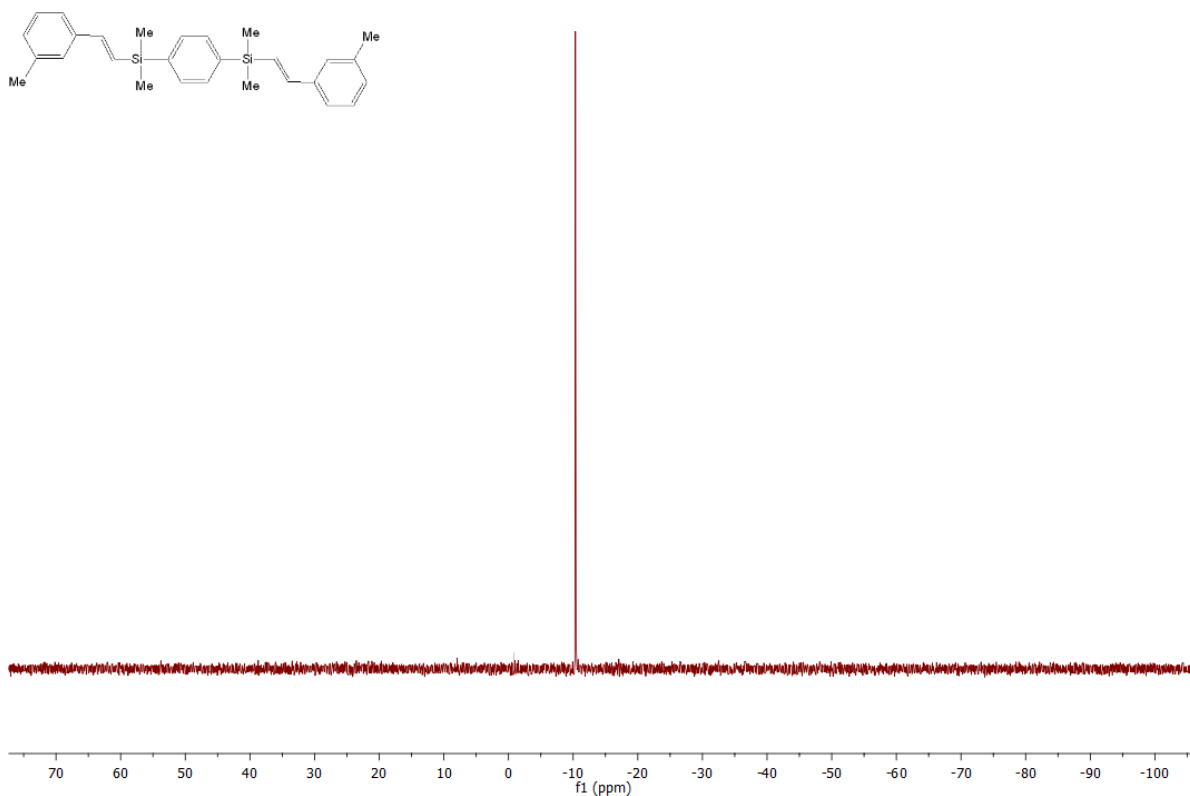

**Figure S69.** <sup>29</sup>Si NMR (79 MHz, CDCl<sub>3</sub>) of product **25**

*Analytical data of product 25:*

Isolated yield: 90% (422 mg); <sup>1</sup>H NMR (CDCl<sub>3</sub>, δ, ppm): 0.42 (s, 12H, CH<sub>3</sub>), 2.33 (s, 6H, CH<sub>3</sub>), 6.56 (d, 2H, *J*<sub>HH</sub> = 19.1 Hz, =CHSi), 7.01 (d, 2H, *J*<sub>HH</sub> = 19.1 Hz, =CH), 7.05 (2H, *J*<sub>HH</sub> = 6.9 Hz, -C<sub>6</sub>H<sub>4</sub>-), 7.17 – 7.23 (m, 3H, -C<sub>6</sub>H<sub>4</sub>-), 7.50 – 7.61 (m, 7H, -C<sub>6</sub>H<sub>4</sub>-); <sup>13</sup>C NMR (CDCl<sub>3</sub>, δ, ppm): -2.42 (SiCH<sub>3</sub>), 21.46 (CH<sub>3</sub>), 123.80, 126.79, 128.50, 129.03, 132.37 (d, *J* = 6.7 Hz), 133.32 (d, *J* = 7.9 Hz), 138.16 (d, *J* = 8.8 Hz), 139.57, 139.83, 140.64, 140.90, 145.53; <sup>29</sup>Si NMR (CDCl<sub>3</sub>, δ, ppm): -10.42; MS: *m/z* (rel. intensity): 59 (19), 115 (10), 149 (11), 157 (16), 158 (25), 159 (65), 160 (24), 161 (12), 173 (20), 175 (36), 176 (16), 217 (11), 230 (13), 231 (21), 232 (100), 234 (51), 235 (20), 236 (12), 237 (12), 251 (34), 252 (22), 310 (15), 319 (12), 334 (30), 335 (13), 353 (15), 411 (83), 412 (34), 413 (14), 426 (6, M<sup>+</sup>); anal. calcd. for C<sub>28</sub>H<sub>34</sub>Si<sub>2</sub> (%): C: 78.81, H: 8.03; found: C: 78.95, H: 8.14.

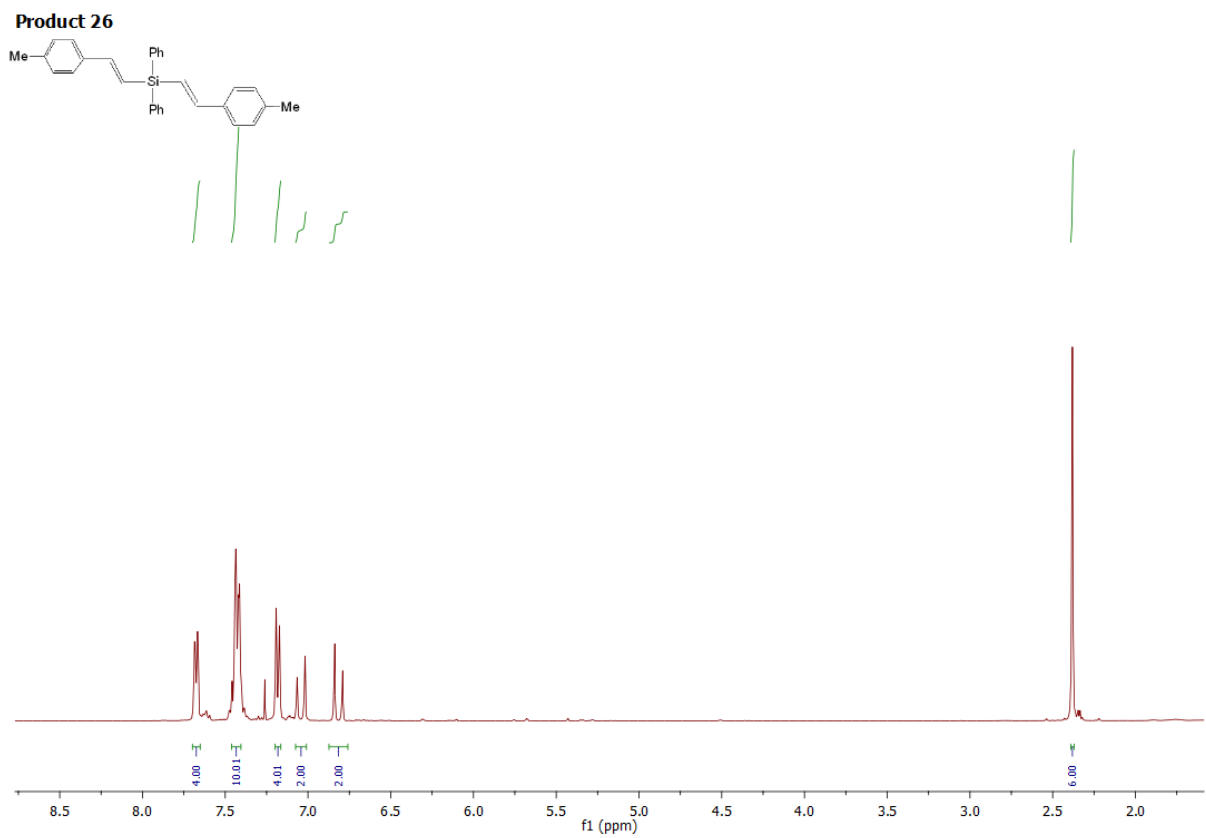

**Figure S70.**  $^1\text{H}$  NMR (300 MHz,  $\text{CDCl}_3$ ) of product **26**

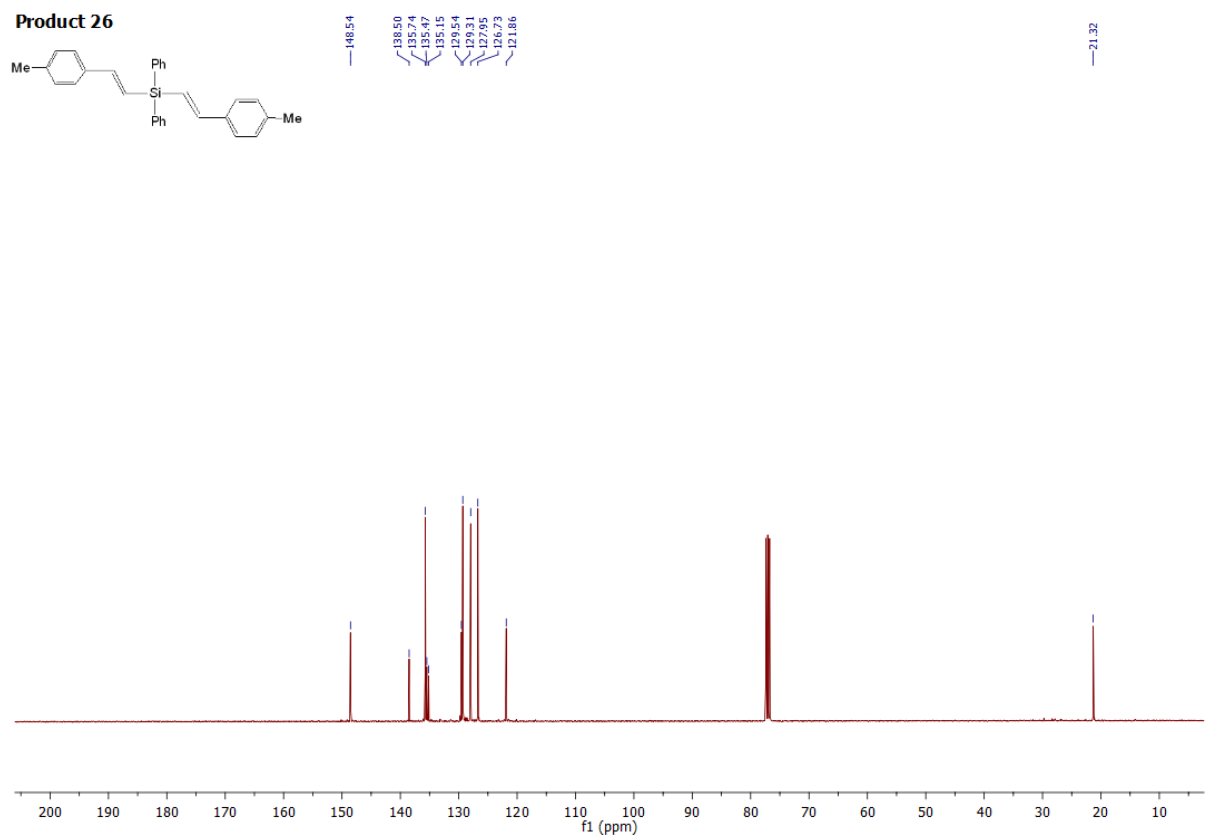

**Figure S71.**  $^{13}\text{C}$  NMR (100 MHz,  $\text{CDCl}_3$ ) of product **26**



**Product 26**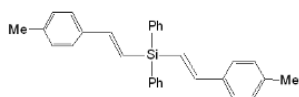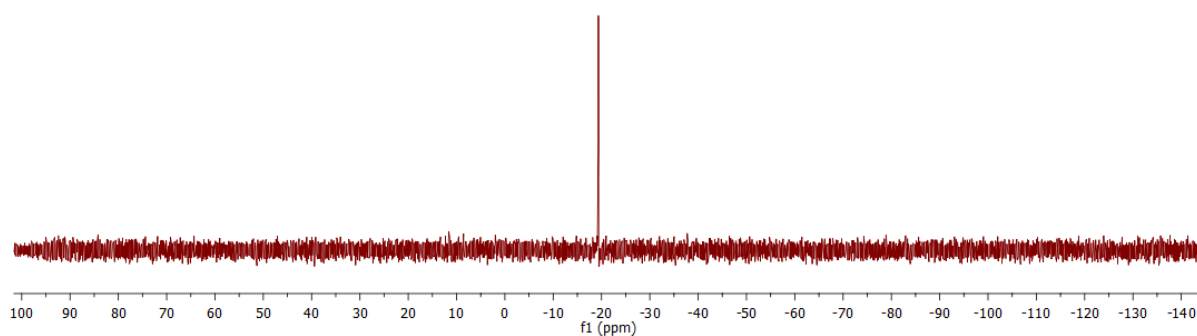

**Figure S72.**  $^{29}\text{Si}$  NMR (79 MHz,  $\text{CDCl}_3$ ) of product **26**

*Analytical data of product 26:*

Isolated yield: 90% (412 mg);  $^1\text{H}$  NMR ( $\text{CDCl}_3$ ,  $\delta$ , ppm): 2.38 (s, 6H,  $\text{CH}_3$ ), 6.81 (d, 2H,  $J_{\text{HH}} = 19.1$  Hz,  $=\text{CHSi}$ ), 7.04 (d, 2H,  $J_{\text{HH}} = 19.1$  Hz,  $=\text{CH}$ ), 7.18 (d, 4H,  $J_{\text{HH}} = 7.9$  Hz,  $-\text{C}_6\text{H}_4-$ ), 7.39 – 7.48 (m, 10H, Ph), 7.63 – 7.71 (m, 4H, Ph);  $^{13}\text{C}$  NMR ( $\text{CDCl}_3$ ,  $\delta$ , ppm): 21.32 ( $\text{CH}_3$ ), 121.86, 126.73, 127.95, 129.31, 129.54, 135.15, 135.47, 135.74, 138.50, 148.54;  $^{29}\text{Si}$  NMR ( $\text{CDCl}_3$ ,  $\delta$ , ppm): -19.37; MS:  $m/z$  (rel. intensity): 105 (18), 144 (17), 181 (16), 219 (16), 220 (20), 221 (39), 222 (24), 234 (20), 235 (23), 299 (22), 312 (100), 313 (46), 314 (15), 324 (42), 325 (69), 326 (18), 338 (47), 339 (85), 340 (928), 416 (18,  $\text{M}^+$ ); anal. calcd. for  $\text{C}_{30}\text{H}_{28}\text{Si}$  (%): C: 86.48, H: 6.77; found: C: 86.37, H: 6.66.

**Product 27**

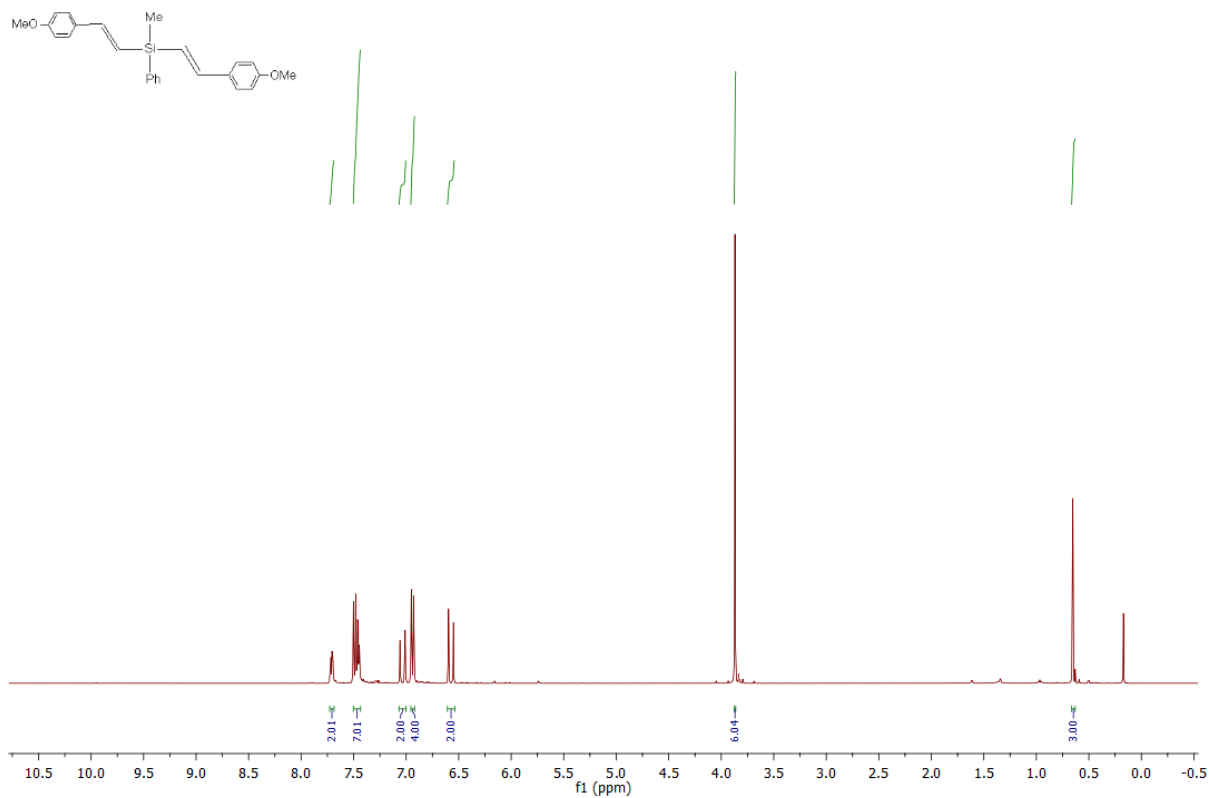

**Figure S73.** <sup>1</sup>H NMR (400 MHz, CDCl<sub>3</sub>) of product 27

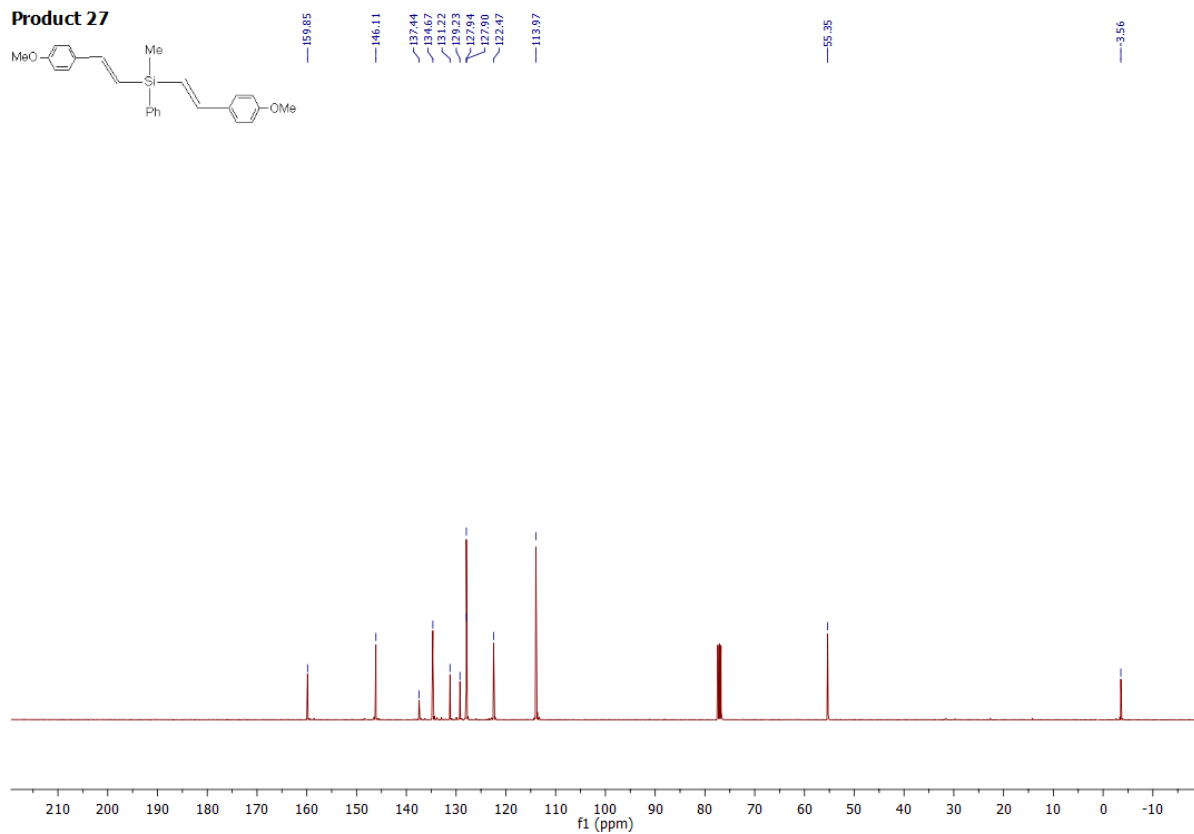

**Figure S74.** <sup>13</sup>C NMR (100 MHz, CDCl<sub>3</sub>) of product 27

**Product 27**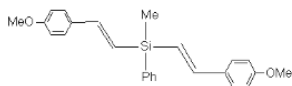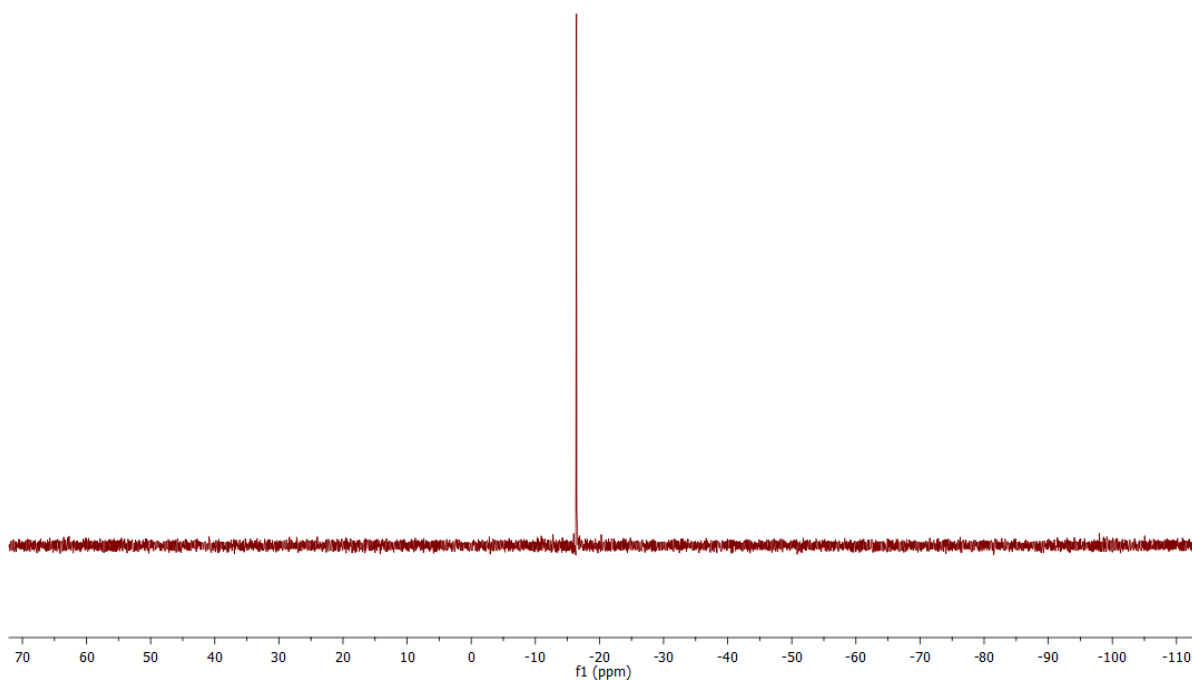

**Figure S75.**  $^{29}\text{Si}$  NMR (79 MHz,  $\text{CDCl}_3$ ) of product **27**

*Analytical data of product 27:*

Isolated yield: 89% (378 mg);  $^1\text{H}$  NMR ( $\text{CDCl}_3$ ,  $\delta$ , ppm): 0.65 (s, 3H,  $\text{CH}_3$ ), 3.87 (s, 6H,  $\text{OCH}_3$ ), 6.57 (d, 2H,  $J_{\text{HH}} = 19.1$  Hz,  $=\text{CHSi}$ ), 6.94 (d, 4H,  $J_{\text{HH}} = 8.8$  Hz,  $-\text{C}_6\text{H}_4-$ ), 7.03 (d, 2H,  $J_{\text{HH}} = 19.1$  Hz,  $=\text{CH}$ ), 7.43 – 7.50 (m, 7H,  $-\text{C}_6\text{H}_4-$  and Ph), 7.69 – 7.73 (m, 2H, Ph);  $^{13}\text{C}$  NMR ( $\text{CDCl}_3$ ,  $\delta$ , ppm): -3.56 ( $\text{CH}_3$ ), 55.35 ( $\text{OCH}_3$ ), 113.97, 122.47, 127.92 (d,  $J = 3.8$  Hz), 129.23, 131.22, 134.67, 137.44, 146.11, 159.85;  $^{29}\text{Si}$  NMR ( $\text{CDCl}_3$ ,  $\delta$ , ppm): -16.42; MS:  $m/z$  (rel. intensity): 105 (13), 121 (29), 175 (16), 176 (14), 238 (21), 254 (91), 264 (24), 265 (100), 266 (38), 267 (20), 278 (25), 296 (20), 310 (15), 371 (85), 372 (25), 386 (22,  $\text{M}^+$ ).

**Product 28**

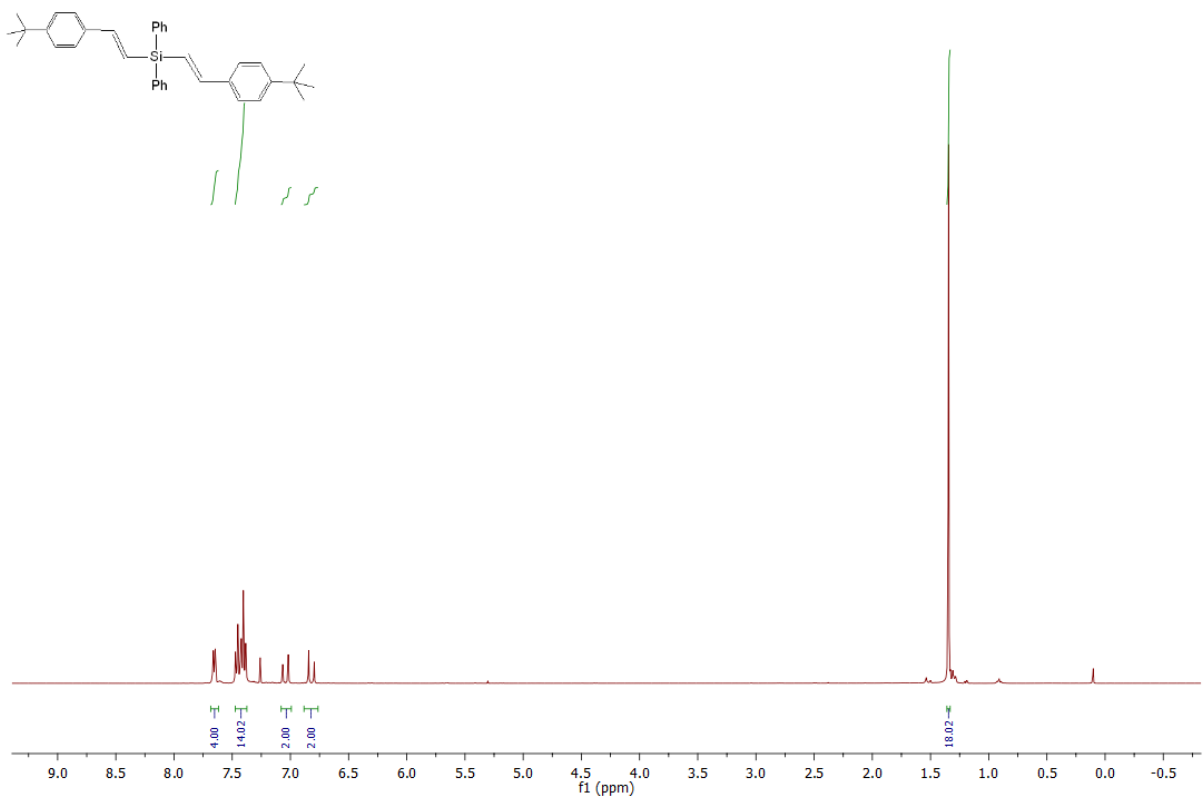

**Figure S76.** <sup>1</sup>H NMR (400 MHz, CDCl<sub>3</sub>) of product **28**

**Product 28**

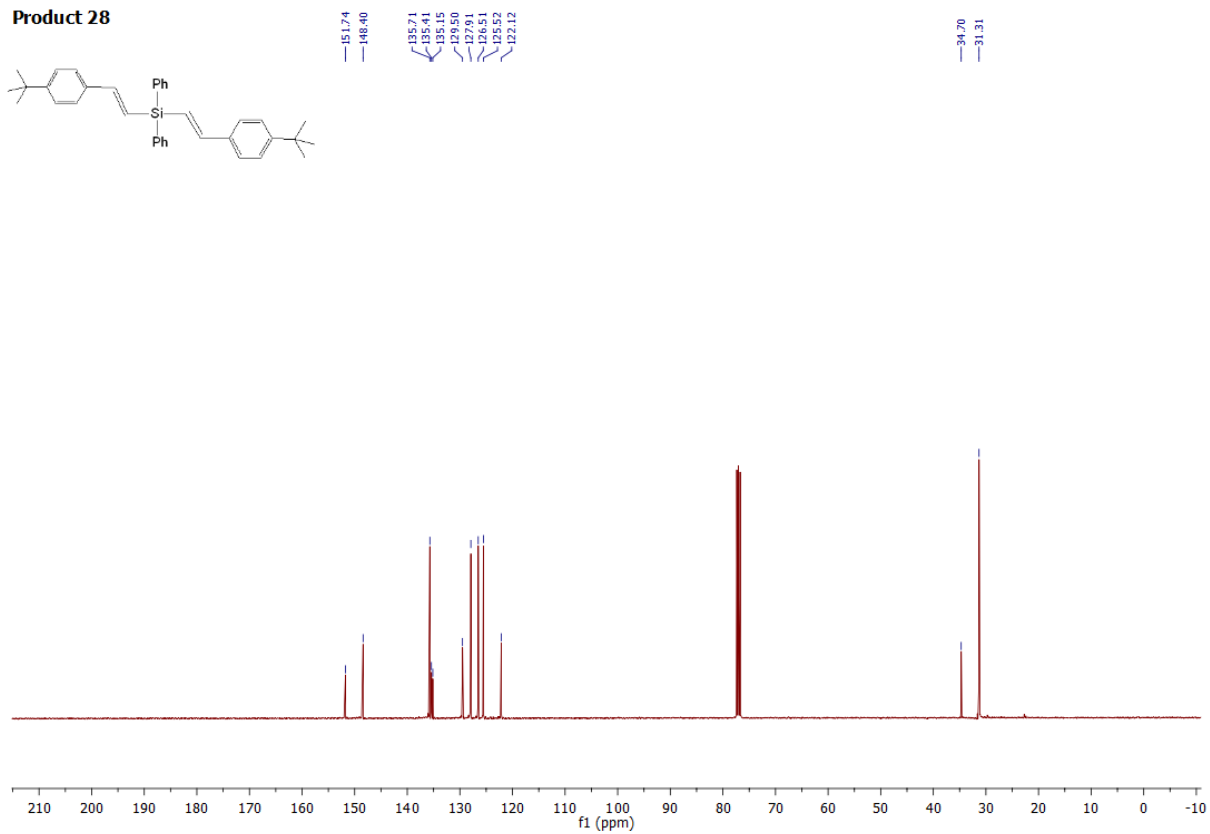

**Figure S77.** <sup>13</sup>C NMR (100 MHz, CDCl<sub>3</sub>) of product **28**

**Product 28**

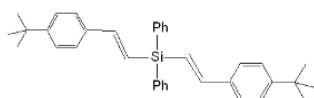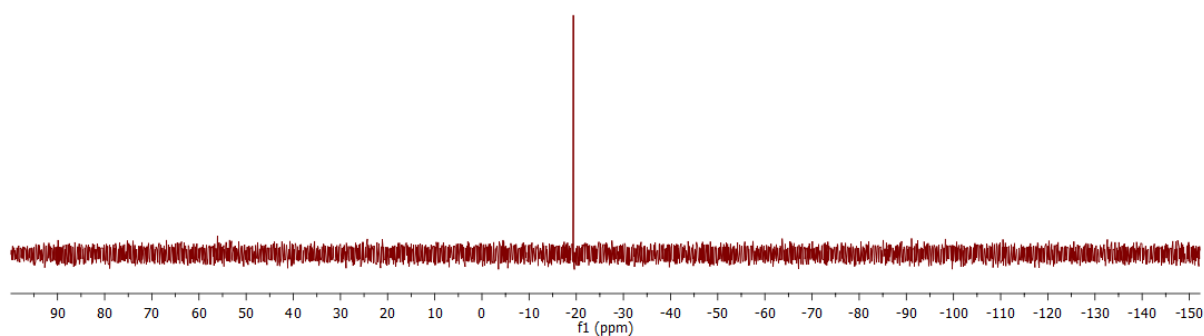

**Figure S78.**  $^{29}\text{Si}$  NMR (79 MHz,  $\text{CDCl}_3$ ) of product **28**

*Analytical data of product 28:*

Isolated yield: 91% (500.8 mg);  $^1\text{H}$  NMR ( $\text{CDCl}_3$ ,  $\delta$ , ppm): 1.34 (s, 18H,  $\text{C}(\text{CH}_3)_3$ ), 6.82 (d, 2H,  $J_{\text{HH}} = 19.1$  Hz,  $=\text{CHSi}$ ), 7.04 (d, 2H,  $J_{\text{HH}} = 19.1$  Hz,  $=\text{CH}$ ), 7.37 – 7.47 (m, 14H,  $-\text{C}_6\text{H}_4-$  and Ph), 7.62 – 7.69 (m, 4H, Ph);  $^{13}\text{C}$  NMR ( $\text{CDCl}_3$ ,  $\delta$ , ppm): 31.31 ( $\text{C}(\text{CH}_3)_3$ ), 34.70 ( $\text{C}(\text{CH}_3)_3$ ), 122.12, 125.52, 126.51, 127.91, 129.50, 135.15, 135.41, 135.71, 148.40, 151.74;  $^{29}\text{Si}$  NMR ( $\text{CDCl}_3$ ,  $\delta$ , ppm): -19.38; MS:  $m/z$  (rel. intensity): 57 (39), 105 (10), 181 (12), 221 (17), 248 (12), 250 (26), 251 (10), 264 (174), 277 (14), 278 (32), 279 (15), 354 (100), 355 (47), 356 (11), 357 (17), 410 (59), 411 (22), 422 (18), 423 (34), 424 (13), 500 (15,  $\text{M}^+$ ); anal. calcd. for  $\text{C}_{36}\text{H}_{40}\text{Si}$  (%): C: 86.34, H: 8.05; found: C: 86.39, H: 8.12.

**Product 29**

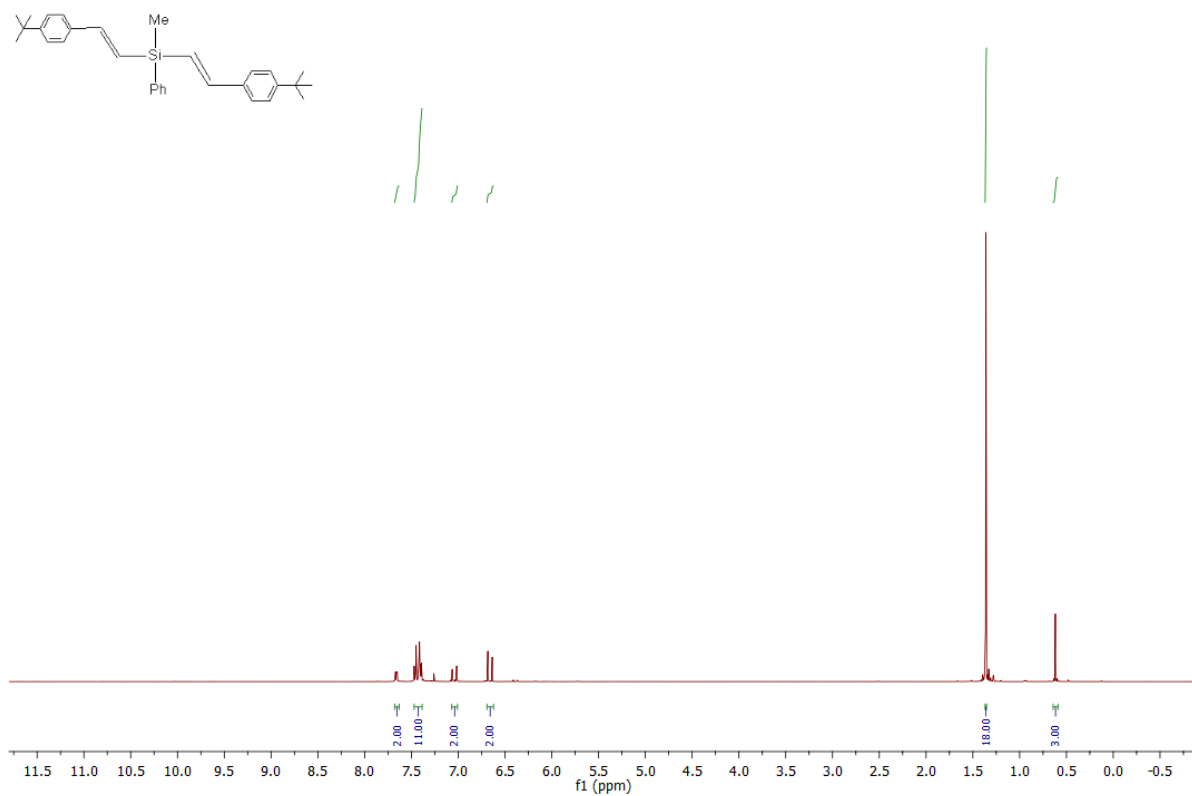

**Figure S79.** <sup>1</sup>H NMR (400 MHz, CDCl<sub>3</sub>) of product **29**

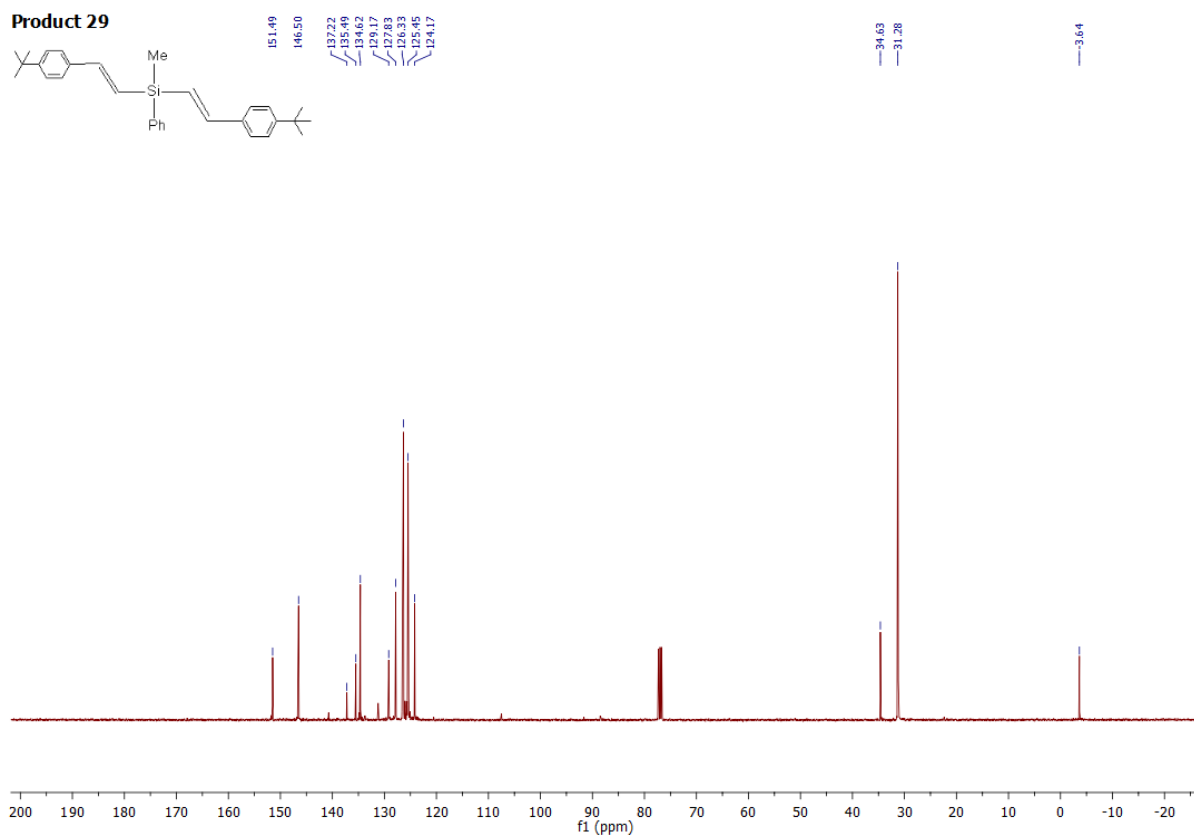

**Figure S80.** <sup>13</sup>C NMR (100 MHz, CDCl<sub>3</sub>) of product **29**

**Product 29**

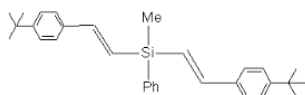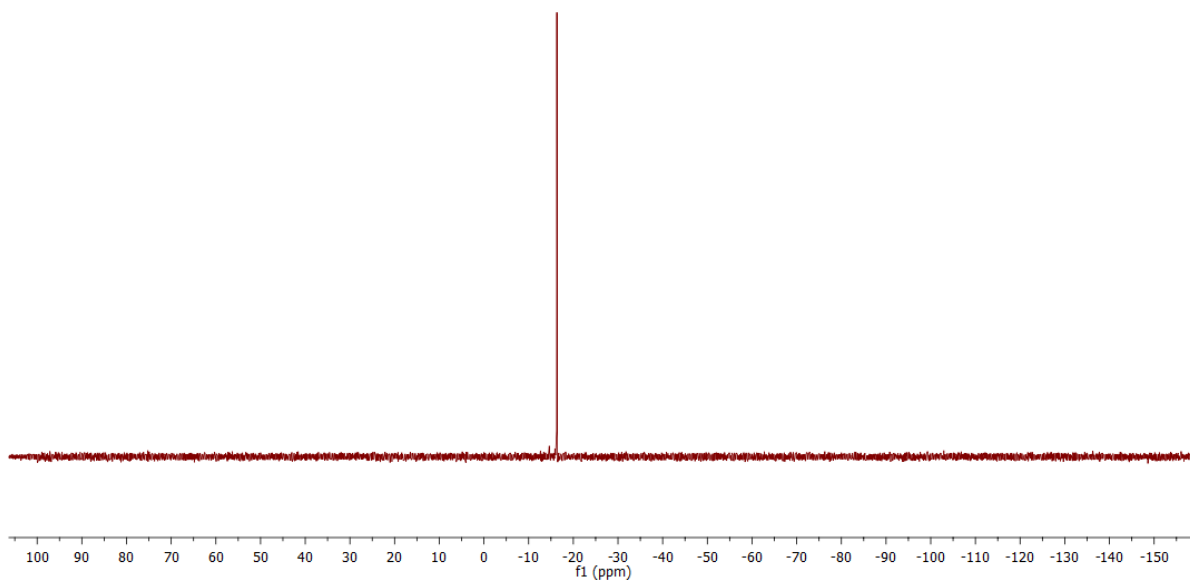

**Figure S81.**  $^{29}\text{Si}$  NMR (79 MHz,  $\text{CDCl}_3$ ) of product **29**

*Analytical data of product 29:*

Isolated yield: 92% (444 mg);  $^1\text{H}$  NMR ( $\text{CDCl}_3$ ,  $\delta$ , ppm): 0.62 (s, 3H,  $\text{CH}_3$ ), 1.36 (s, 18H,  $\text{C}(\text{CH}_3)_3$ ), 6.66 (d, 2H,  $J_{\text{HH}} = 19.1$  Hz,  $=\text{CHSi}$ ), 7.04 (d, 2H,  $J_{\text{HH}} = 19.1$  Hz,  $=\text{CH}$ ), 7.37 – 7.48 (m, 11H,  $-\text{C}_6\text{H}_4-$  and Ph), 7.64 – 7.69 (m, 2H, Ph);  $^{13}\text{C}$  NMR ( $\text{CDCl}_3$ ,  $\delta$ , ppm): -3.64 ( $\text{CH}_3$ ), 31.28 ( $\text{C}(\text{CH}_3)_3$ ), 34.63 ( $\text{C}(\text{CH}_3)_3$ ), 124.17, 125.45, 126.33, 127.83, 129.17, 134.62, 135.49, 137.22, 146.50, 151.49;  $^{29}\text{Si}$  NMR ( $\text{CDCl}_3$ ,  $\delta$ , ppm): -16.32; MS:  $m/z$  (rel. intensity): 57 (36), 263 (11), 290 (10), 292 (100), 293 (43), 304 (12), 348 (23), 361 (24), 423 (21), 438 (12,  $\text{M}^+$ ).

Product 30

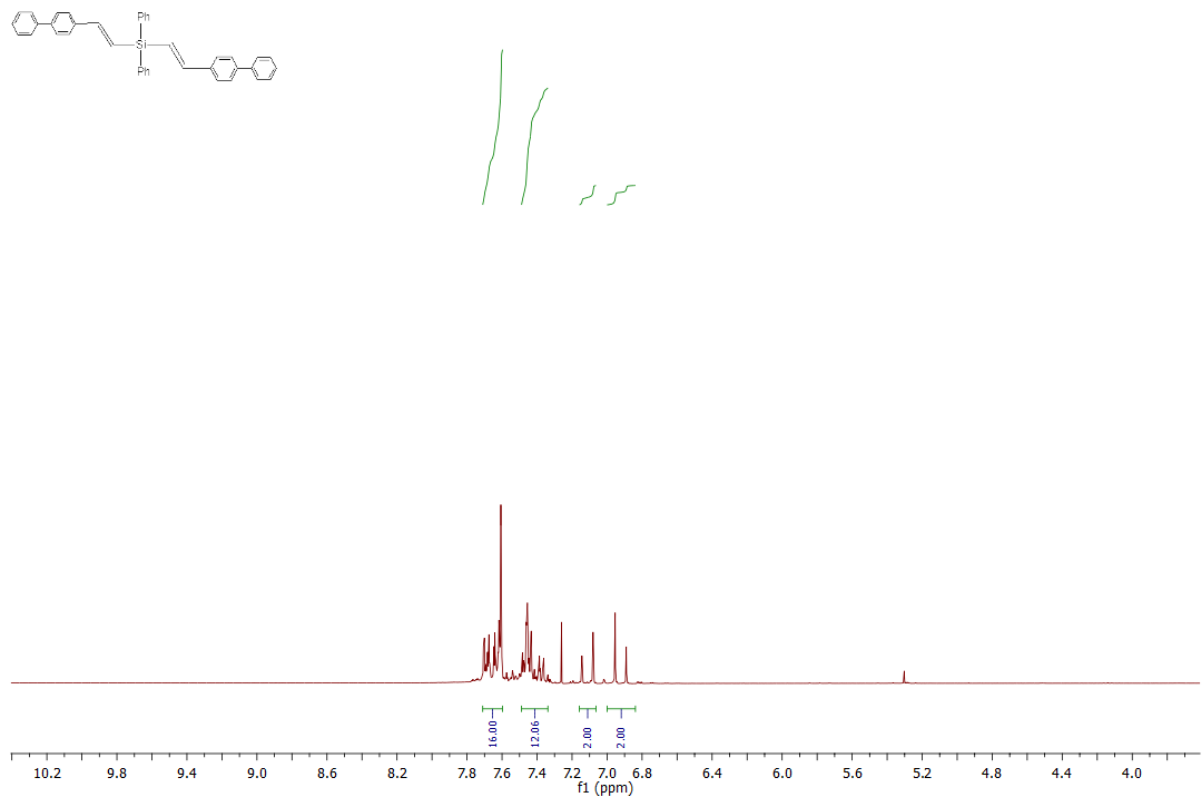

Figure S82. <sup>1</sup>H NMR (400 MHz, CDCl<sub>3</sub>) of product 30

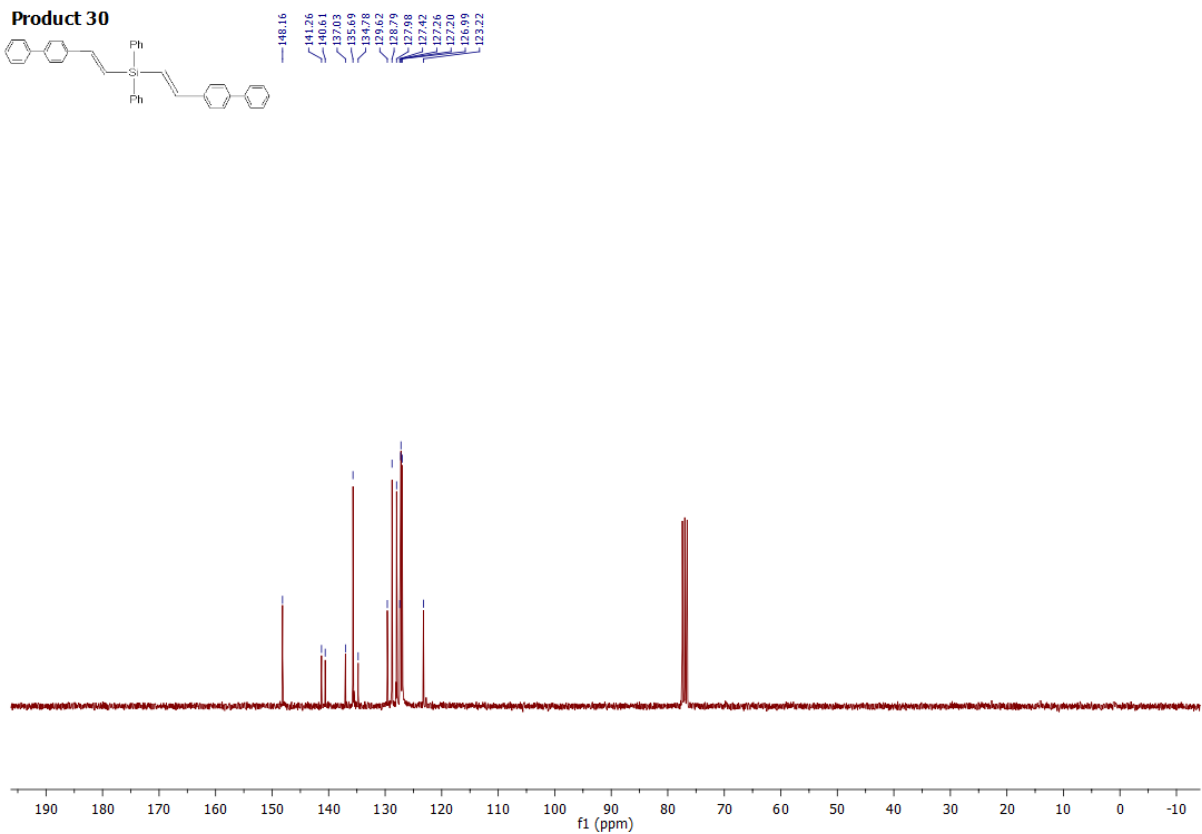

Figure S83. <sup>13</sup>C NMR (100 MHz, CDCl<sub>3</sub>) of product 30



**Product 30**

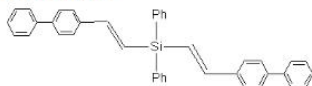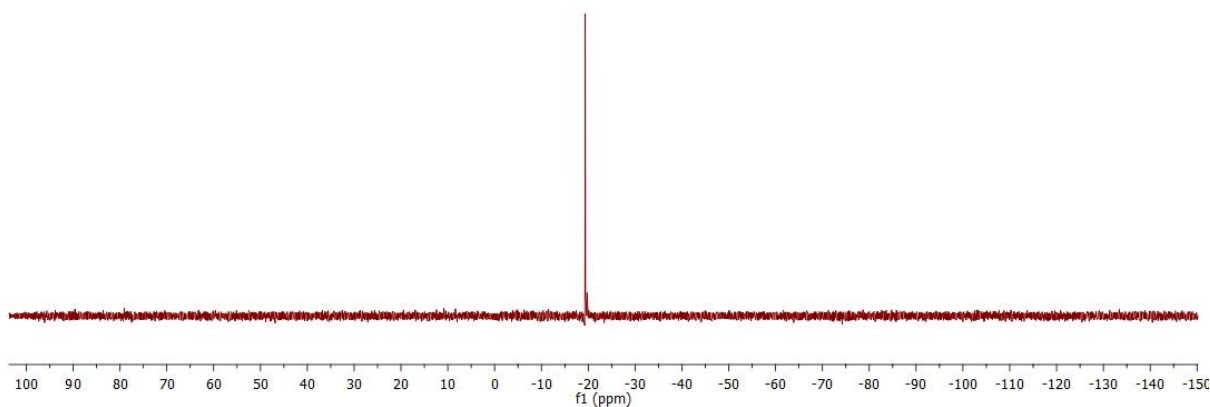

**Figure S84.**  $^{29}\text{Si}$  NMR (79 MHz,  $\text{CDCl}_3$ ) of product **30**

*Analytical data of product 30:*

Isolated yield: 89% (528.9 mg);  $^1\text{H}$  NMR ( $\text{CDCl}_3$ ,  $\delta$ , ppm): 6.92 (d, 2H,  $J_{\text{HH}} = 19.1$  Hz, =CHSi), 7.11 (d, 2H,  $J_{\text{HH}} = 19.1$  Hz, =CH), 7.34 – 7.49 (m, 12H, Ar), 7.60 – 7.71 (m, 16H, Ar);  $^{13}\text{C}$  NMR ( $\text{CDCl}_3$ ,  $\delta$ , ppm): 123.22, 126.99, 127.20, 127.26, 127.42, 127.98, 128.79, 129.62, 134.78, 135.69, 137.03, 140.61, 141.26, 148.16;  $^{29}\text{Si}$  NMR ( $\text{CDCl}_3$ ,  $\delta$ , ppm): -19.36; MS:  $m/z$  (rel. intensity): 49 (21), 73 (45), 91 (49), 105 (20), 207 (60), 208 (23), 209 (29), 281 (37), 282 (20), 283 (32), 284 (36), 297 (34), 355 (35), 373 (100), 374 (100), 386 (30), 429 (30), 464 (24), 540 (14,  $\text{M}^+$ ); anal. calcd. for  $\text{C}_{40}\text{H}_{32}\text{Si}$  (%): C: 88.84, H: 5.96; found: C: 89.02, H: 6.12.

Product 31

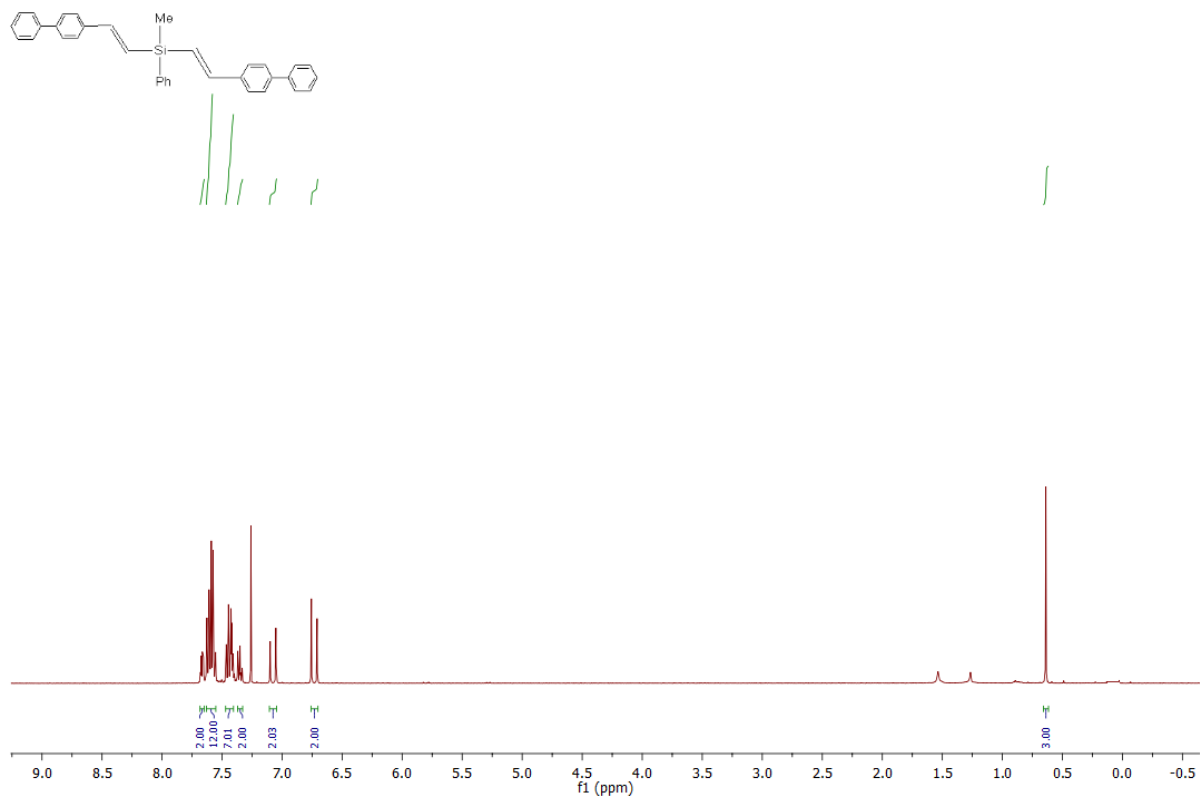

Figure S85. <sup>1</sup>H NMR (400 MHz, CDCl<sub>3</sub>) of product 31

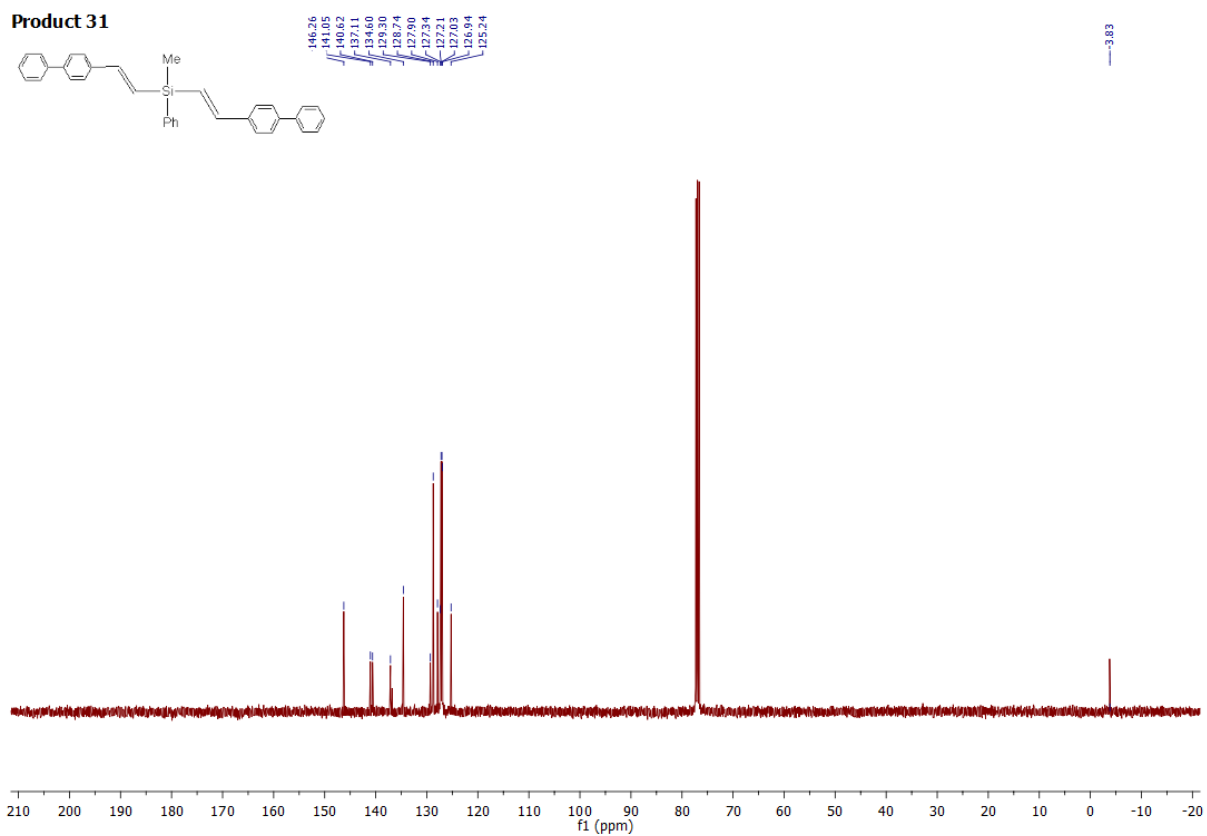

Figure S86. <sup>13</sup>C NMR (100 MHz, CDCl<sub>3</sub>) of product 31

**Product 31**

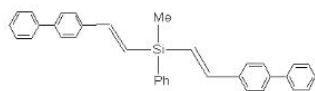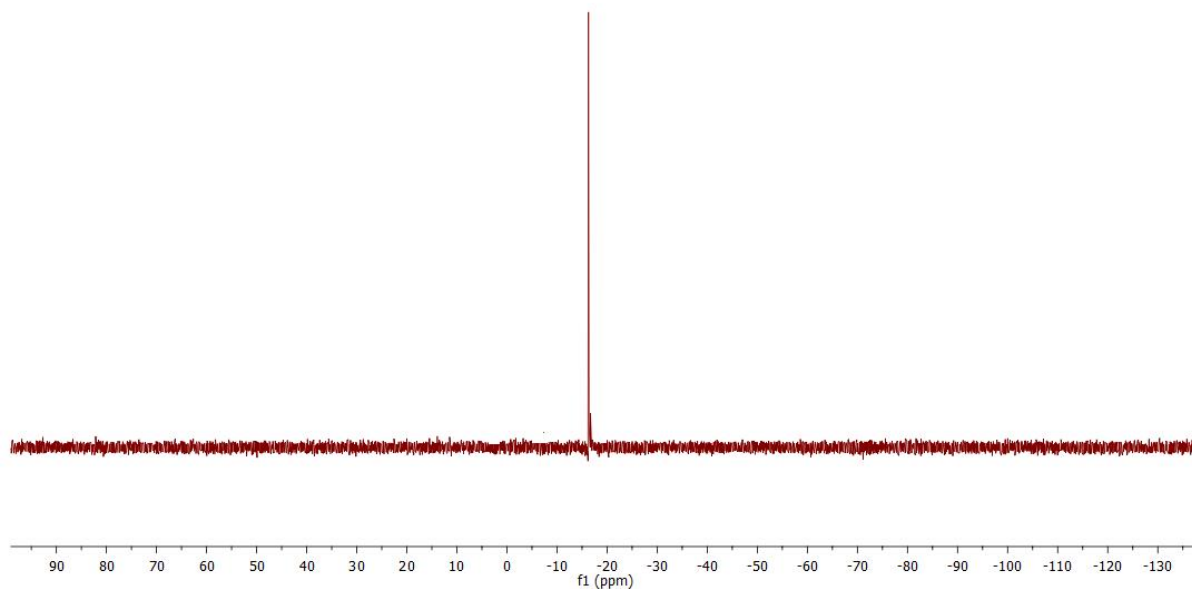

**Figure S87.**  $^{29}\text{Si}$  NMR (79 MHz,  $\text{CDCl}_3$ ) of product **31**

*Analytical data of product 31:*

Isolated yield: 87% (457.6 mg);  $^1\text{H}$  NMR ( $\text{CDCl}_3$ ,  $\delta$ , ppm): 0.64 (s, 3H,  $\text{CH}_3$ ), 6.73 (d, 2H,  $J_{\text{HH}} = 19.1$  Hz,  $=\text{CHSi}$ ), 7.08 (d, 2H,  $J_{\text{HH}} = 19.1$  Hz,  $=\text{CH}$ ), 7.33 – 7.37 (m, 2H, Ar), 7.40 – 7.47 (m, 7H, Ar), 7.55 – 7.63 (m, 12H, Ar), 7.65 – 7.68 (m, 2H, Ar);  $^{13}\text{C}$  NMR ( $\text{CDCl}_3$ ,  $\delta$ , ppm): -3.83 ( $\text{CH}_3$ ), 125.24, 126.94, 127.03, 127.21, 127.34, 127.90, 128.74, 129.30, 134.60, 137.11, 140.62, 141.05, 146.26;  $^{29}\text{Si}$  NMR ( $\text{CDCl}_3$ ,  $\delta$ , ppm): -16.29; MS:  $m/z$  (rel. intensity): 105 (12), 208 (12), 221 (12), 222 (15), 284 (20), 312 (100), 312 (42), 314 (12), 324 (16), 360 (10), 387 (21), 388 (11), 400 (11), 402 (12), 478 (18,  $\text{M}^+$ ); anal. calcd. for  $\text{C}_{35}\text{H}_{30}\text{Si}$  (%): C: 87.82, H: 6.32; found: C: 87.75, H: 6.26.

Product 32

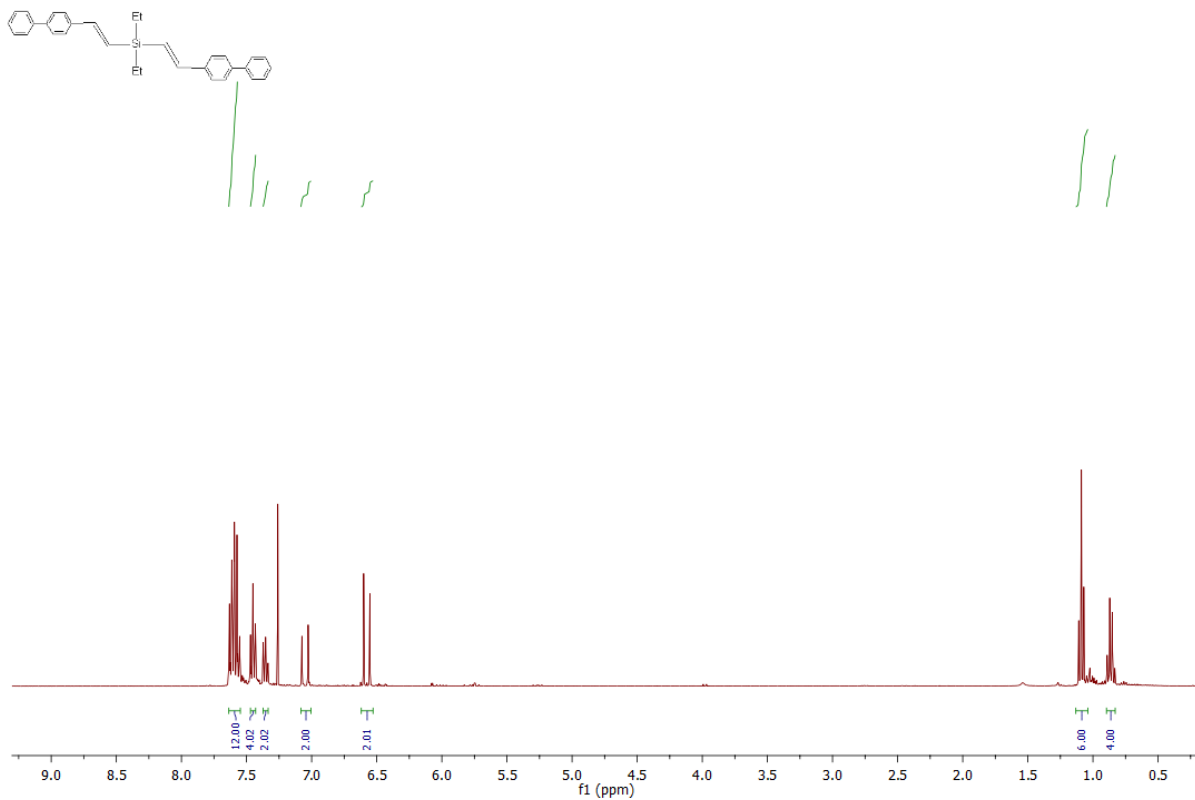

Figure S88. <sup>1</sup>H NMR (400 MHz, CDCl<sub>3</sub>) of product 32

Product 32

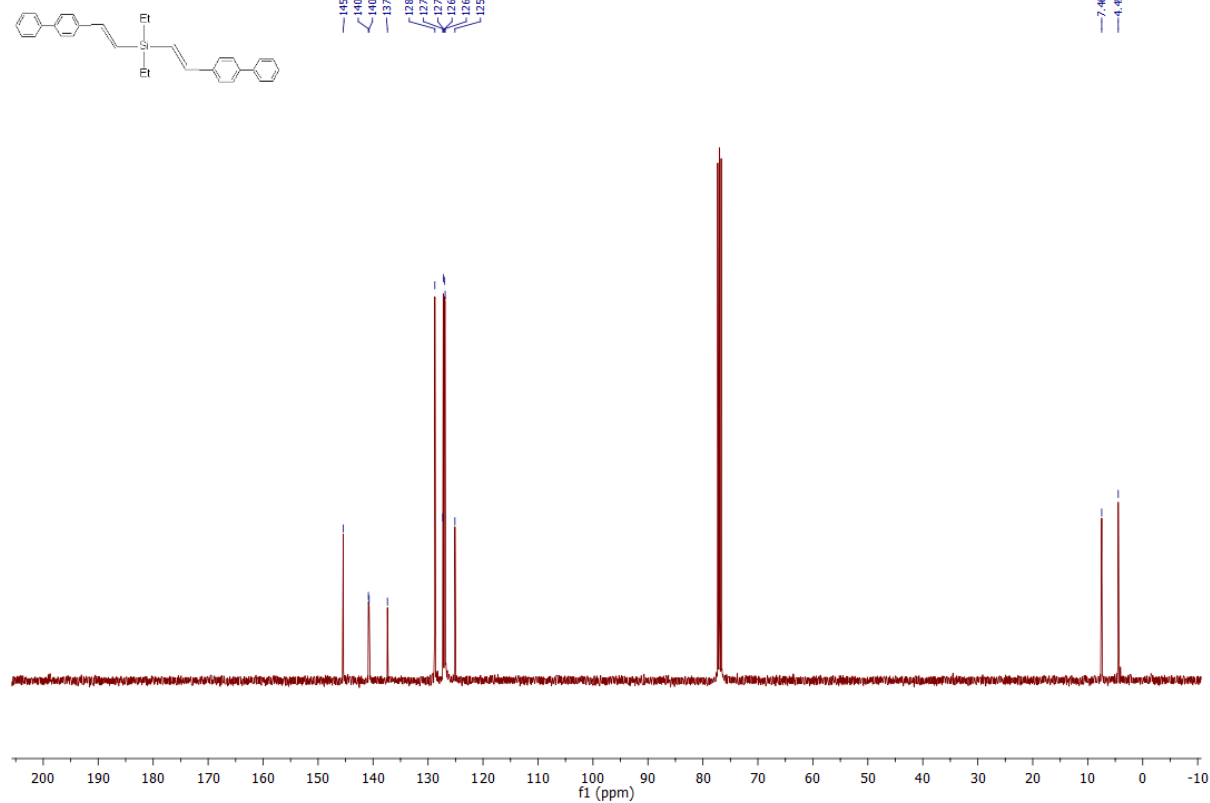

Figure S89. <sup>13</sup>C NMR (100 MHz, CDCl<sub>3</sub>) of product 32

**Product 32**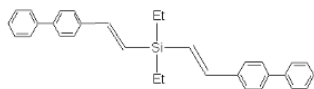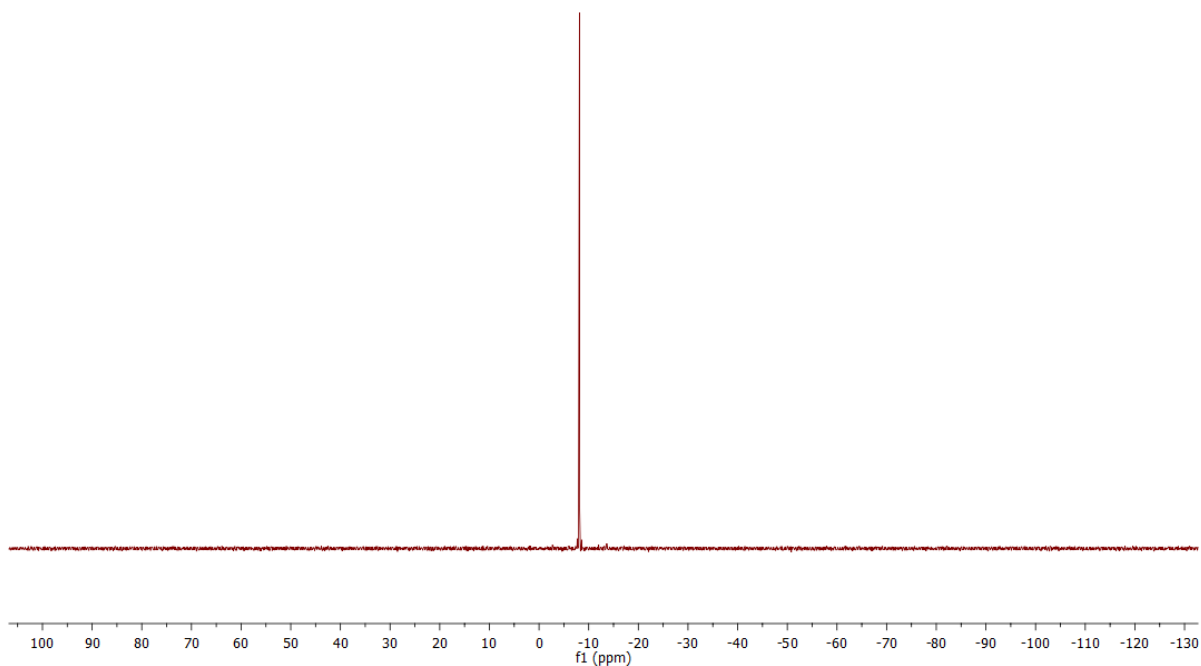**Figure S90.**  $^{29}\text{Si}$  NMR (79 MHz,  $\text{CDCl}_3$ ) of product **32***Analytical data of product 32:*

Isolated yield: 88% (430 mg);  $^1\text{H}$  NMR ( $\text{CDCl}_3$ ,  $\delta$ , ppm): 0.86 (q, 4H,  $J_{\text{HH}} = 7.8$  Hz,  $\text{CH}_3\text{CH}_2^-$ ), 1.09 (t, 6H,  $J_{\text{HH}} = 7.9$  Hz,  $\text{CH}_3\text{CH}_2^-$ ), 6.58 (d, 2H,  $J_{\text{HH}} = 19.2$  Hz,  $=\text{CHSi}$ ), 7.05 (d, 2H,  $J_{\text{HH}} = 19.2$  Hz,  $=\text{CH}$ ), 7.33 – 7.37 (m, 2H, Ar), 7.43 – 7.47 (m, 4H, Ar), 7.55 – 7.64 (m, 12H, Ar);  $^{13}\text{C}$  NMR ( $\text{CDCl}_3$ ,  $\delta$ , ppm): 4.45 ( $\text{CH}_3$ ), 7.46 ( $\text{CH}_2$ ), 125.11, 126.88, 126.96, 127.22, 127.32, 128.76, 137.38, 140.71, 140.85, 145.42;  $^{29}\text{Si}$  NMR ( $\text{CDCl}_3$ ,  $\delta$ , ppm): -8.14; MS:  $m/z$  (rel. intensity): 165 (16), 178 (18), 179 (12), 180 (28), 181 (36), 182 (11), 197 (15), 205 (18), 207 (12), 208 (21), 225 (25), 226 (14), 234 (19), 235 (100), 236 (32), 276 (16), 277 (57), 278 (27), 415 (85), 416 (24), 444 (2,  $\text{M}^+$ ); anal. calcd. for  $\text{C}_{32}\text{H}_{32}\text{Si}$  (%): C: 86.43, H: 7.25; found: C: 86.35, H: 7.18.

**Product 33**

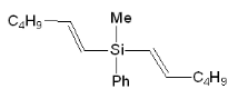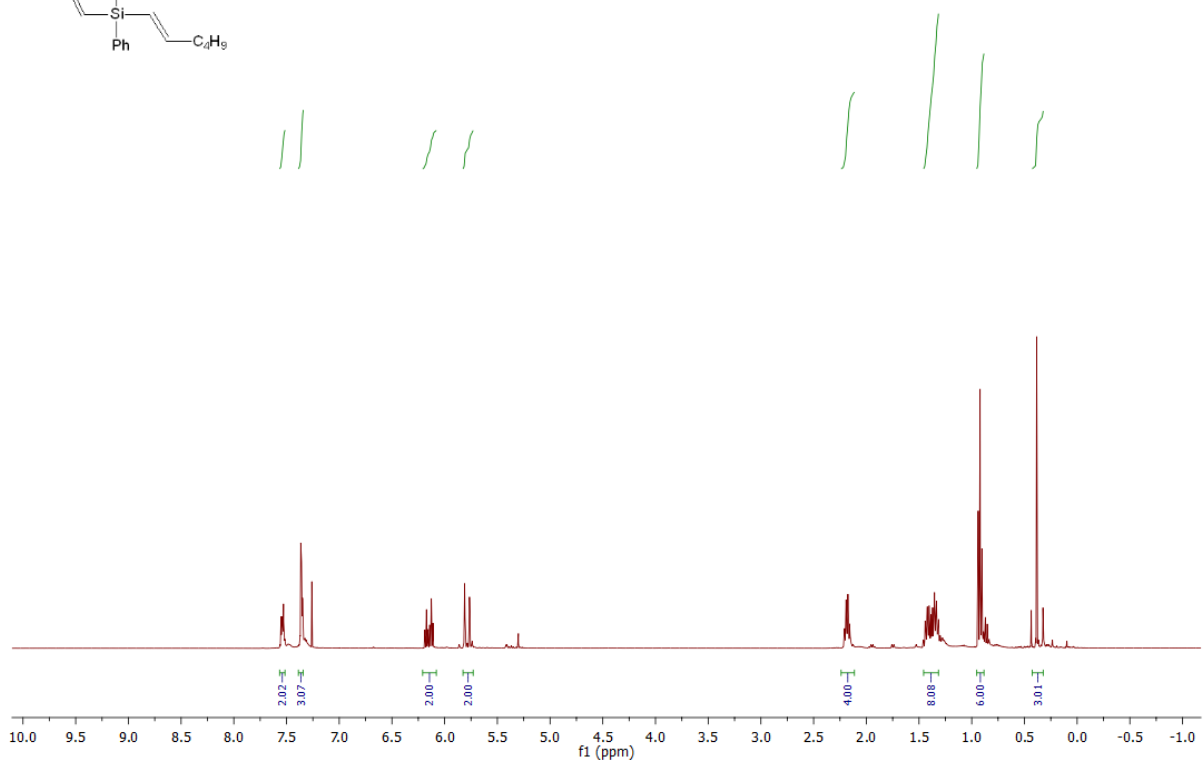

**Figure S91.** <sup>1</sup>H NMR (400 MHz, CDCl<sub>3</sub>) of product **33**

**Product 33**

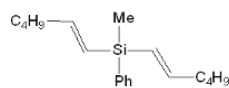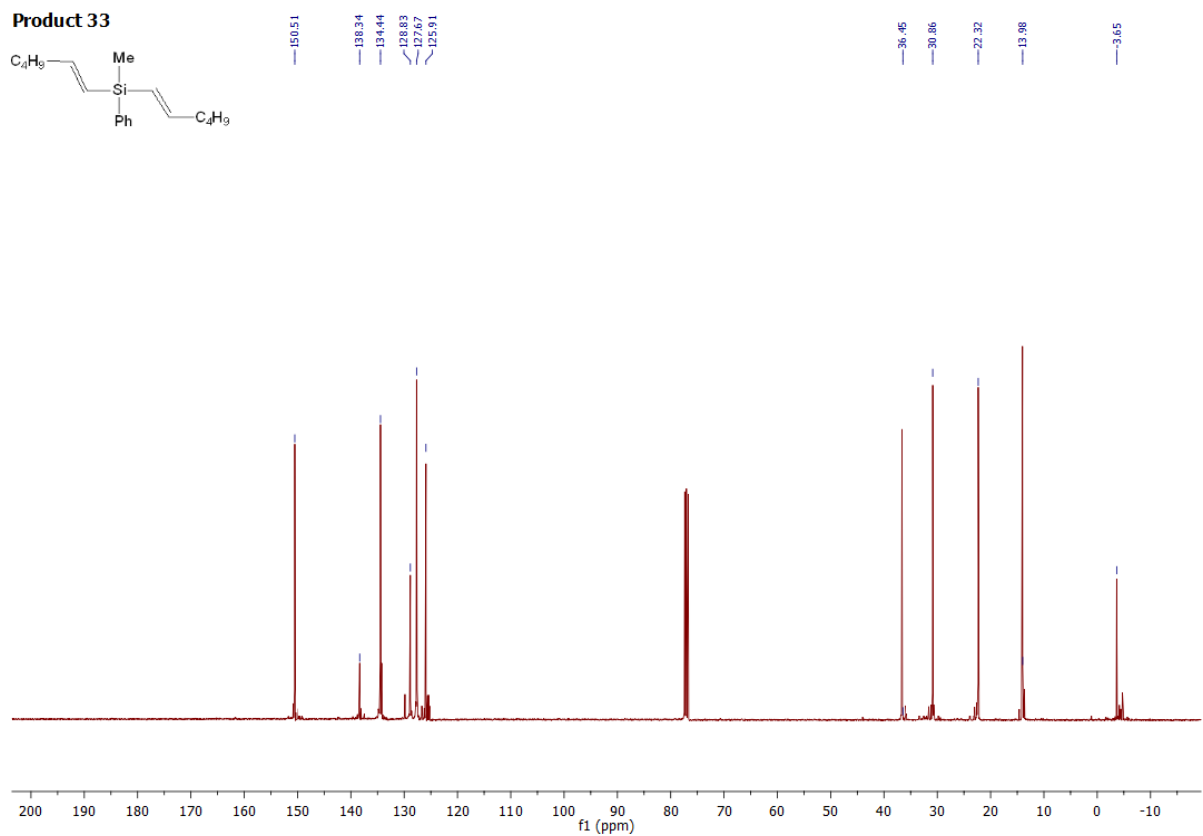

**Figure S92.** <sup>13</sup>C NMR (100 MHz, CDCl<sub>3</sub>) of product **33**

**Product 33**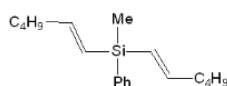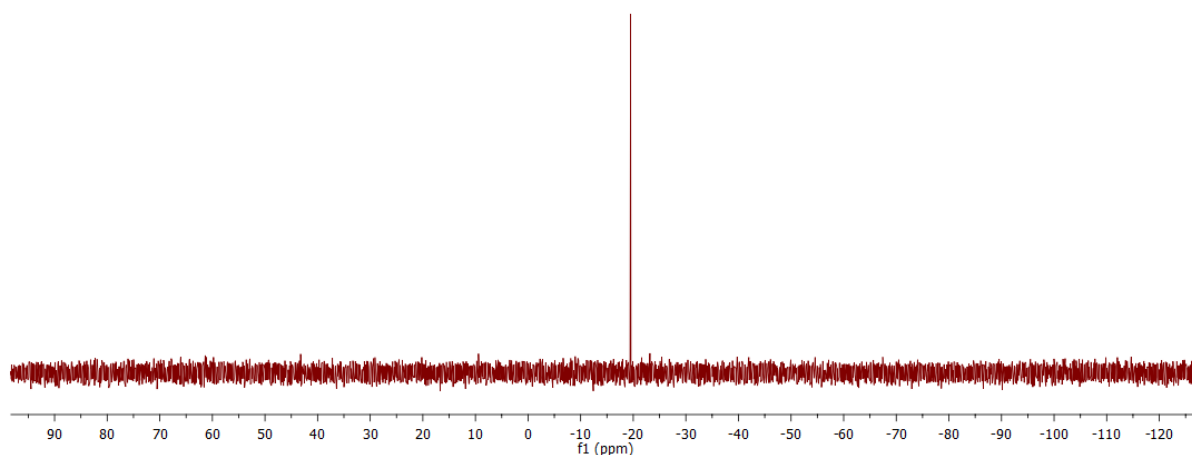**Figure S93.**  $^{29}\text{Si}$  NMR (79 MHz,  $\text{CDCl}_3$ ) of product **33***Analytical data of product 33:*

Isolated yield: 91% (286.5 mg);  $^1\text{H}$  NMR ( $\text{CDCl}_3$ ,  $\delta$ , ppm): 0.38 (s, 3H,  $\text{CH}_3$ ), 0.92 (t, 6H,  $J_{\text{HH}} = 7.2$  Hz,  $-(\text{CH}_2)_3\text{CH}_3$ ), 1.32 – 1.46 (m, 8H,  $-(\text{CH}_2)_2\text{CH}_3$ ), 2.11 – 2.24 (m, 4H,  $=\text{CHCH}_2$ ), 5.79 (dt, 2H,  $J_{\text{HH}} = 18.5, 1.5$  Hz,  $=\text{CHSi}$ ), 6.15 (dt, 2H,  $J_{\text{HH}} = 18.5, 6.1$  Hz,  $=\text{CHCH}_2$ ), 7.34 – 7.39 (m, 3H, Ph), 7.52 – 7.57 (m, 2H, Ph);  $^{13}\text{C}$  NMR ( $\text{CDCl}_3$ ,  $\delta$ , ppm): -3.65 ( $\text{CH}_3$ ), 13.98, 22.32, 30.86, 36.45, 125.91, 127.67, 128.83, 134.44, 138.34, 150.51;  $^{29}\text{Si}$  NMR ( $\text{CDCl}_3$ ,  $\delta$ , ppm): -19.50; MS:  $m/z$  (rel. intensity): 59 (13), 105 (20), 109 (13), 119 (20), 121 (78), 122 (25), 123 (16), 135 (13), 145 (30), 146 (16), 147 (13), 159 (27), 160 (16), 161 (14), 173 (36), 174 (27), 187 (22), 189 (27), 201 (21), 202 (36), 203 (83), 204 (18), 209 (100), 210 (21), 229 (47), 230 (13), 271 (79), 272 (19), 286 (6,  $\text{M}^+$ ); anal. calcd. for  $\text{C}_{19}\text{H}_{30}\text{Si}$  (%): C: 79.64, H: 10.55; found: C: 79.81, H: 10.72.

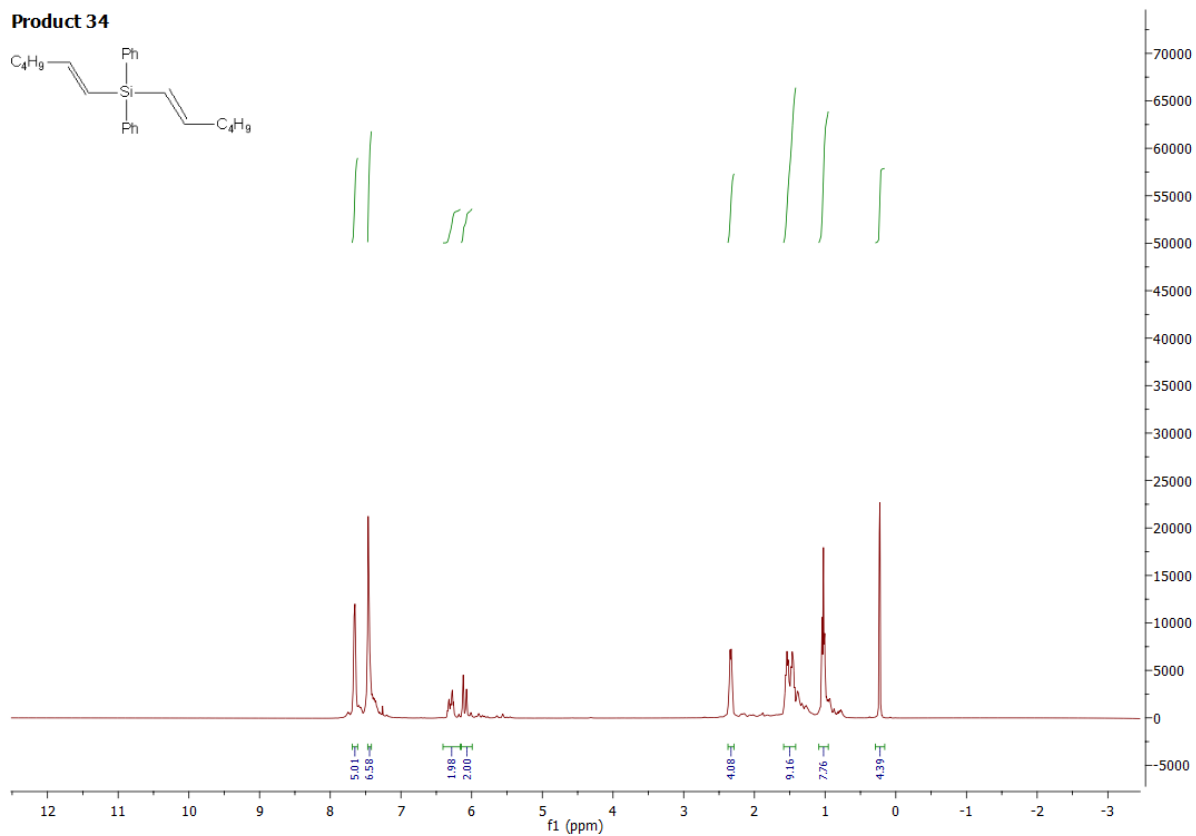

**Figure S94.**  $^1\text{H}$  NMR (400 MHz,  $\text{CDCl}_3$ ) of product **34**

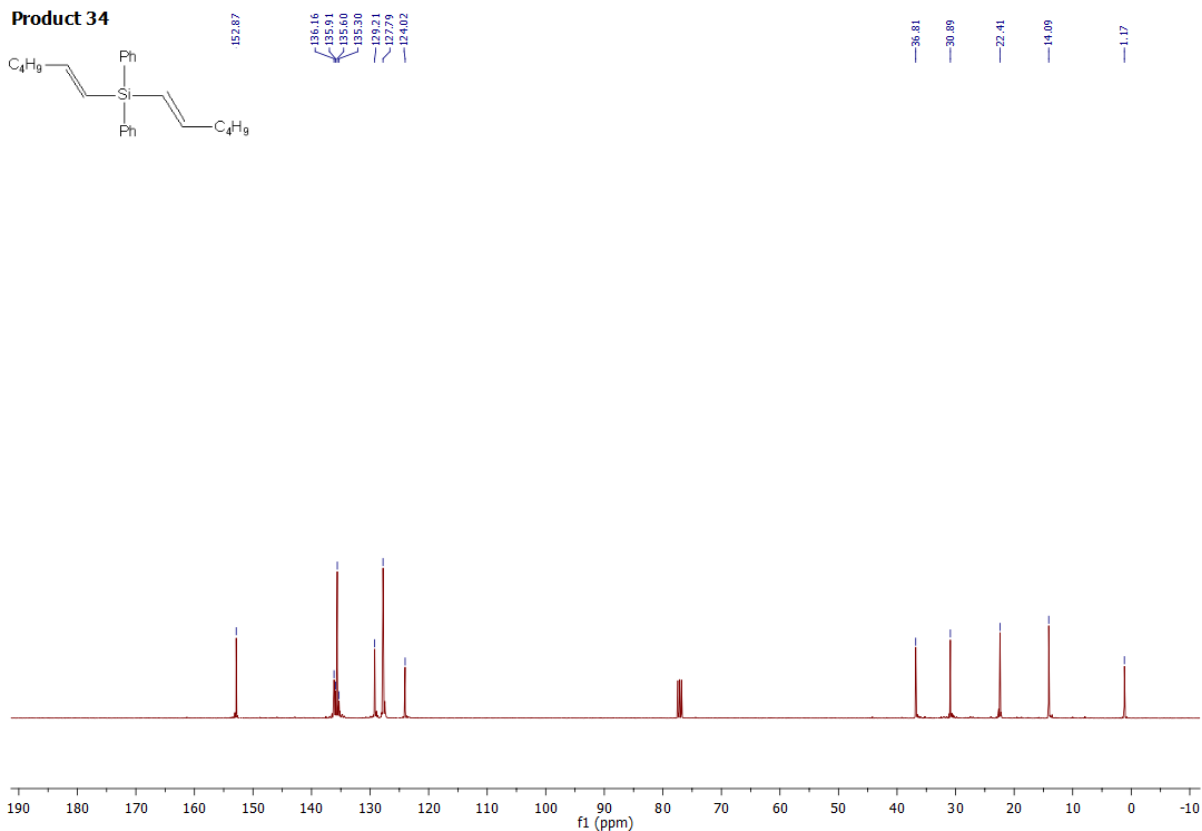

**Figure S95.**  $^{13}\text{C}$  NMR (100 MHz,  $\text{CDCl}_3$ ) of product **34**



**Product 34**

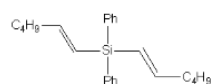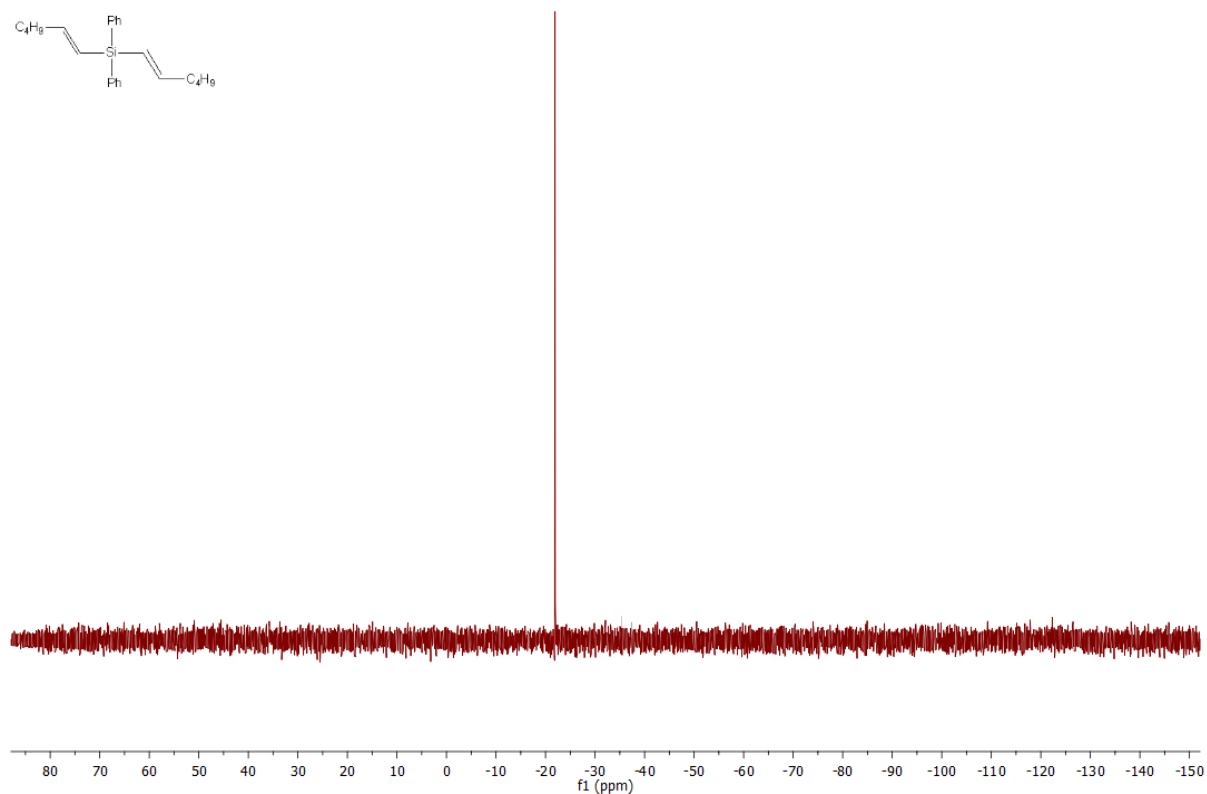

**Figure S96.**  $^{29}\text{Si}$  NMR (79 MHz,  $\text{CDCl}_3$ ) of product **34**

*Analytical data of product 34:*

Isolated yield: 90% (344.7 mg);  $^1\text{H}$  NMR ( $\text{CDCl}_3$ ,  $\delta$ , ppm): 1.02 – 1.07 (m, 6H,  $-(\text{CH}_2)_3\text{CH}_3$ ), 1.43 – 1.57 (m, 8H,  $-(\text{CH}_2)_2\text{CH}_3$ ), 2.32 – 2.40 (m, 4H,  $=\text{CHCH}_2$ ), 6.03–6.20 (m, 2H,  $=\text{CHSi}$ ), 6.21 – 6.40 (m, 2H,  $=\text{CHCH}_2$ ), 7.46– 7.50 (m, 6H, Ph), 7.66 – 7.70 (m, 4H, Ph);  $^{13}\text{C}$  NMR ( $\text{CDCl}_3$ ,  $\delta$ , ppm): 14.09, 22.41, 30.89, 36.81, 124.02, 127.79, 129.21, 135.30, 135.60, 135.91, 136.16, 152.87;  $^{29}\text{Si}$  NMR ( $\text{CDCl}_3$ ,  $\delta$ , ppm): -21.92; MS:  $m/z$  (rel. intensity): 105 (12), 183 (20), 266 (18), 271 (57), 272 (19), 291 (100), 292 (32), 348 (2,  $\text{M}^+$ ); anal. calcd. for  $\text{C}_{24}\text{H}_{32}\text{Si}$  (%): C: 82.69, H: 9.25; found: C: 82.81, H: 9.39.

**Product 35**

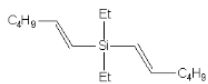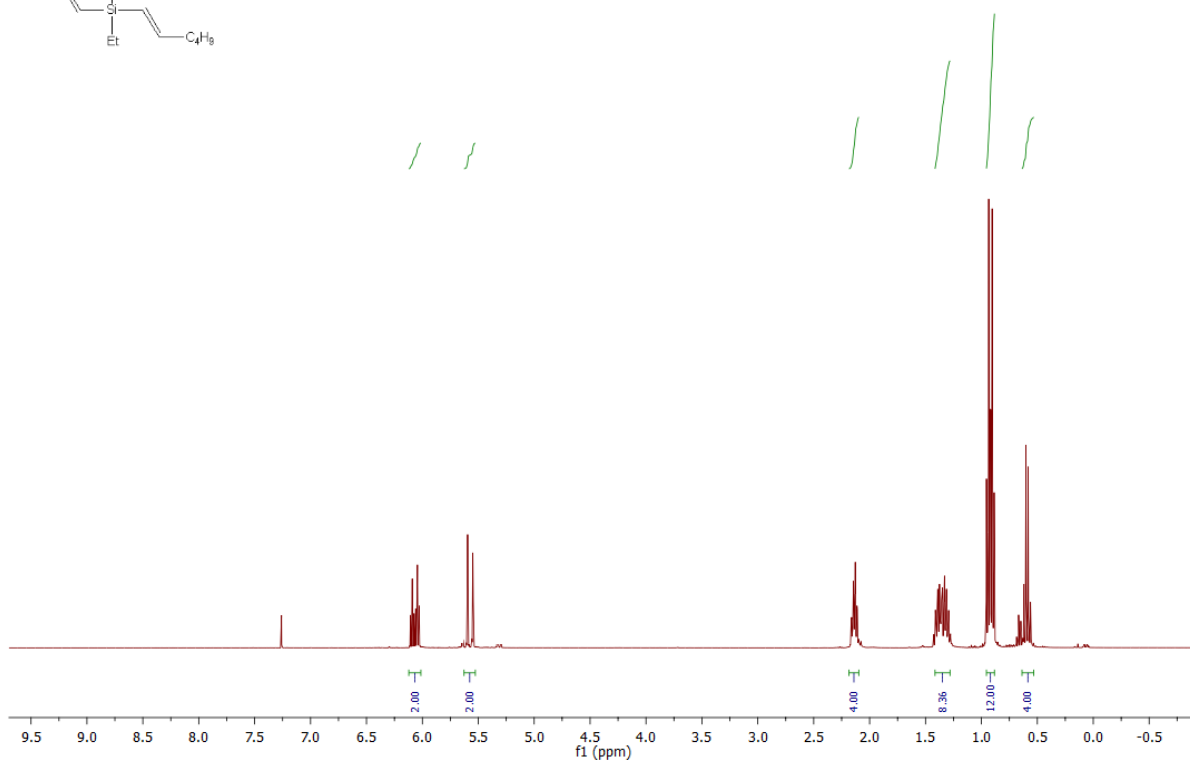

**Figure S97.** <sup>1</sup>H NMR (400 MHz, CDCl<sub>3</sub>) of product 35

**Product 35**

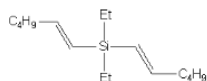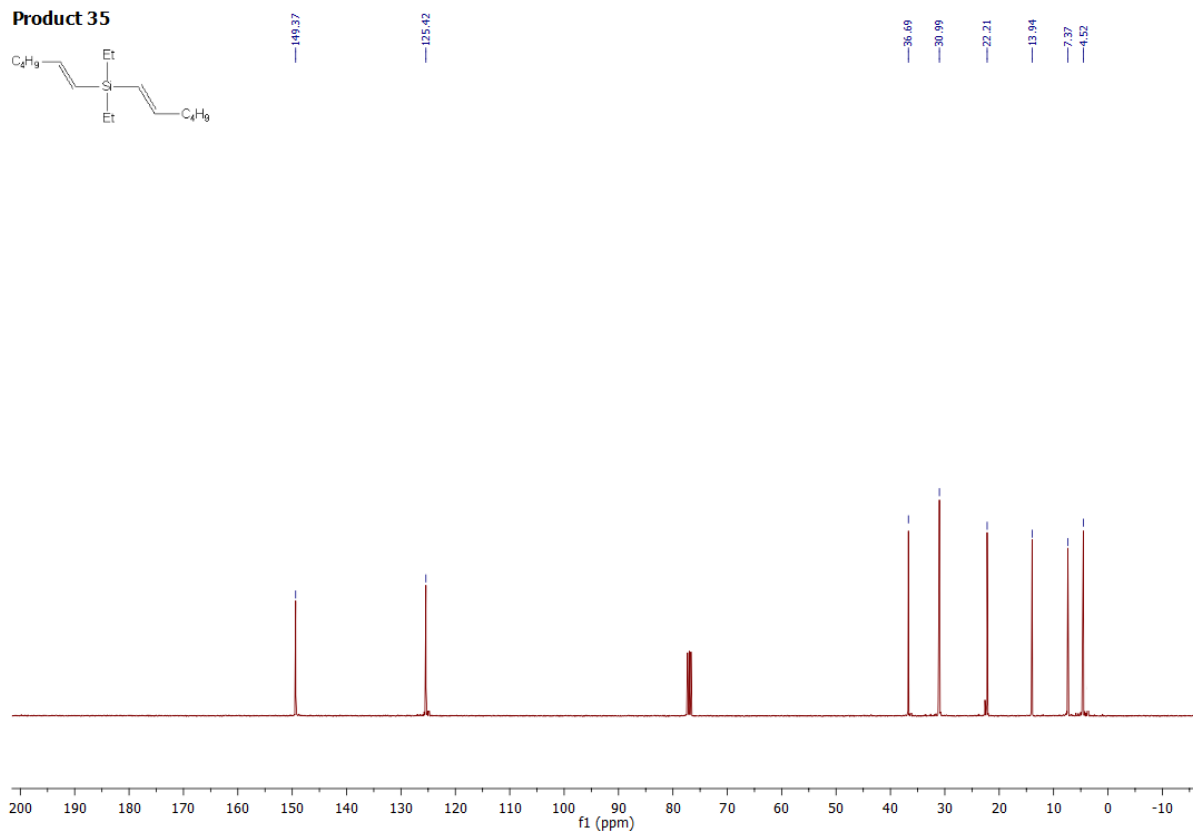

**Figure S98.** <sup>13</sup>C NMR (100 MHz, CDCl<sub>3</sub>) of product 35

**Product 35**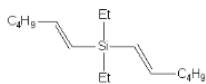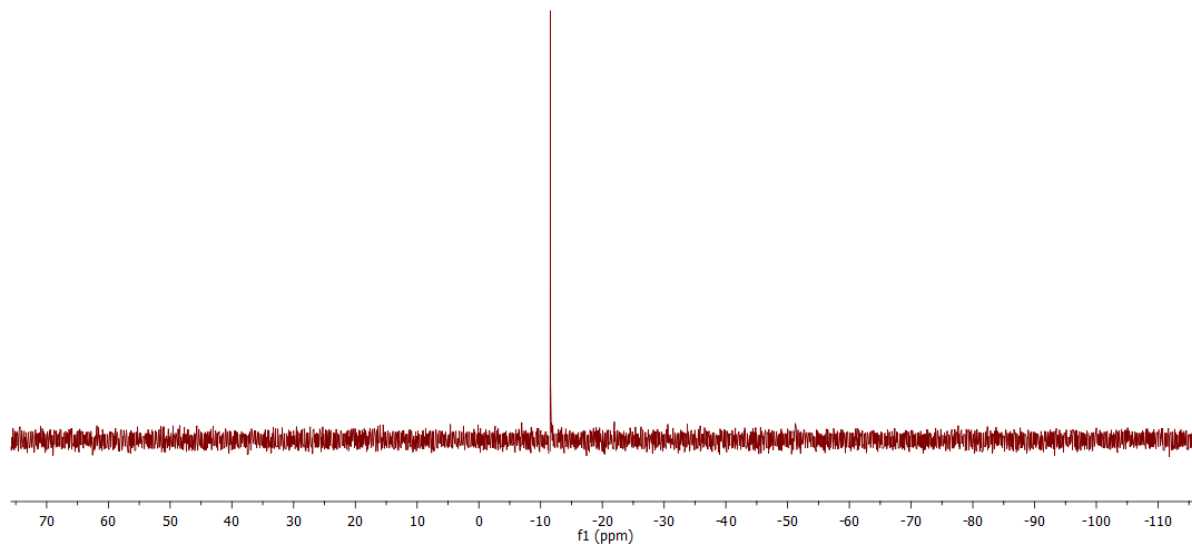

**Figure S99.**  $^{29}\text{Si}$  NMR (79 MHz,  $\text{CDCl}_3$ ) of product **35**

*Analytical data of product 35:*

Isolated yield: 89% (245 mg);  $^1\text{H}$  NMR ( $\text{CDCl}_3$ ,  $\delta$ , ppm): 0.59 (q, 4H,  $J_{\text{HH}} = 7.8$  Hz,  $\text{CH}_3\text{CH}_2-$ ), 0.90 (t, 6H,  $J_{\text{HH}} = 5.9$  Hz,  $-(\text{CH}_2)_3\text{CH}_3$ ), 0.94 (t, 6H,  $J_{\text{HH}} = 6.6$  Hz,  $\text{CH}_3\text{CH}_2-$ ), 1.28 – 1.42 (m, 8H,  $-(\text{CH}_2)_3\text{CH}_3$ ), 2.10 – 2.18 (m, 4H,  $-(\text{CH}_2)_3\text{CH}_3$ ), 5.57 (dt, 2H,  $J_{\text{HH}} = 18.6, 1.5$  Hz,  $=\text{CHSi}$ ), 6.07 (dt, 2H,  $J_{\text{HH}} = 18.6, 6.3$  Hz,  $=\text{CHCH}_2$ );  $^{13}\text{C}$  NMR ( $\text{CDCl}_3$ ,  $\delta$ , ppm): 4.52 ( $\text{CH}_3$ ), 7.37 ( $\text{CH}_2$ ), 13.94, 22.21, 30.99, 36.69, 125.42, 149.37;  $^{29}\text{Si}$  NMR ( $\text{CDCl}_3$ ,  $\delta$ , ppm): -11.58; MS:  $m/z$  (rel. intensity): 59 (11), 85 (14), 111 (15), 139 (11), 195 (32), 223 (100), 224 (19), 252 (1,  $\text{M}^+$ ); anal. calcd. for  $\text{C}_{16}\text{H}_{32}\text{Si}$  (%): C: 76.10, H: 12.77; found: C: 76.22, H: 12.82.

**Product 36**

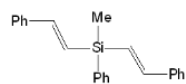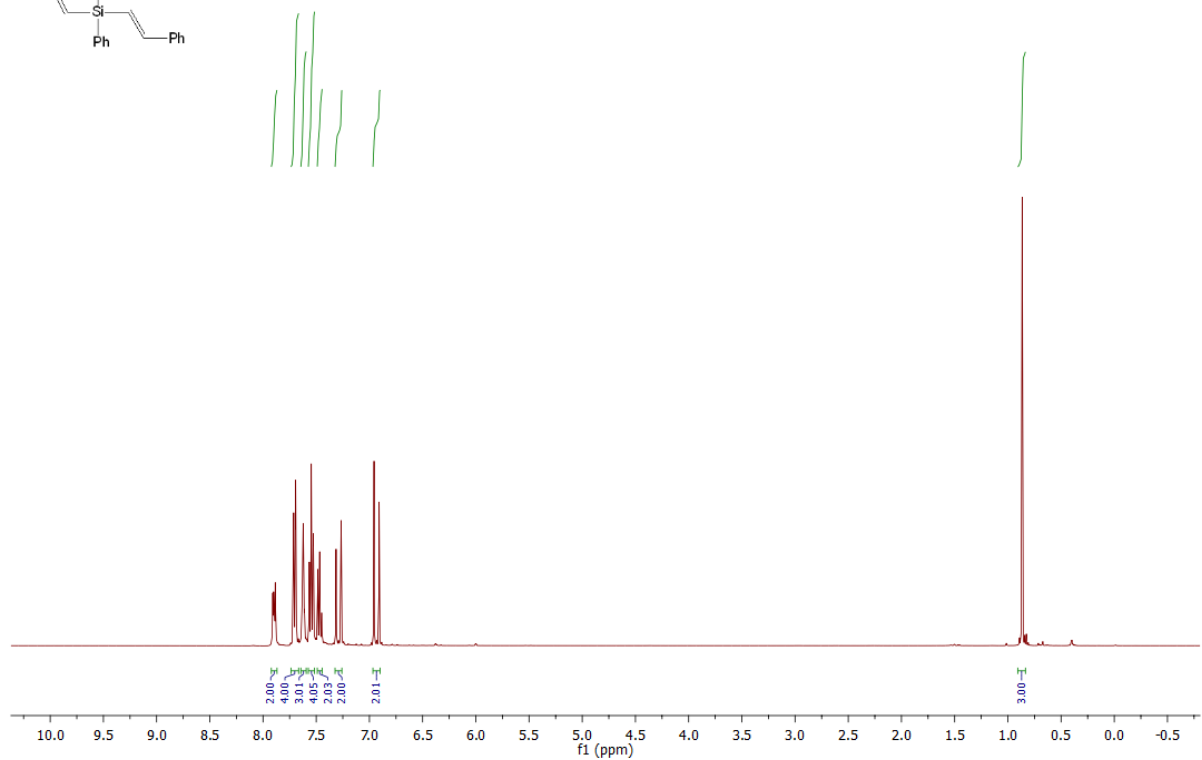

**Figure S100.**  $^1\text{H}$  NMR (400 MHz,  $\text{CDCl}_3$ ) of product **36**

**Product 36**

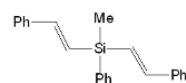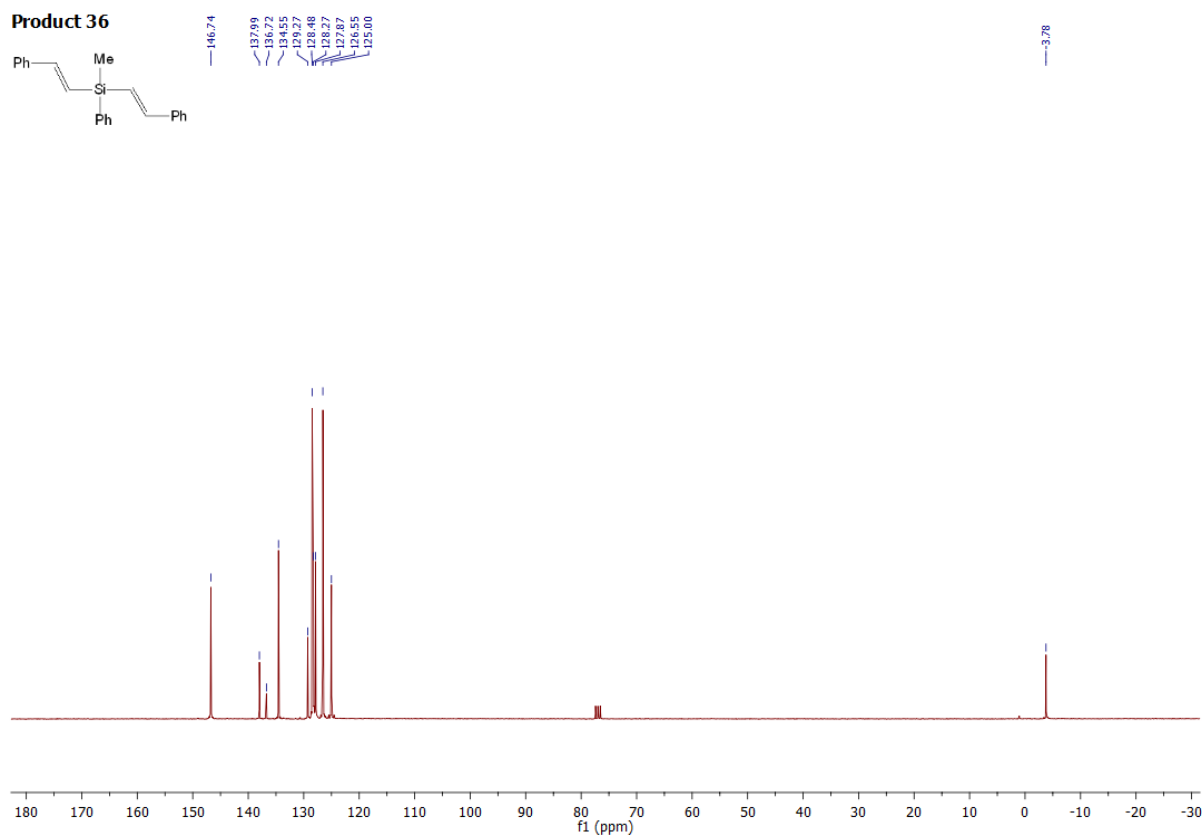

**Figure S101.**  $^{13}\text{C}$  NMR (100 MHz,  $\text{CDCl}_3$ ) of product **36**

**Product 36**

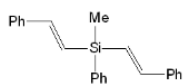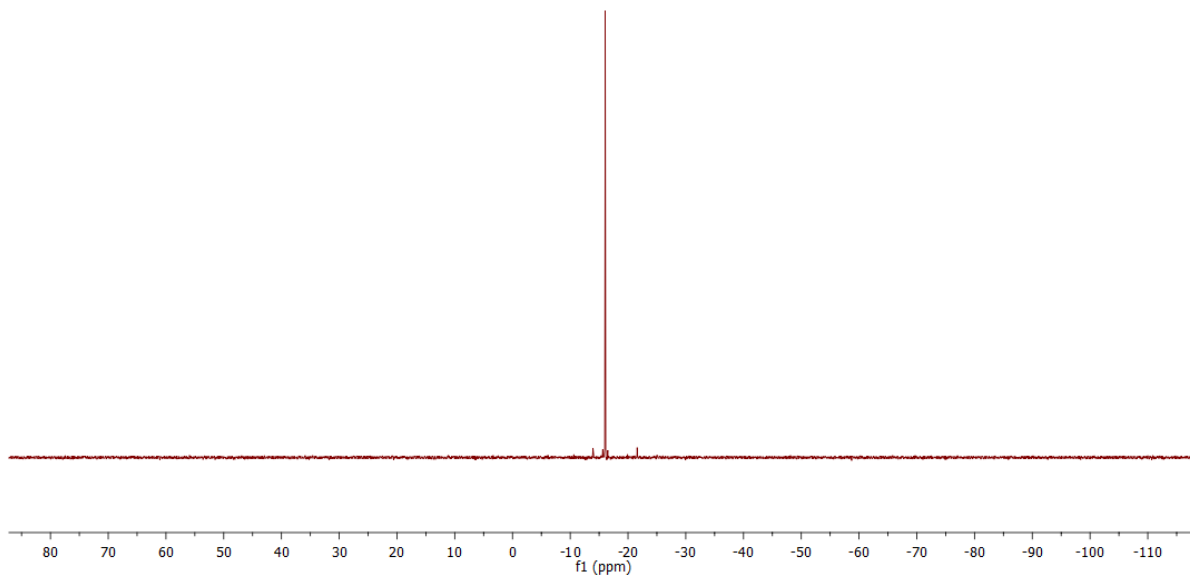

**Figure S102.**  $^{29}\text{Si}$  NMR (79 MHz,  $\text{CDCl}_3$ ) of product **36**

*Analytical data of product 36:*

Isolated yield: 90% (322.9 mg);  $^1\text{H}$  NMR ( $\text{CDCl}_3$ ,  $\delta$ , ppm): 0.86 (s, 3H,  $\text{CH}_3$ ), 6.93 (d, 2H,  $J_{\text{HH}} = 19.1$  Hz,  $=\text{CHSi}$ ), 7.29 (d, 2H,  $J_{\text{HH}} = 19.1$  Hz,  $=\text{CH}$ ), 7.44 – 7.49 (m, 2H, Ph), 7.52 – 7.57 (m, 4H, Ph), 7.59 – 7.64 (m, 3H, Ph), 7.67 – 7.74 (m, 4H, Ph), 7.87 – 7.92 (m, 2H, Ph);  $^{13}\text{C}$  NMR ( $\text{CDCl}_3$ ,  $\delta$ , ppm): -3.78 ( $\text{CH}_3$ ), 125.00, 126.55, 127.87, 128.27, 128.48, 129.27, 134.55, 136.72, 137.99, 146.74;  $^{29}\text{Si}$  NMR ( $\text{CDCl}_3$ ,  $\delta$ , ppm): -16.06; MS:  $m/z$  (rel. intensity): 51 (15), 102 (17), 103 (26), 105 (21), 121 (23), 145 (48), 146 (21), 218 (16), 219 (19), 220 (26), 222 (41), 223 (59), 224 (25), 233 (16), 245 (16), 246 (19), 247 (20), 248 (66), 249 (68), 250 (30), 311 (98), 312 (25), 325 (28), 326 (100,  $\text{M}^+$ ).

**Product 37**

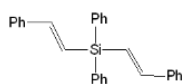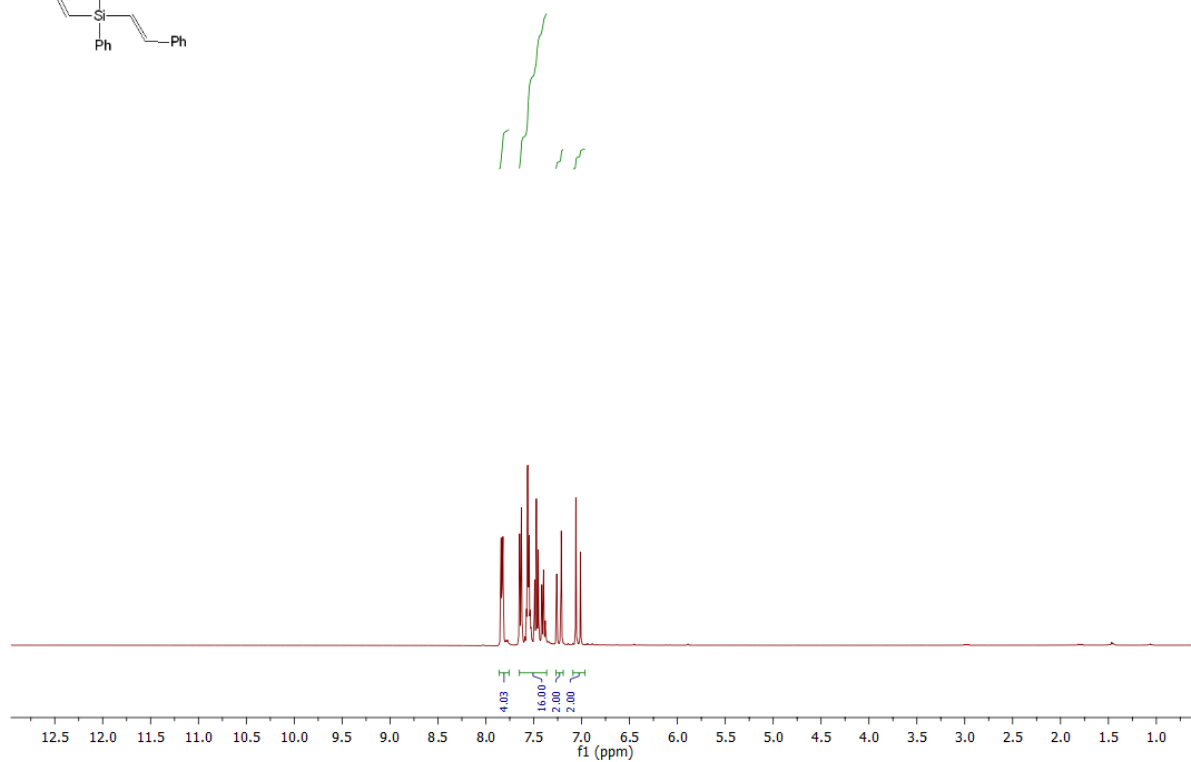

**Figure S103.** <sup>1</sup>H NMR (400 MHz, CDCl<sub>3</sub>) of product **37**

**Product 37**

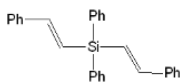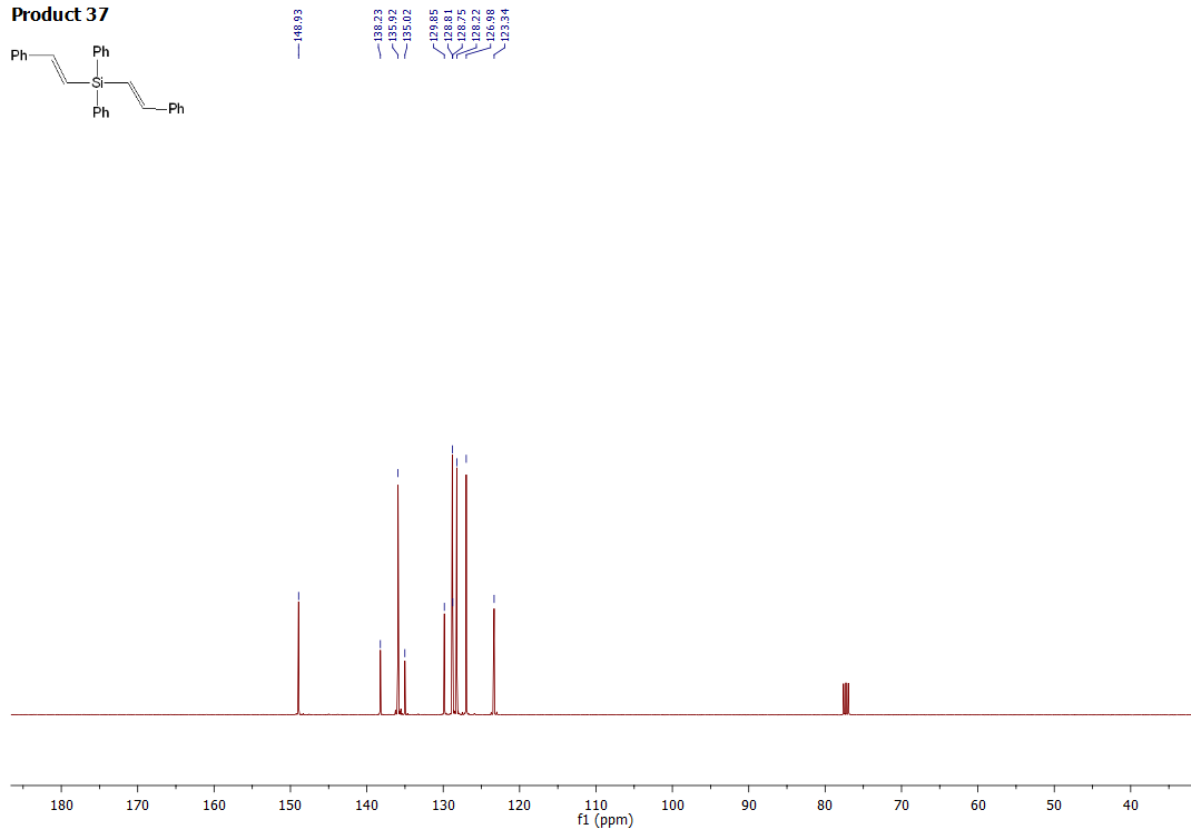

**Figure S104.** <sup>13</sup>C NMR (100 MHz, CDCl<sub>3</sub>) of product **37**

**Product 37**

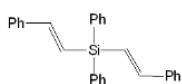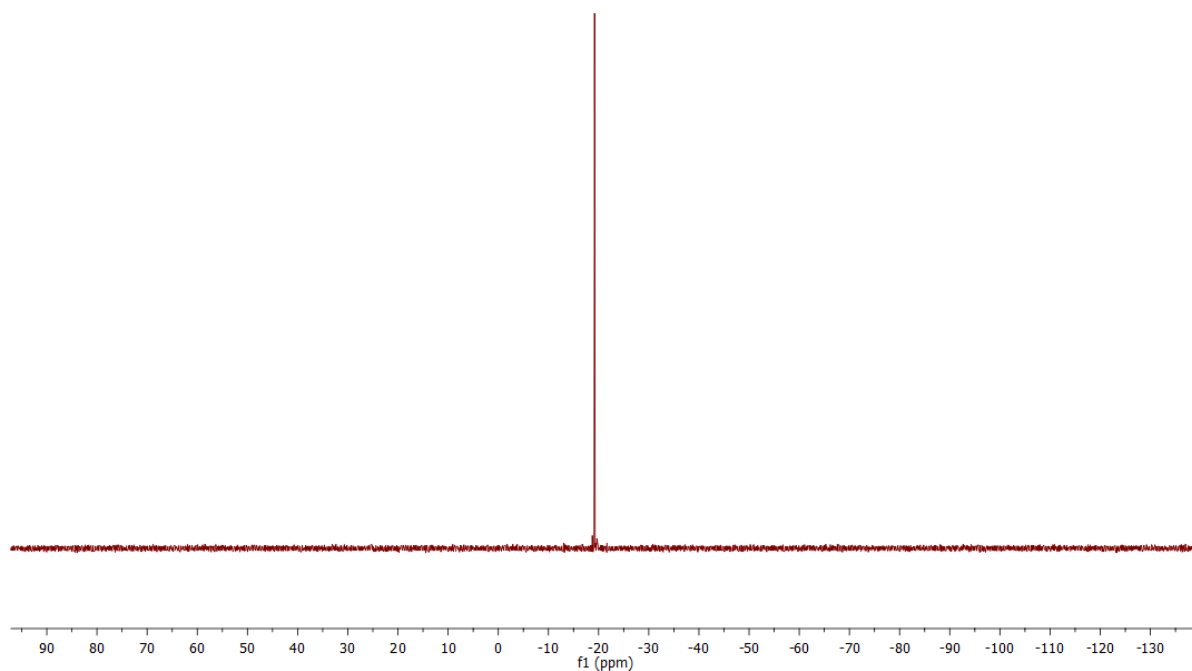

**Figure S105.** <sup>29</sup>Si NMR (79 MHz, CDCl<sub>3</sub>) of product **37**

*Analytical data of product 37:*

Isolated yield: 92% (392.8 mg); <sup>1</sup>H NMR (CDCl<sub>3</sub>, δ, ppm): 7.04 (d, 2H, *J*<sub>HH</sub> = 19.1 Hz, =CHSi), 7.04 (d, 2H, *J*<sub>HH</sub> = 19.1 Hz, =CH), 7.36 – 7.68 (m, 16H, Ph), 7.79 – 7.86 (m, 4H, Ph); <sup>13</sup>C NMR (CDCl<sub>3</sub>, δ, ppm): 123.34, 126.98, 128.22, 128.75, 128.81, 129.85, 135.02, 135.92, 138.23, 148.93; <sup>29</sup>Si NMR (CDCl<sub>3</sub>, δ, ppm): -19.19; MS: *m/z* (rel. intensity): 51 (13), 77 (13), 105 (37), 130 (36), 131 (13), 177 (13), 179 (16), 180 (33), 182 (14), 205 (41), 206 (39), 218 (15), 219 (45), 281 (14), 295 (100), 296 (29), 308 (44), 309 (21), 388 (4, M<sup>+</sup>).

**Product 38**

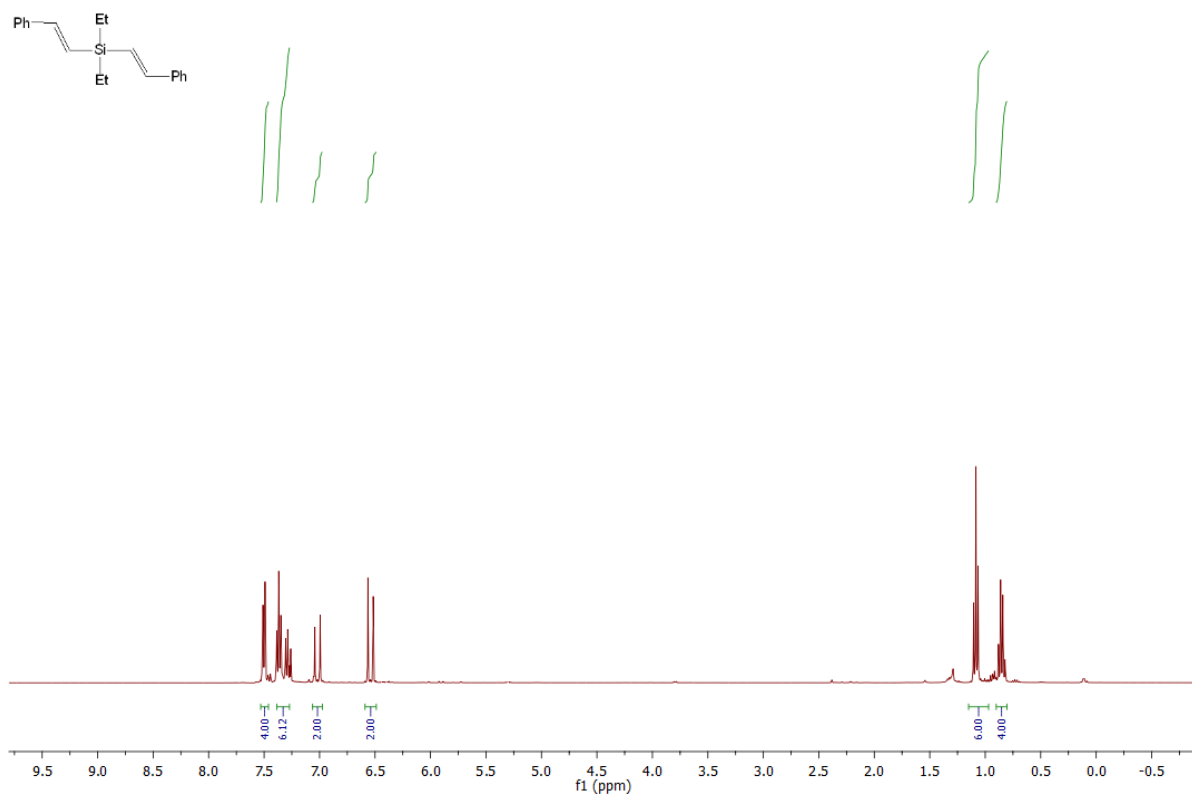

**Figure S106.** <sup>1</sup>H NMR (400 MHz, CDCl<sub>3</sub>) of product **38**

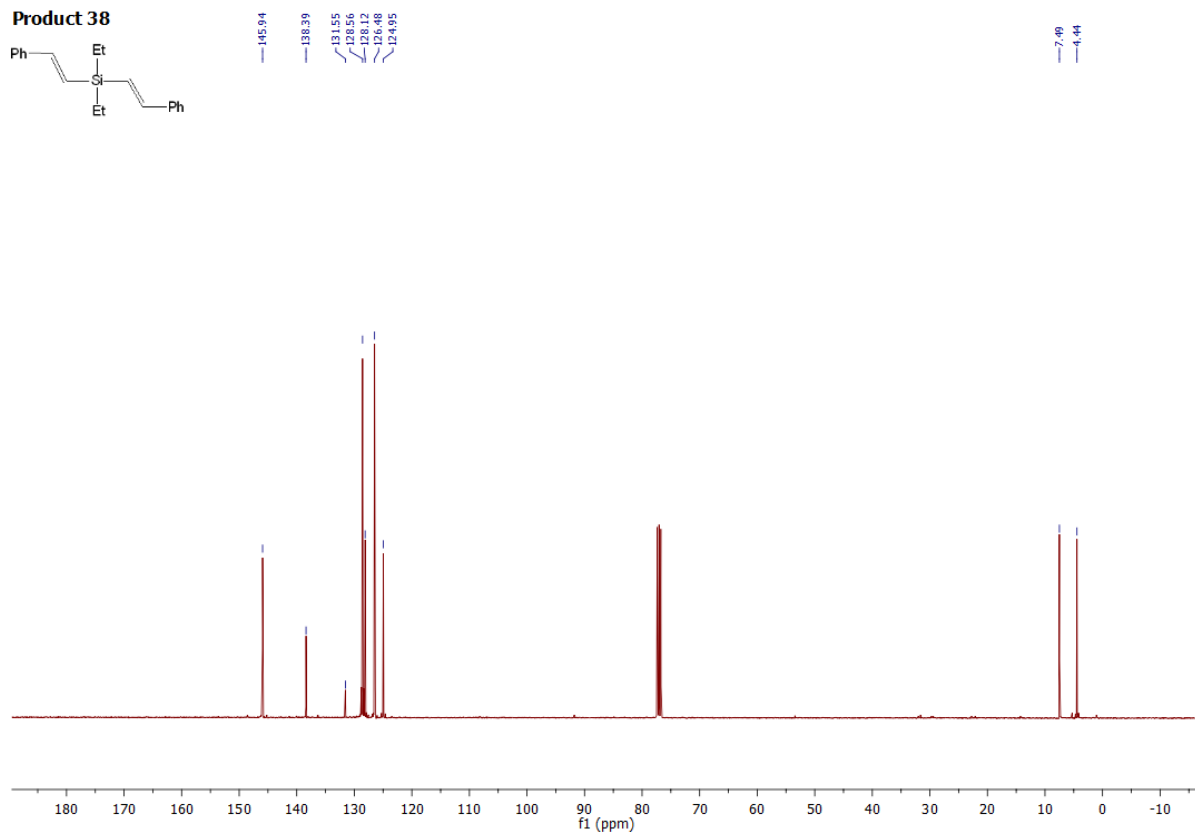

**Figure S107.** <sup>13</sup>C NMR (100 MHz, CDCl<sub>3</sub>) of product **38**



**Product 38**

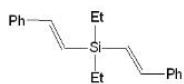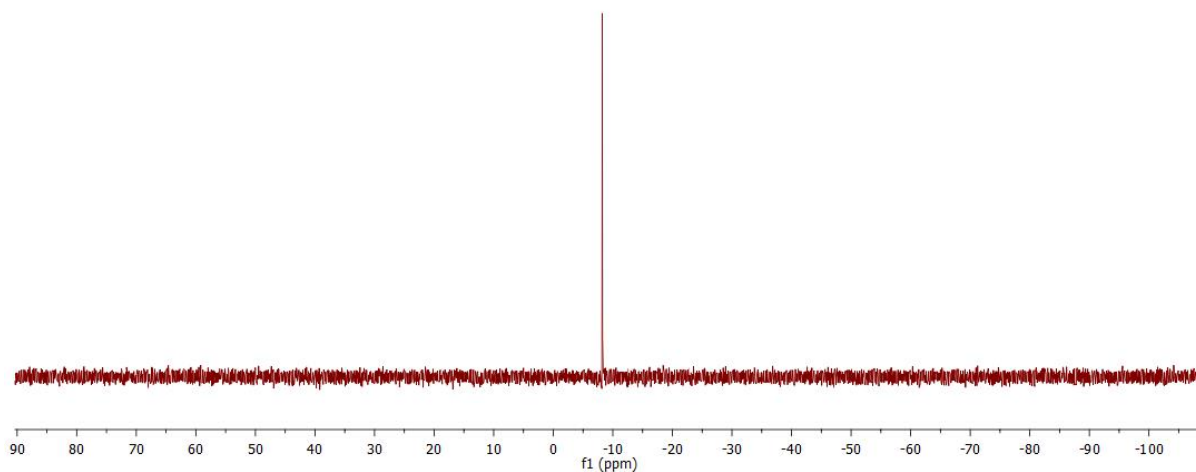

**Figure S108.**  $^{29}\text{Si}$  NMR (79 MHz,  $\text{CDCl}_3$ ) of product **38**

*Analytical data of product 38:*

Isolated yield: 92% (295.7 mg);  $^1\text{H}$  NMR ( $\text{CDCl}_3$ ,  $\delta$ , ppm): 0.80-0.90 (m, 4H,  $\text{CH}_3\text{CH}_2^-$ ), 1.04-1.12 (m, 6H,  $\text{CH}_3\text{CH}_2$ ), 6.54 (d, 2H,  $J_{\text{HH}} = 19.2$  Hz,  $=\text{CHSi}$ ), 7.02 (d, 2H,  $J_{\text{HH}} = 19.2$  Hz,  $=\text{CH}$ ), 7.26 – 7.40 (m, 6H, Ph), 7.47 – 7.52 (m, 4H, Ph);  $^{13}\text{C}$  NMR ( $\text{CDCl}_3$ ,  $\delta$ , ppm): 4.44 ( $\text{CH}_3$ ), 7.49 ( $\text{CH}_2$ ), 124.95, 126.48, 128.12, 128.56, 131.55, 138.39, 145.94;  $^{29}\text{Si}$  NMR ( $\text{CDCl}_3$ ,  $\delta$ , ppm): -8.24; MS:  $m/z$  (rel. intensity): 103 (10), 105 (14), 131 (27), 159 (17), 189 (12), 235 (19), 263 (100), 264 (24), 292 (28,  $\text{M}^+$ ); anal. calcd. for  $\text{C}_{20}\text{H}_{24}\text{Si}$  (%): C: 82.13, H: 8.27; found: C: 82.35, H: 8.42.

**Product 39**

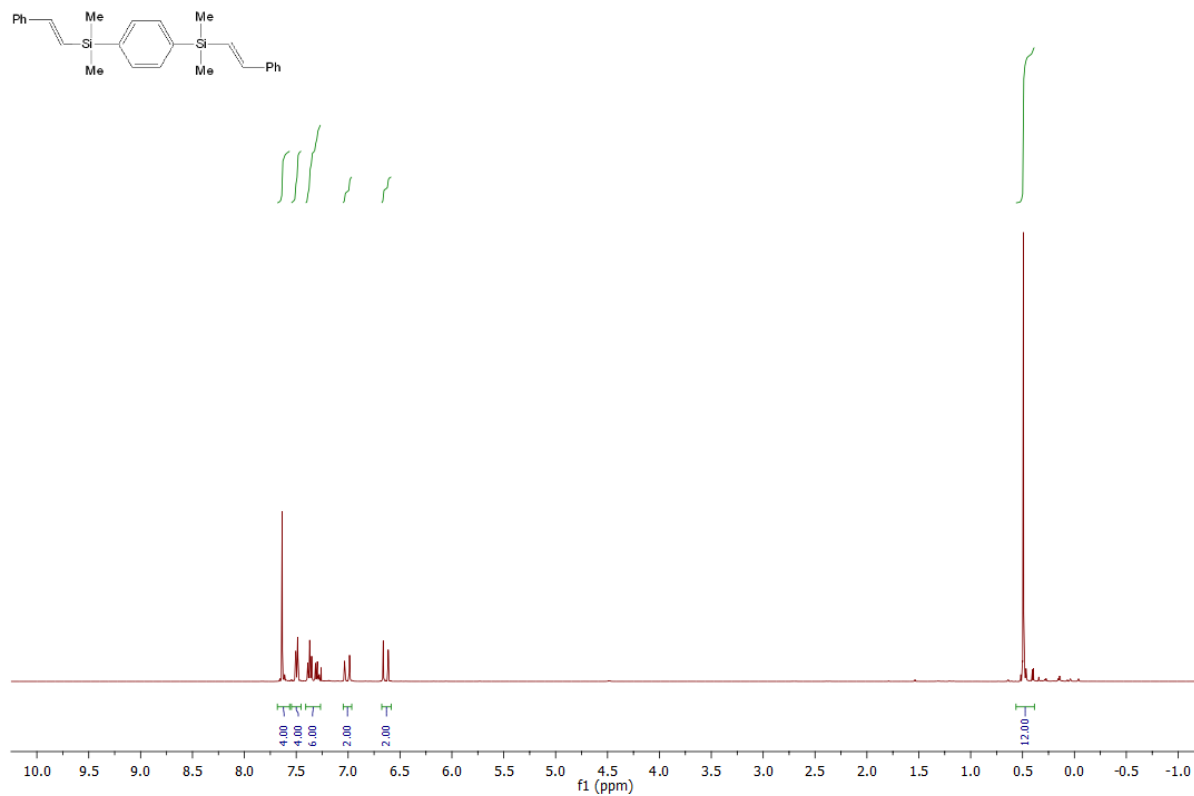

**Figure S109.** <sup>1</sup>H NMR (400 MHz, CDCl<sub>3</sub>) of product **39**

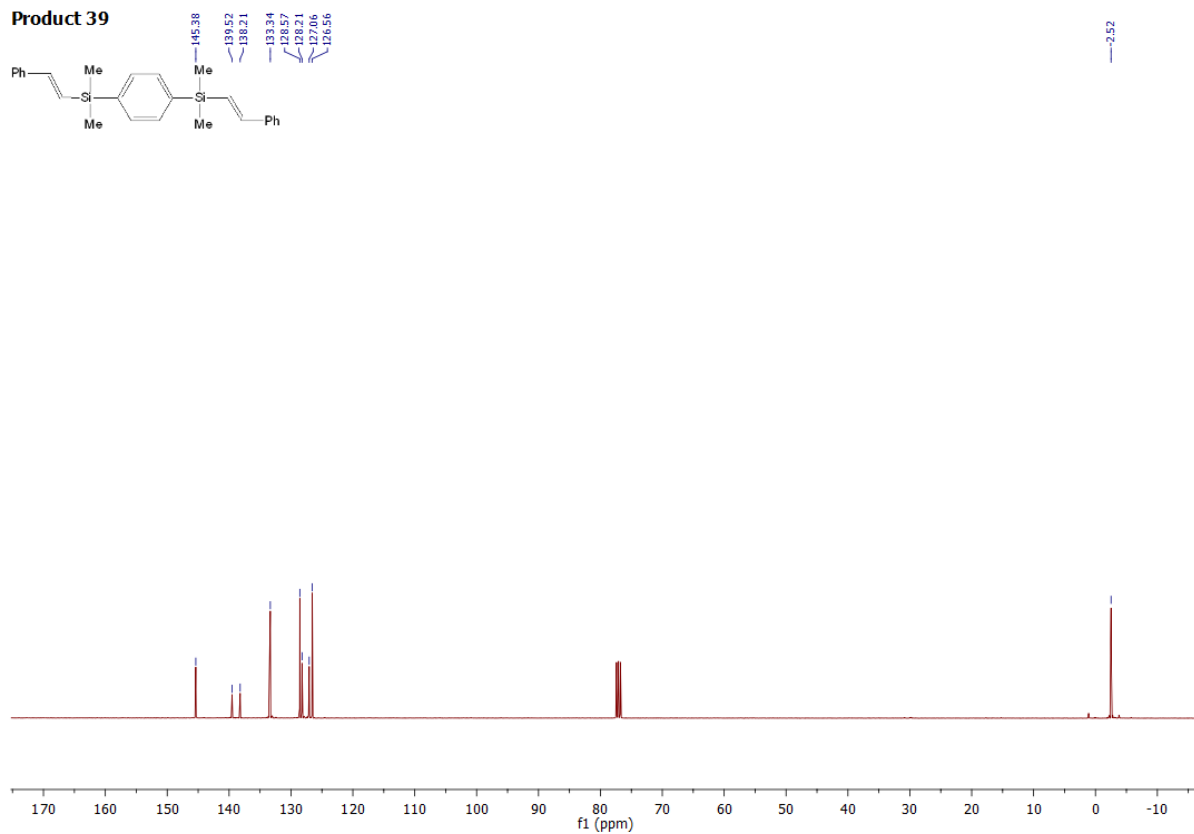

**Figure S110.** <sup>13</sup>C NMR (100 MHz, CDCl<sub>3</sub>) of product **39**

**Product 39**

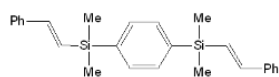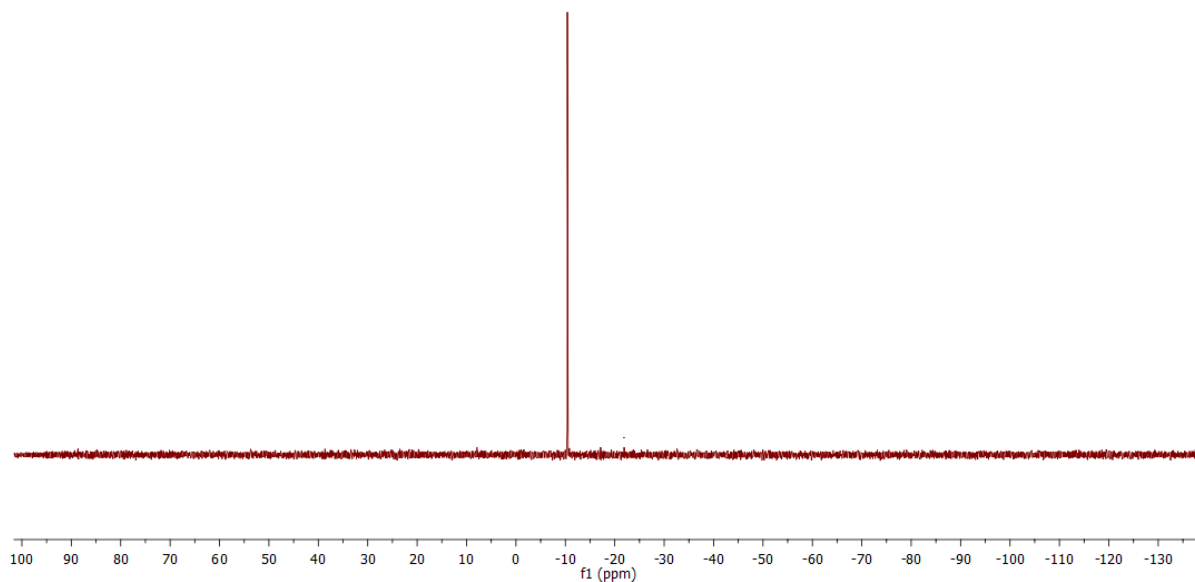

**Figure S111.**  $^{29}\text{Si}$  NMR (79 MHz,  $\text{CDCl}_3$ ) of product **39**

*Analytical data of product 39:*

Isolated yield: 92% (403 mg);  $^1\text{H}$  NMR ( $\text{CDCl}_3$ ,  $\delta$ , ppm): 0.49 (overlapping s, 12H,  $\text{CH}_3$ ), 6.64 (d, 2H,  $J_{\text{HH}} = 19.1$  Hz,  $=\text{CHSi}$ ), 7.01 (d, 2H,  $J_{\text{HH}} = 19.1$  Hz,  $=\text{CH}$ ), 7.27 – 7.41 (m, 6H, Ph), 7.45 – 7.55 (m, 4H, Ph), 7.57 – 7.68 (m, 4H, Ph);  $^{13}\text{C}$  NMR ( $\text{CDCl}_3$ ,  $\delta$ , ppm): -2.52 ( $\text{CH}_3$ ), 126.56, 127.06, 128.21, 128.57, 133.34, 138.21, 139.52, 145.38;  $^{29}\text{Si}$  NMR ( $\text{CDCl}_3$ ,  $\delta$ , ppm): -10.47; MS:  $m/z$  (rel. intensity): 135 (20), 145 (19), 161 (17), 237 (15), 294 (17), 296 (40), 297 (18), 340 (23), 383 (31), 398 (100,  $\text{M}^+$ ).

### 1.3. NMR spectra and analytical data of unsymmetrical *E,E*-divinylsilanes

Product 40

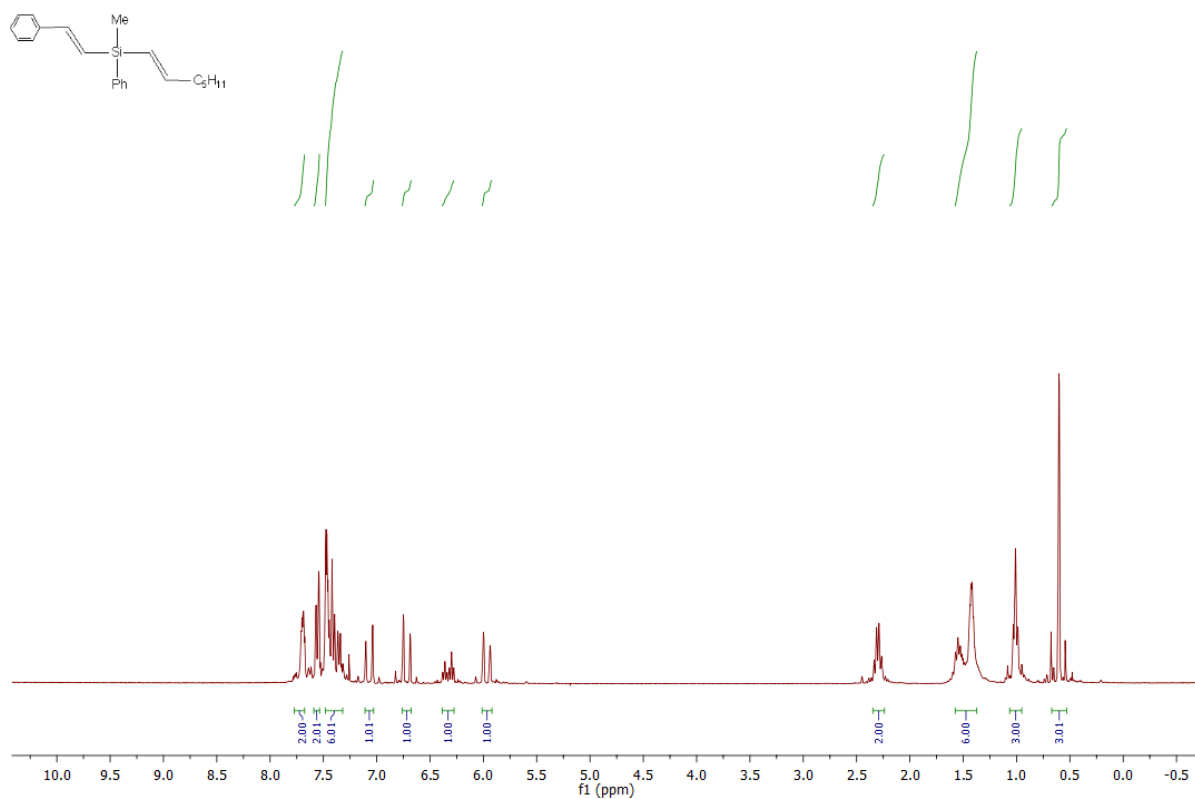

Figure S112. <sup>1</sup>H NMR (400 MHz, CDCl<sub>3</sub>) of product 40

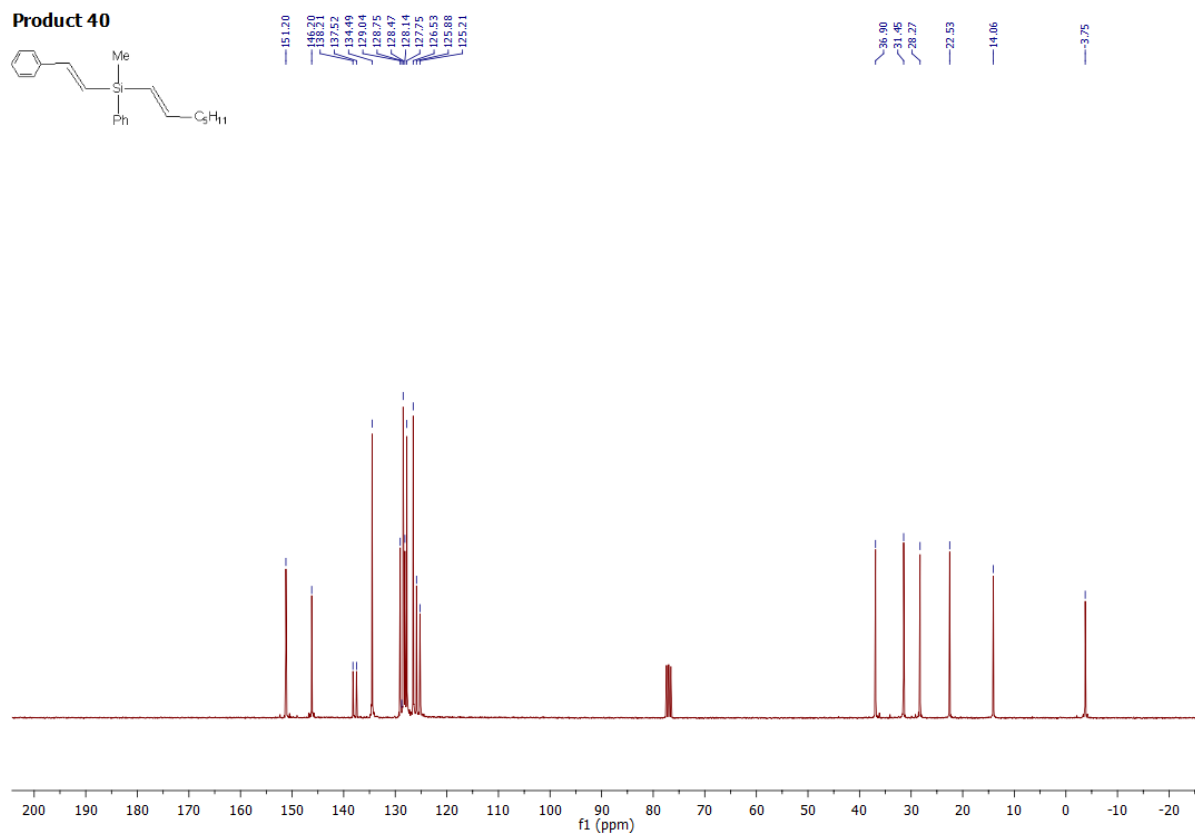

Figure S113. <sup>13</sup>C NMR (100 MHz, CDCl<sub>3</sub>) of product 40

**Product 40**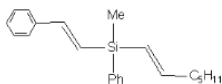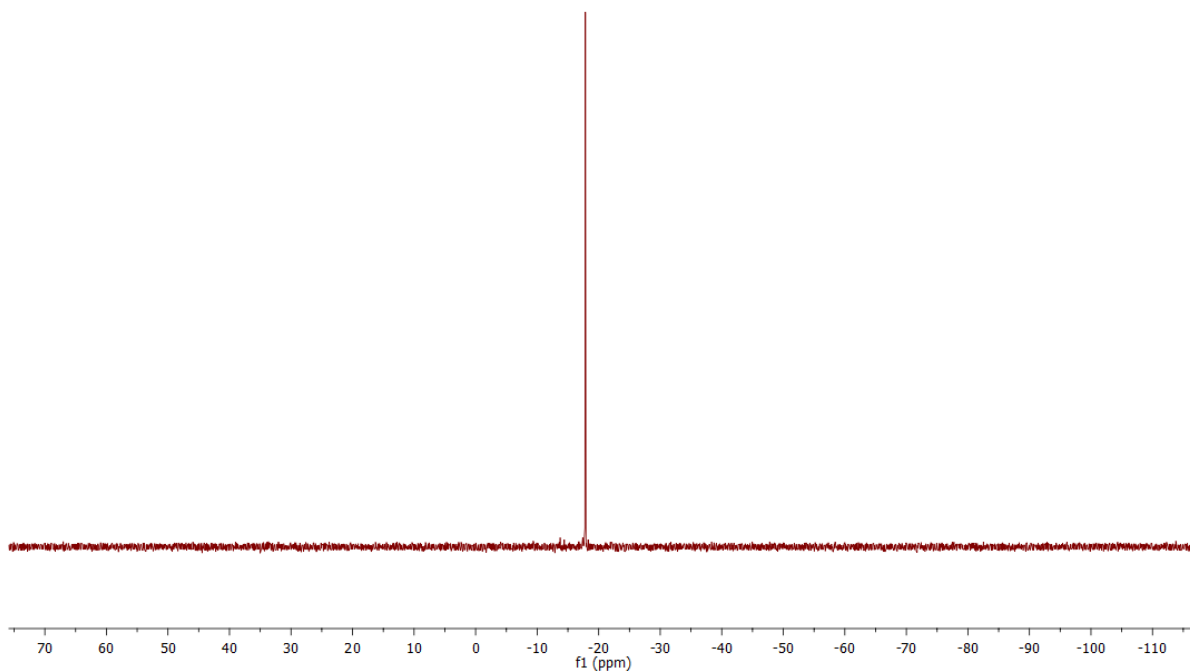**Figure S114.**  $^{29}\text{Si}$  NMR (79 MHz,  $\text{CDCl}_3$ ) of product **40***Analytical data of product 40:*

Isolated yield: 90% (317 mg);  $^1\text{H}$  NMR ( $\text{CDCl}_3$ ,  $\delta$ , ppm): 0.60 (s, 3H,  $\text{CH}_3$ ), 1.01 (t, 3H,  $J_{\text{HH}} = 6.4$  Hz,  $-(\text{CH}_2)_4\text{CH}_3$ ), 1.37 – 1.88 (m, 6H,  $-(\text{CH}_2)_4\text{CH}_3$ ), 2.24 – 2.35 (m, 2H,  $=\text{CHCH}_2$ ), 5.97 (d, 1H,  $J_{\text{HH}} = 18.5$  Hz,  $=\text{CHSi}$ ), 6.33 (dt, 1H,  $J_{\text{HH}} = 18.5$ , 6.2 Hz,  $=\text{CHCH}_2$ ), 6.72 (d, 1H,  $J_{\text{HH}} = 19.1$  Hz,  $=\text{CHSi}$ ), 7.07 (d, 1H,  $J_{\text{HH}} = 19.1$  Hz,  $=\text{CHCH}_2$ ), 7.34 – 7.48 (m, 6H, Ph), 7.52 – 7.59 (m, 2H, Ph), 7.66 – 7.73 (m, 2H, Ph);  $^{13}\text{C}$  NMR ( $\text{CDCl}_3$ ,  $\delta$ , ppm): -3.75 ( $\text{CH}_3$ ), 14.06, 22.53, 28.27, 31.45, 36.90, 125.21, 125.88, 126.53, 127.75, 128.14, 128.47, 128.75, 129.04, 134.49, 137.52, 138.21, 146.20, 151.20;  $^{29}\text{Si}$  NMR ( $\text{CDCl}_3$ ,  $\delta$ , ppm): -17.84; MS:  $m/z$  (rel. intensity): 105 (23), 121 (42), 131 (18), 145 (38), 146 (16), 158 (20), 159 (21), 216 (15), 217 (31), 221 (16), 222 (19), 223 (21), 242 (29), 243 (100), 244 (48), 245 (18), 249 (23), 250 (48), 305 (69), 306 (18), 320 (39,  $\text{M}^+$ ); anal. calcd. for  $\text{C}_{22}\text{H}_{28}\text{Si}$  (%): C: 82.43, H: 8.80; found: C: 82.52, H: 8.88.

**Product 41**

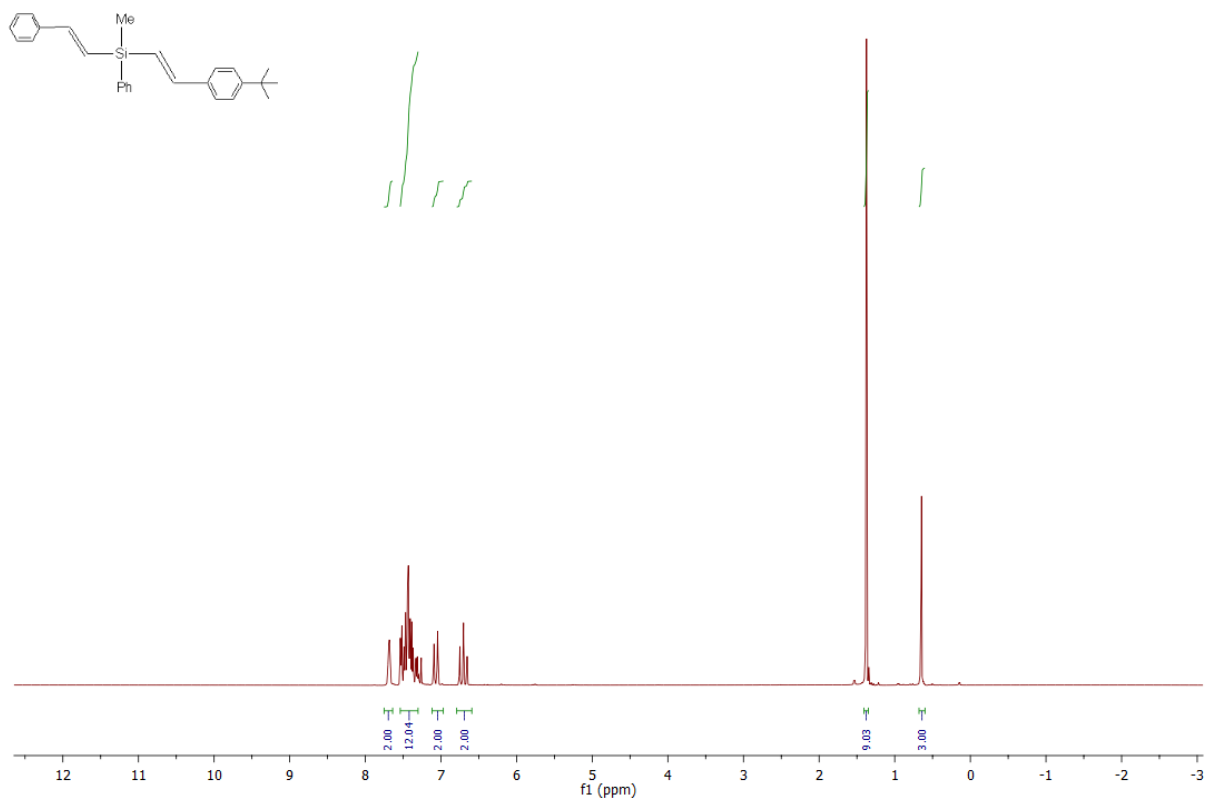

**Figure S115.** <sup>1</sup>H NMR (400 MHz, CDCl<sub>3</sub>) of product **41**

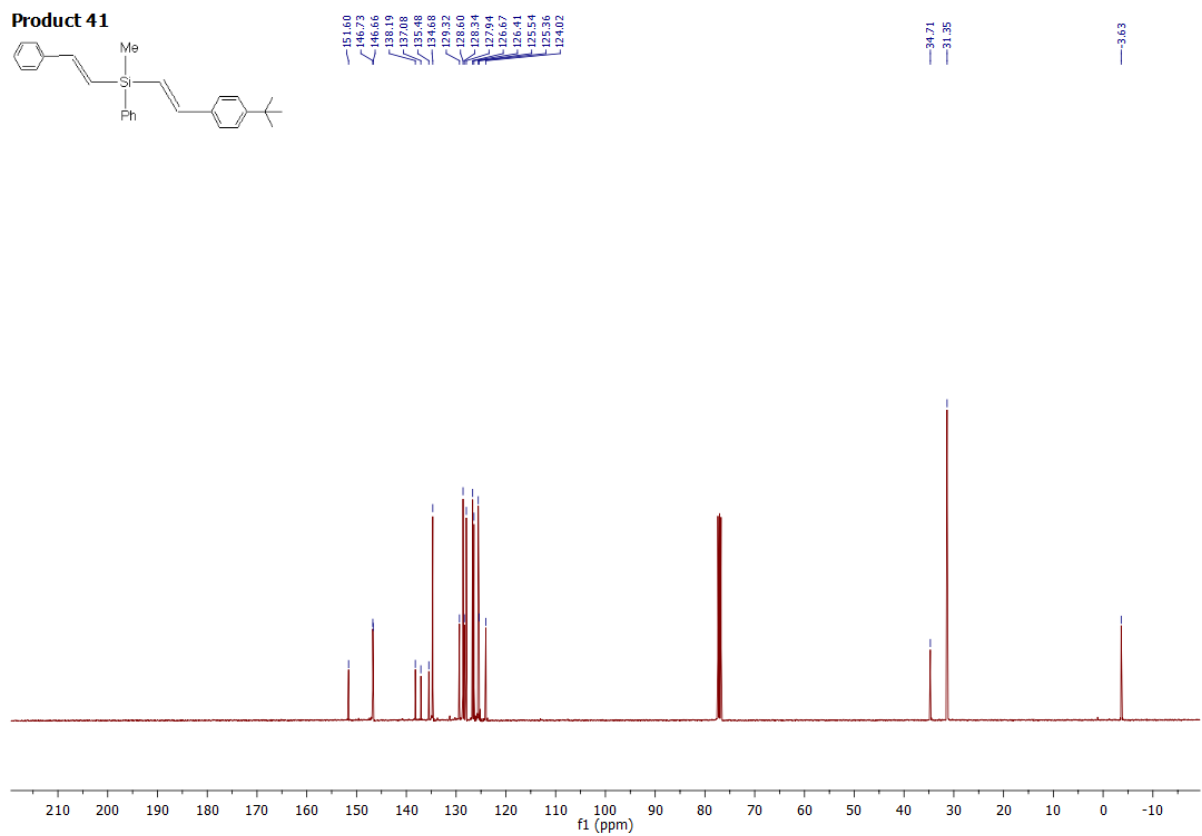

**Figure S116.** <sup>13</sup>C NMR (100 MHz, CDCl<sub>3</sub>) of product **41**

**Product 41**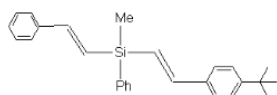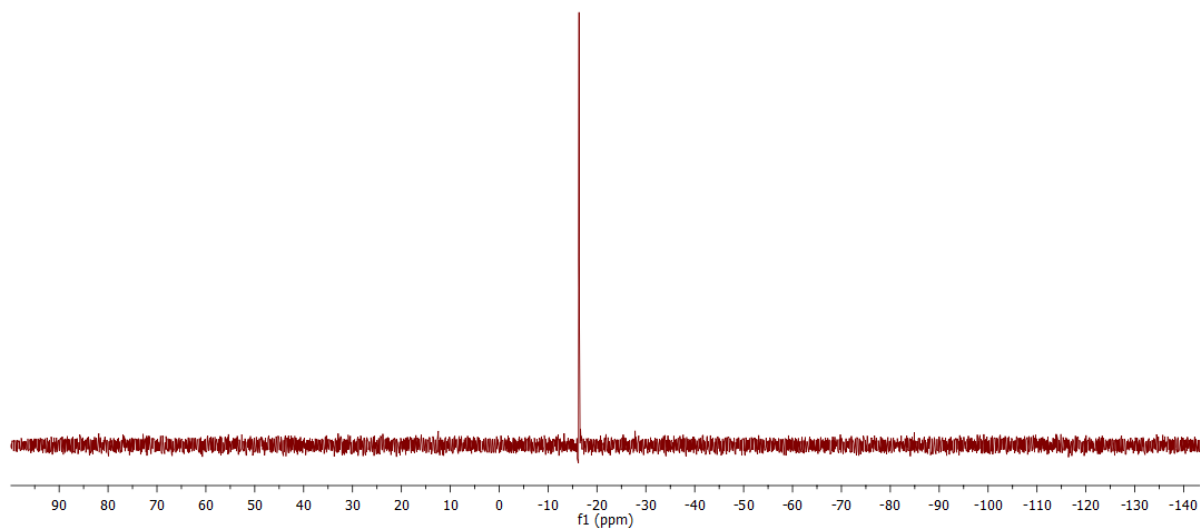**Figure S117.**  $^{29}\text{Si}$  NMR (79 MHz,  $\text{CDCl}_3$ ) of product **41***Analytical data of product 41:*

Isolated yield: 90% (378.4 mg);  $^1\text{H}$  NMR ( $\text{CDCl}_3$ ,  $\delta$ , ppm): 0.65 (s, 3H,  $\text{CH}_3$ ), 1.37 (s, 9H,  $\text{C}(\text{CH}_3)_3$ ), 6.70 (dt, 2H,  $J_{\text{HH}} = 19.3, 1.6$  Hz,  $=\text{CHCH}_2$ ), 7.07 (d, 2H,  $J_{\text{HH}} = 19.1$  Hz,  $=\text{CHSi}$ ), 7.30 – 7.54 (m, 12H, Ph and  $-\text{C}_6\text{H}_4-$ ), 7.64 – 7.75 (m, 2H, Ph);  $^{13}\text{C}$  NMR ( $\text{CDCl}_3$ ,  $\delta$ , ppm): -3.63 ( $\text{CH}_3$ ), 31.35 ( $\text{C}(\text{CH}_3)_3$ ), 34.71 ( $\text{C}(\text{CH}_3)_3$ ), 124.02, 125.36, 125.54, 126.41, 126.67, 127.94, 128.34, 128.60, 129.32, 134.68, 135.48, 137.08, 138.19, 146.70 (d,  $J = 6.9$  Hz), 151.60;  $^{29}\text{Si}$  NMR ( $\text{CDCl}_3$ ,  $\delta$ , ppm): -16.32; MS:  $m/z$  (rel. intensity): 57 (50), 187 (30), 222 (21), 243 (25), 244 (29), 245 (26), 246 (31), 247 (37), 248 (34), 249 (30), 250 (33), 254 (20), 262 (22), 264 (47), 265 (30), 276 (20), 277 (24), 279 (34), 280 (47), 281 (31), 288 (23), 289 (56), 290 (46), 292 (83), 293 (42), 294 (20), 302 (18), 303 (27), 304 (77), 305 (100), 306 (59), 307 (24), 326 (30), 327 (23), 362 (24), 366 (31), 367 (96), 368 (58), 370 (27), 380 (23), 382 (24,  $\text{M}^+$ ); anal. calcd. for  $\text{C}_{27}\text{H}_{30}\text{Si}$  (%): C: 84.76, H: 7.90; found: C: 84.85, H: 8.02.

**Product 42**

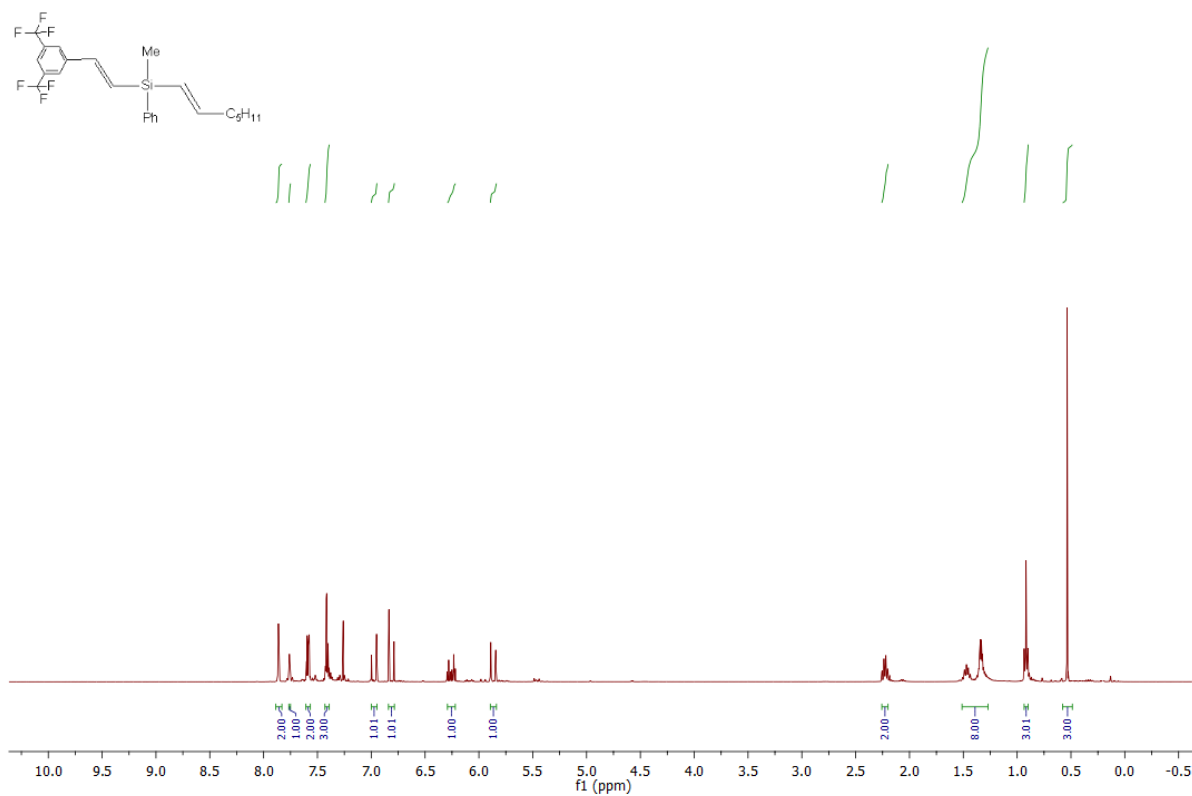

**Product 42**

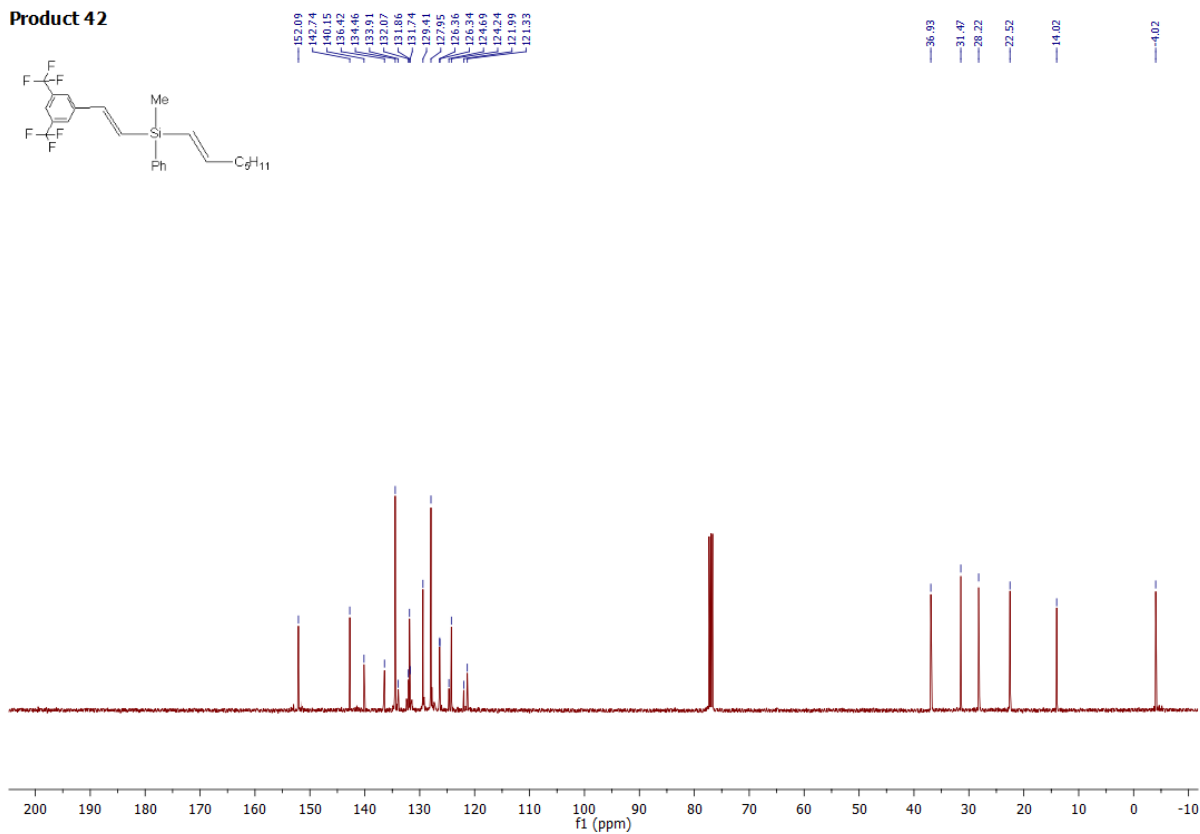



**Product 42**

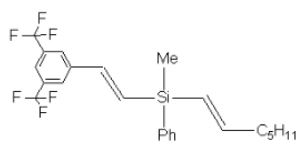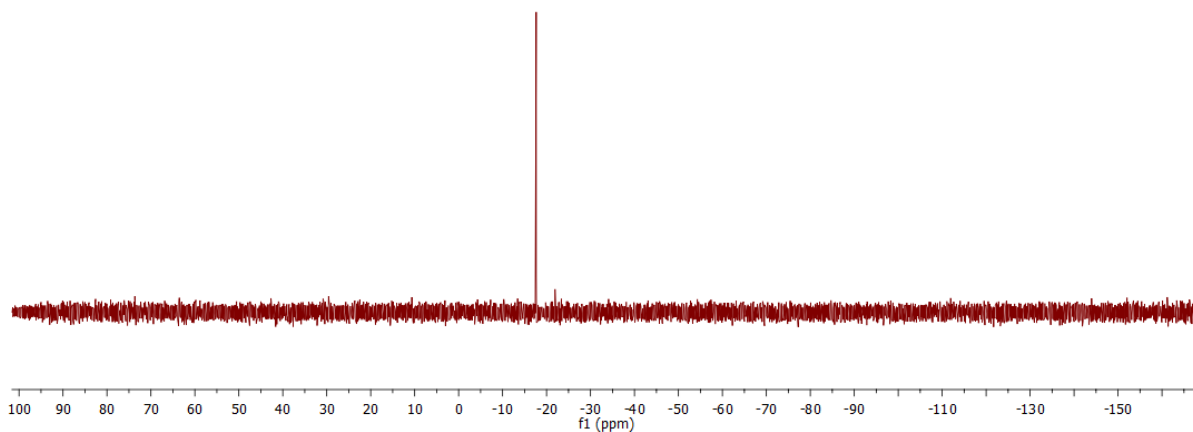

**Figure S120.**  $^{29}\text{Si}$  NMR (79 MHz,  $\text{CDCl}_3$ ) of product **42**

*Analytical data of product 42:*

Isolated yield: 88% (441.6 mg);  $^1\text{H}$  NMR ( $\text{CDCl}_3$ ,  $\delta$ , ppm): 0.54 (s, 3H,  $\text{CH}_3$ ), 0.89 – 0.94 (m, 3H,  $-(\text{CH}_2)_4\text{CH}_3$ ), 1.27 – 1.51 (m, 8H,  $-(\text{CH}_2)_4\text{CH}_3$ ), 2.20 – 2.26 (m, 2H,  $=\text{CHCH}_2$ ), 5.87 (dt, 1H,  $J_{\text{HH}} = 18.6$ , 1.5 Hz,  $=\text{CHSi}$ ), 6.26 (dt, 1H,  $J_{\text{HH}} = 18.6$ , 6.3 Hz,  $=\text{CHCH}_2$ ), 6.81 (d, 1H,  $J_{\text{HH}} = 19.1$  Hz,  $=\text{CHSi}$ ), 6.97 (d, 1H,  $J_{\text{HH}} = 19.1$  Hz,  $=\text{CHCH}_2$ ), 7.39 – 7.43 (m, 3H, Ph), 7.57 – 7.61 (m, 2H, Ph), 7.75 – 7.77 (m, 1H,  $-\text{C}_6\text{H}_3-$ ), 7.83 – 7.89 (m, 2H,  $-\text{C}_6\text{H}_3-$ );  $^{13}\text{C}$  NMR ( $\text{CDCl}_3$ ,  $\delta$ , ppm): -4.02 ( $\text{CH}_3$ ), 14.02, 22.52, 28.22, 31.47, 36.93, 121.33 (m,  $\text{CF}_3$ ), 121.99, 124.24, 124.69, 126.34, 126.36, 127.95, 129.41, 131.74, 131.86, 132.07, 133.91, 134.46, 136.42, 140.15, 142.74, 152.09;  $^{29}\text{Si}$  NMR ( $\text{CDCl}_3$ ,  $\delta$ , ppm): -17.56; MS:  $m/z$  (rel. intensity): 227 (15), 228 (12), 277 (12), 278 (43), 279 (17), 298 (100), 299 (30), 341 (28), 437 (15), 441 (8), 456 (3,  $\text{M}^+$ ); anal. calcd. for  $\text{C}_{24}\text{H}_{26}\text{F}_6\text{Si}$  (%): C: 63.14, H: 5.74; found: C: 63.30, H: 5.88.

**Product 43**

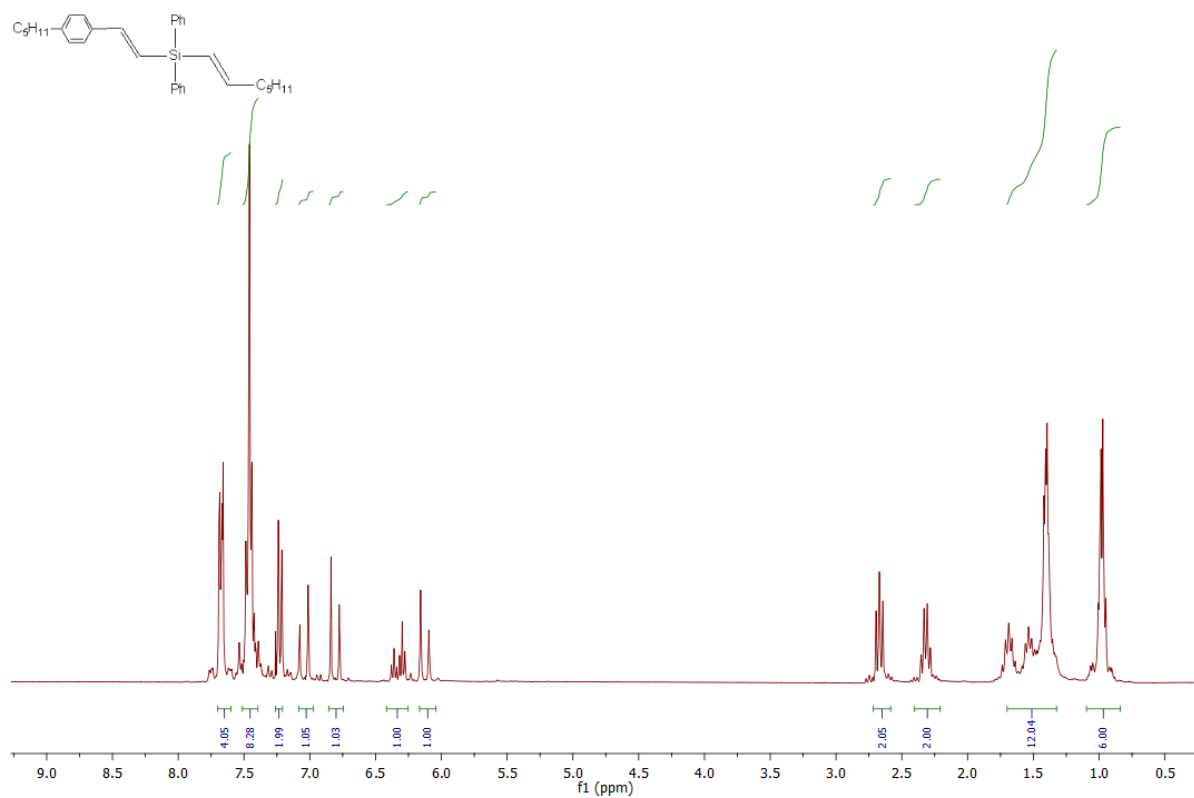

**Figure S121.** <sup>1</sup>H NMR (400 MHz, CDCl<sub>3</sub>) of product **43**

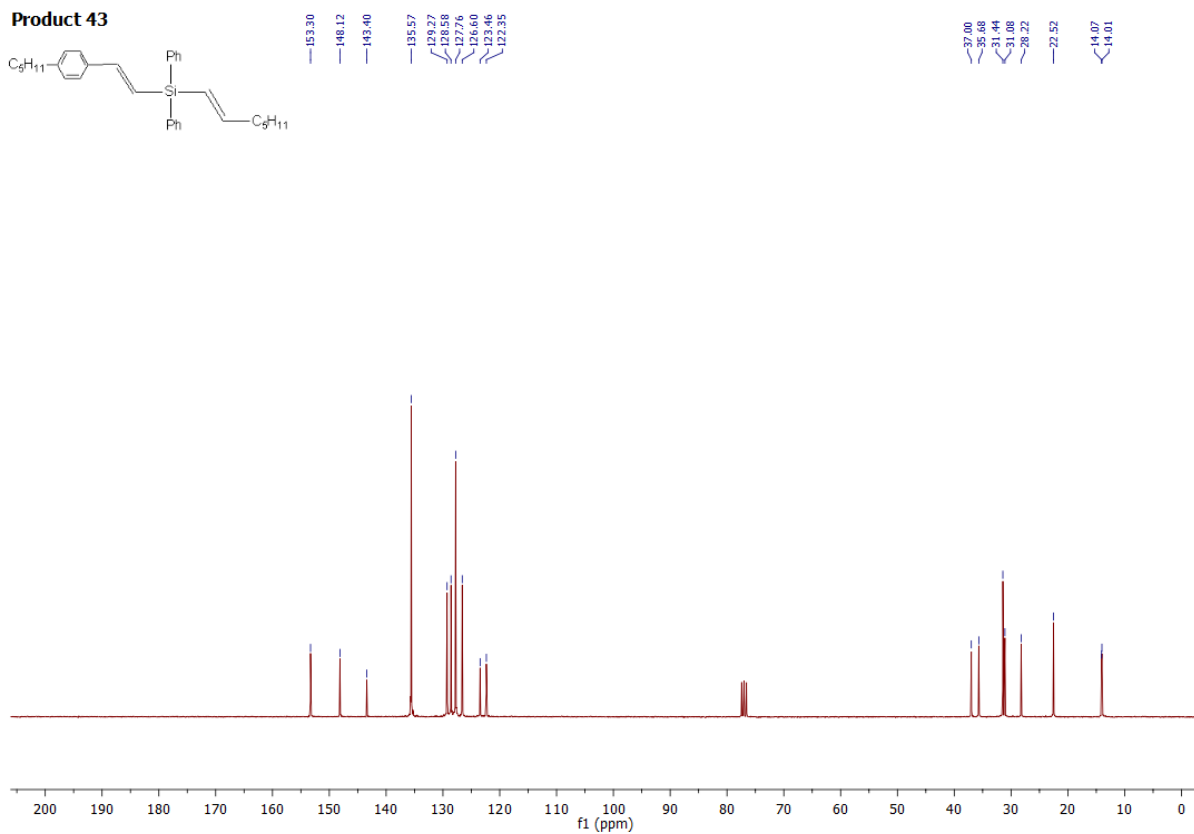

**Figure S122.** <sup>13</sup>C NMR (100 MHz, CDCl<sub>3</sub>) of product **43**

**Product 43**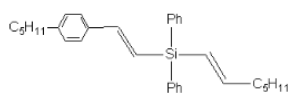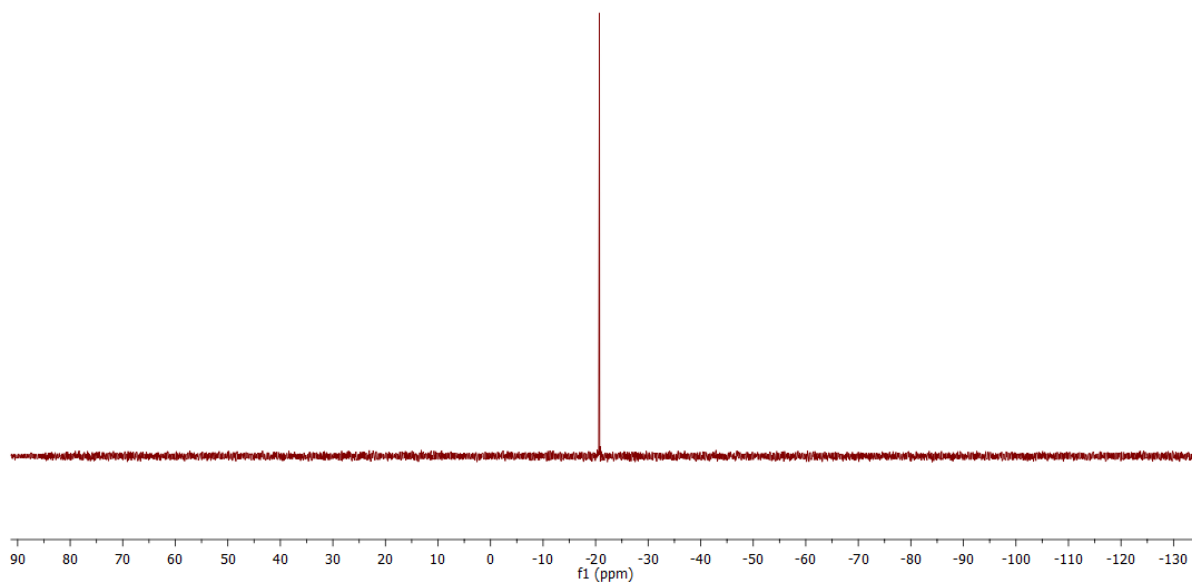**Figure S123.**  $^{29}\text{Si}$  NMR (79 MHz,  $\text{CDCl}_3$ ) of product **43***Analytical data of product 43:*

Isolated yield: 92% (457.7 mg);  $^1\text{H}$  NMR ( $\text{CDCl}_3$ ,  $\delta$ , ppm): 0.89 – 1.08 (m, 6H,  $-(\text{CH}_2)_4\text{CH}_3$ ), 1.36 – 1.72 (m, 12H,  $-(\text{CH}_2)_4\text{CH}_3$ ), 2.26 – 2.40 (m, 2H,  $-(\text{CH}_2)_4\text{CH}_3$ ), 2.61 – 2.72 (m, 2H,  $=\text{CHCH}_2$ ), 6.13 (d, 1H,  $J_{\text{HH}} = 18.5$  Hz,  $=\text{CHSi}$ ), 6.33 (dt, 1H,  $J_{\text{HH}} = 18.5$ , 6.1 Hz,  $=\text{CHCH}_2$ ), 6.81 (d, 1H,  $J_{\text{HH}} = 19.1$  Hz,  $=\text{CHSi}$ ), 7.04 (d, 1H,  $J_{\text{HH}} = 19.1$  Hz,  $=\text{CHCH}_2$ ), 7.23 (d, 2H,  $J_{\text{HH}} = 8.0$  Hz,  $-\text{C}_6\text{H}_4-$ ), 7.42 – 7.50 (m, 8H, Ph and  $-\text{C}_6\text{H}_4-$ ), 7.63 – 7.71 (m, 4H, Ph);  $^{13}\text{C}$  NMR ( $\text{CDCl}_3$ ,  $\delta$ , ppm): 14.01, 14.04, 22.52, 28.22, 31.08, 31.44, 35.68, 37.00, 122.35, 123.46, 126.60, 127.76, 128.58, 129.27, 135.57, 143.40, 148.12, 153.30;  $^{29}\text{Si}$  NMR ( $\text{CDCl}_3$ ,  $\delta$ , ppm): -20.67; MS:  $m/z$  (rel. intensity): 105 (15), 253 (31), 276 (18), 278 (60), 279 (40), 280 (28), 291 (24), 304 (17), 355 (35), 356 (22), 375 (20), 376 (78), 377 (42), 378 (16), 381 (47), 382 (28), 452 (100,  $\text{M}^+$ ); anal. calcd. for  $\text{C}_{32}\text{H}_{40}\text{Si}$  (%): C: 84.89, H: 8.91; found: C: 84.95, H: 8.99.

**Product 44**

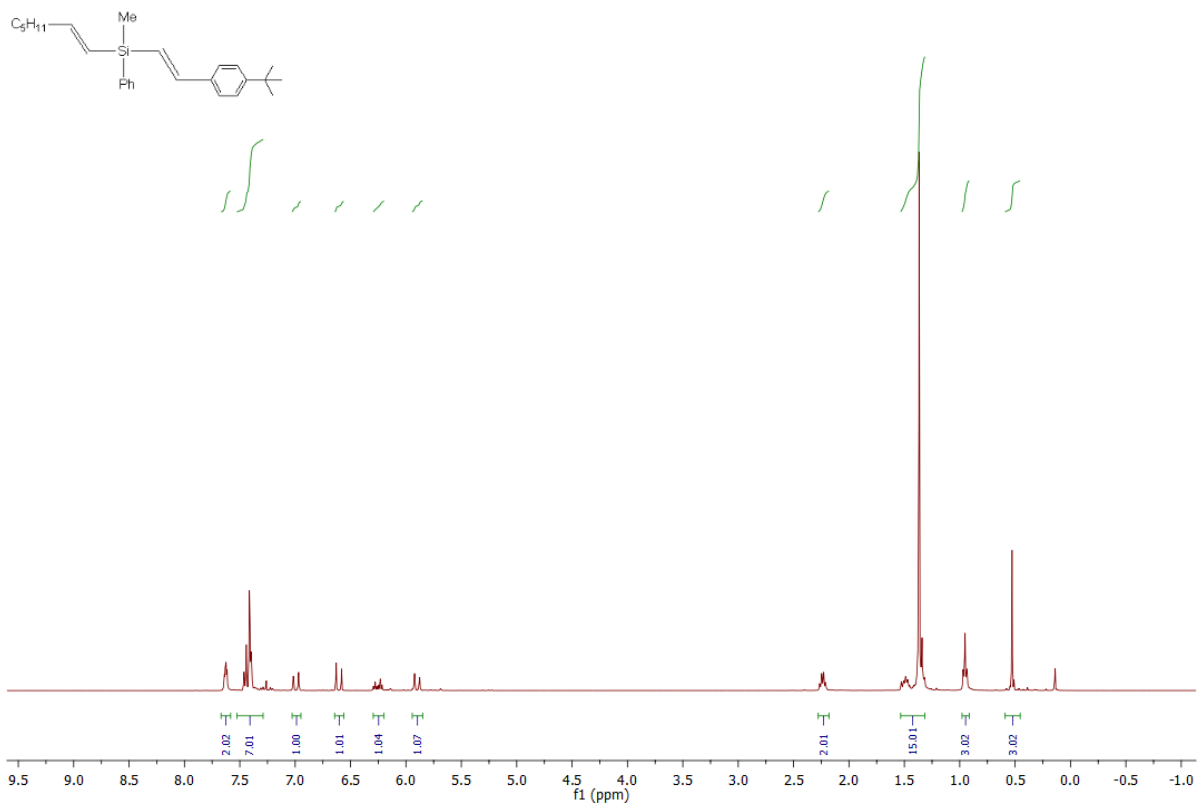

**Figure S124.** <sup>1</sup>H NMR (400 MHz, CDCl<sub>3</sub>) of product **44**

**Product 44**

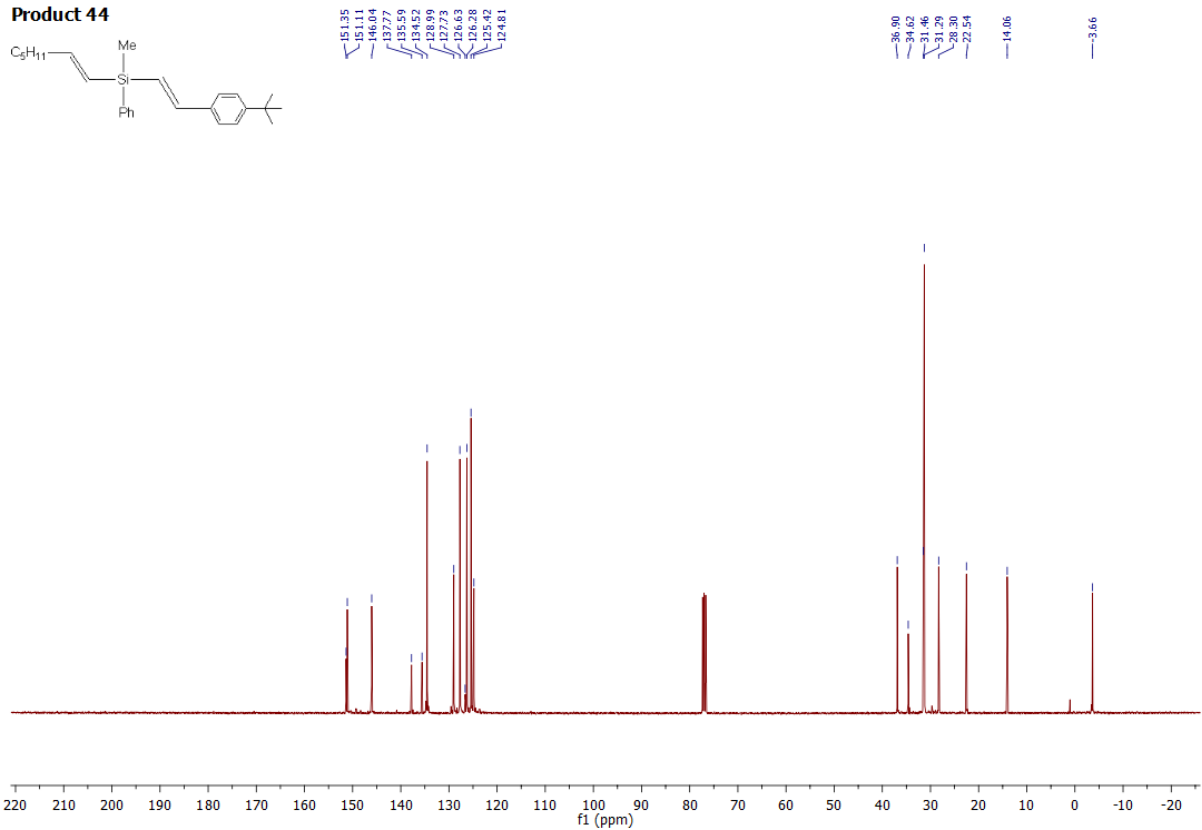

**Figure S125.** <sup>13</sup>C NMR (100 MHz, CDCl<sub>3</sub>) of product **44**

**Product 44**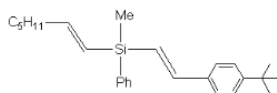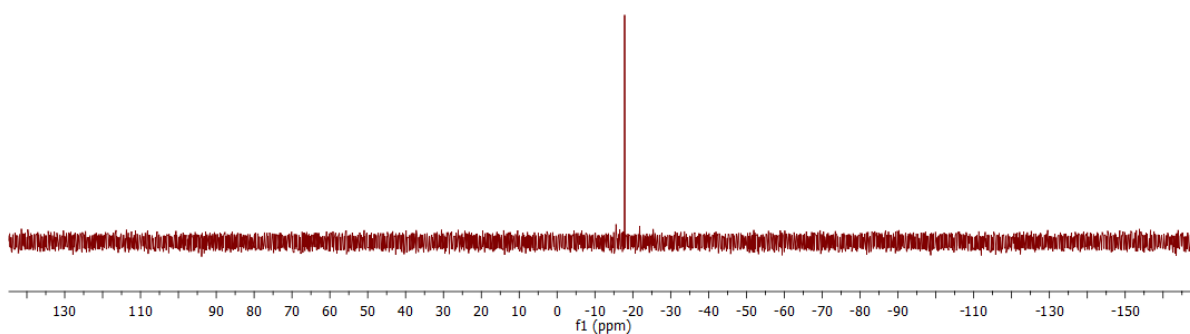**Figure S126.**  $^{29}\text{Si}$  NMR (79 MHz,  $\text{CDCl}_3$ ) of product **44***Analytical data of product 44:*

Isolated yield: 90% (372.5 mg);  $^1\text{H}$  NMR ( $\text{CDCl}_3$ ,  $\delta$ , ppm): 0.53 (s, 3H,  $\text{CH}_3$ ), 0.95 (t, 3H,  $J_{\text{HH}} = 7.0$  Hz,  $-(\text{CH}_2)_4\text{CH}_3$ ), 1.32 – 1.35 (m, 15H,  $\text{C}(\text{CH}_3)_3$  and  $-(\text{CH}_2)_4\text{CH}_3$ ), 2.18 – 2.28 (m, 2H,  $=\text{CHCH}_2$ ), 5.19 (d, 1H,  $J_{\text{HH}} = 18.5$  Hz,  $=\text{CHSi}$ ), 6.25 (dt, 1H,  $J_{\text{HH}} = 18.6$ , 6.3 Hz,  $=\text{CHCH}_2$ ), 6.61 (d, 1H,  $J_{\text{HH}} = 19.1$  Hz,  $=\text{CHSi}$ ), 6.99 (d, 1H,  $J_{\text{HH}} = 19.1$  Hz,  $=\text{CHCH}_2$ ), 7.29 – 7.53 (m, 7H, Ph and  $-\text{C}_6\text{H}_4-$ ), 7.58 – 7.68 (m, 2H, Ph);  $^{13}\text{C}$  NMR ( $\text{CDCl}_3$ ,  $\delta$ , ppm): -3.66 ( $\text{CH}_3$ ), 14.06, 22.54, 28.30, 31.29, 31.46, 34.62, 36.90, 124.81, 125.42, 126.28, 126.63, 127.73, 128.99, 134.52, 135.69, 137.77, 146.04, 151.11, 151.35;  $^{29}\text{Si}$  NMR ( $\text{CDCl}_3$ ,  $\delta$ , ppm): -17.84; MS:  $m/z$  (rel. intensity): 57 (76), 105 (14), 121 (33), 122 (10), 145 (27), 146 (14), 147 (11), 158 (13), 159 (15), 171 (11), 172 (10), 177 (11), 187 (11), 215 (21), 216 (14), 217 (20), 221 (11), 235 (12), 250 (18), 264 (18), 278 (12), 280 (19), 291 (21), 298 (14), 230 (26), 305 (32), 306 (24), 319 (10), 361 (100), 362 (33), 376 (98,  $\text{M}^+$ ); anal. calcd. for  $\text{C}_{26}\text{H}_{36}\text{Si}$  (%): C: 82.91, H: 9.63; found: C: 82.99, H: 9.71.

**Product 45**

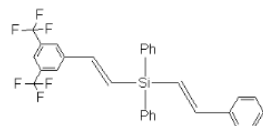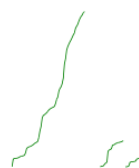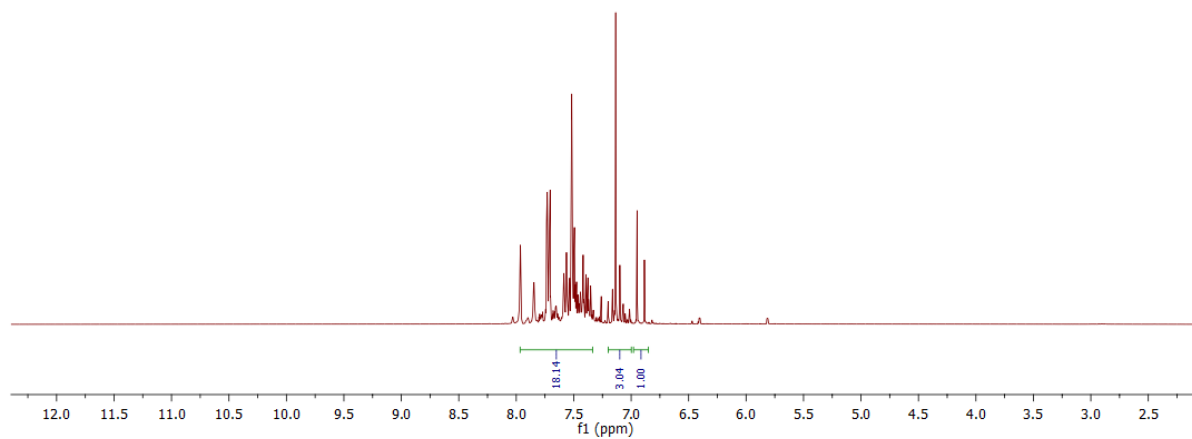

**Figure S127.**  $^1\text{H}$  NMR (400 MHz,  $\text{CDCl}_3$ ) of product **45**

**Product 45**

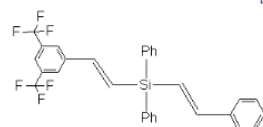

149.39  
145.03  
139.87  
137.76  
135.94  
135.66  
133.66  
132.70  
131.75  
129.94  
129.13  
128.75  
128.63  
128.15  
126.79  
126.71  
125.11  
121.93  
121.66

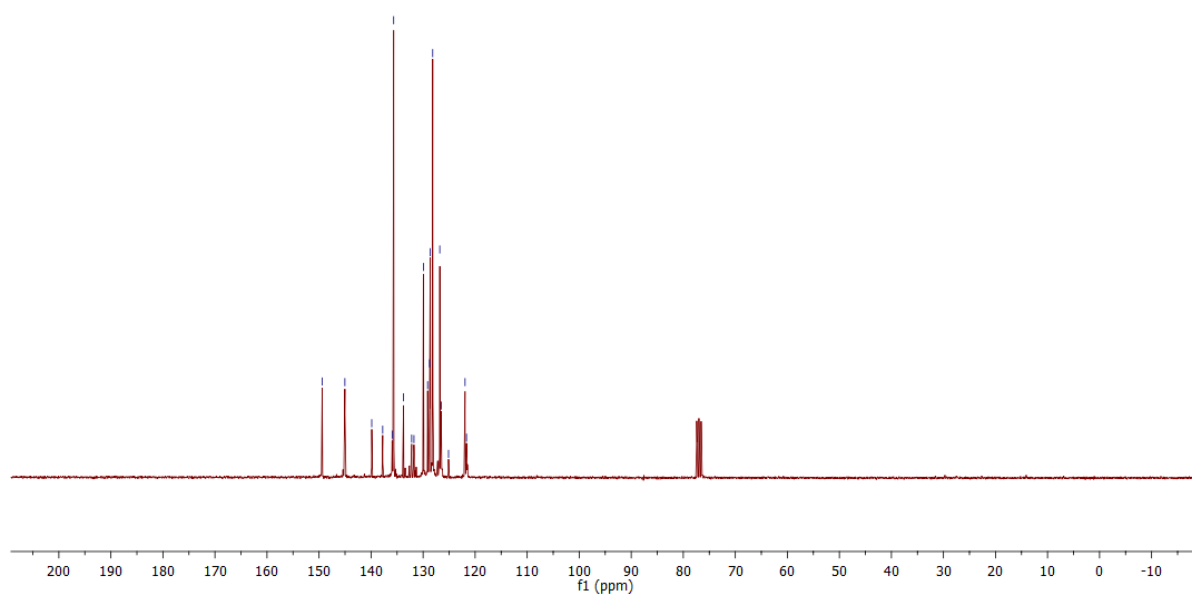

**Figure S128.**  $^{13}\text{C}$  NMR (100 MHz,  $\text{CDCl}_3$ ) of product **45**

**Product 45**

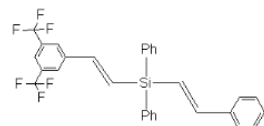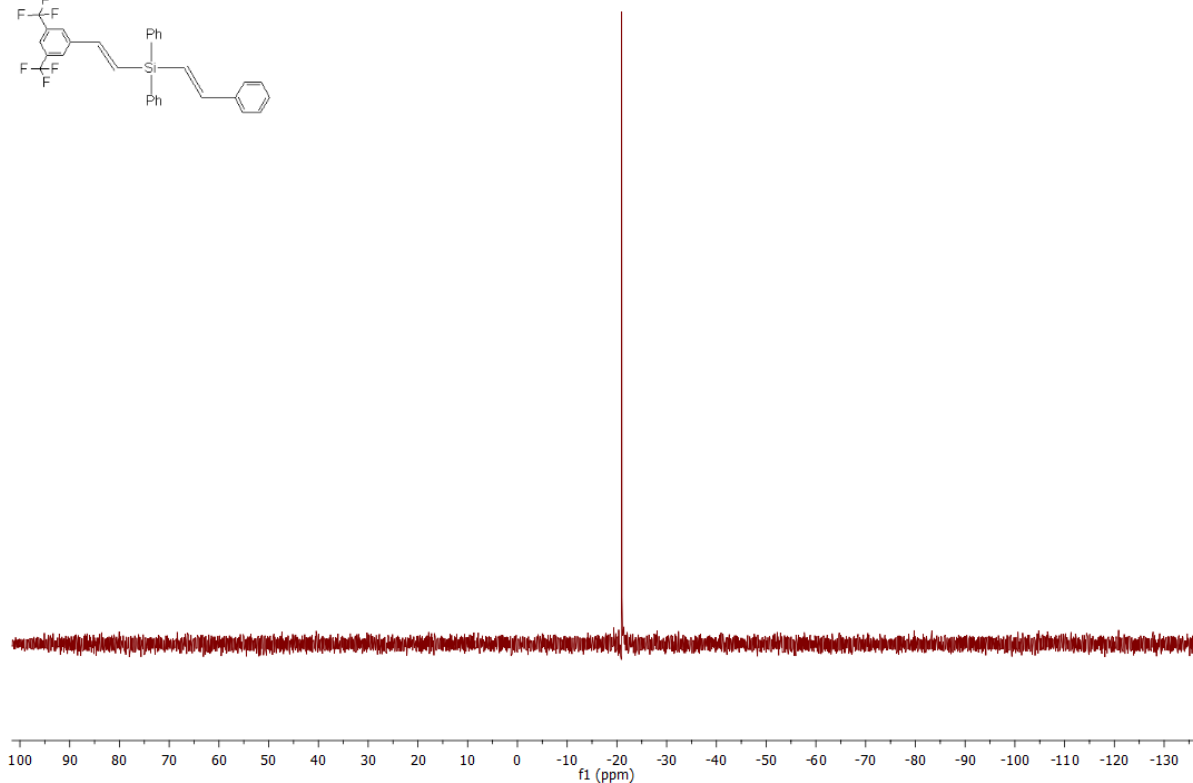

**Figure S129.**  $^{29}\text{Si}$  NMR (79 MHz,  $\text{CDCl}_3$ ) of product **45**

*Analytical data of product 45:*

Isolated yield: 86% (495.8 mg);  $^1\text{H}$  NMR ( $\text{CDCl}_3$ ,  $\delta$ , ppm): 6.92 (d, 1H,  $J_{\text{HH}} = 19.1$  Hz, =CHSi), 7.01 – 7.21 (m, 3H, =CHSi and =CHCH<sub>2</sub>), 7.35 – 7.97 (m, 18H, Ph and  $-\text{C}_6\text{H}_5$ );  $^{13}\text{C}$  NMR ( $\text{CDCl}_3$ ,  $\delta$ , ppm): 121.66 (m, CF<sub>3</sub>), 121.93, 125.11, 126.54 (d,  $J = 3.1$  Hz), 126.79, 128.15, 128.63, 128.75, 129.13, 129.94, 131.75, 132.20, 133.76, 135.56, 135.94, 137.76, 139.87, 145.03, 149.39;  $^{29}\text{Si}$  NMR ( $\text{CDCl}_3$ ,  $\delta$ , ppm): -19.23; MS:  $m/z$  (rel. intensity): 51 (22), 77 (29), 103 (23), 104 (20), 181 (22), 183 (36), 201 (22), 219 (19), 227 (17), 278 (77), m279 (28), 362 (17), 421 (100), 422 (29), 446 (15), 447 (19), 505 (53), 506 (17), 524 (13, M<sup>+</sup>); anal. calcd. for C<sub>30</sub>H<sub>22</sub>F<sub>6</sub>Si (%): C: 68.69, H: 4.23; found: C: 68.80, H: 4.31.

**Product 46**

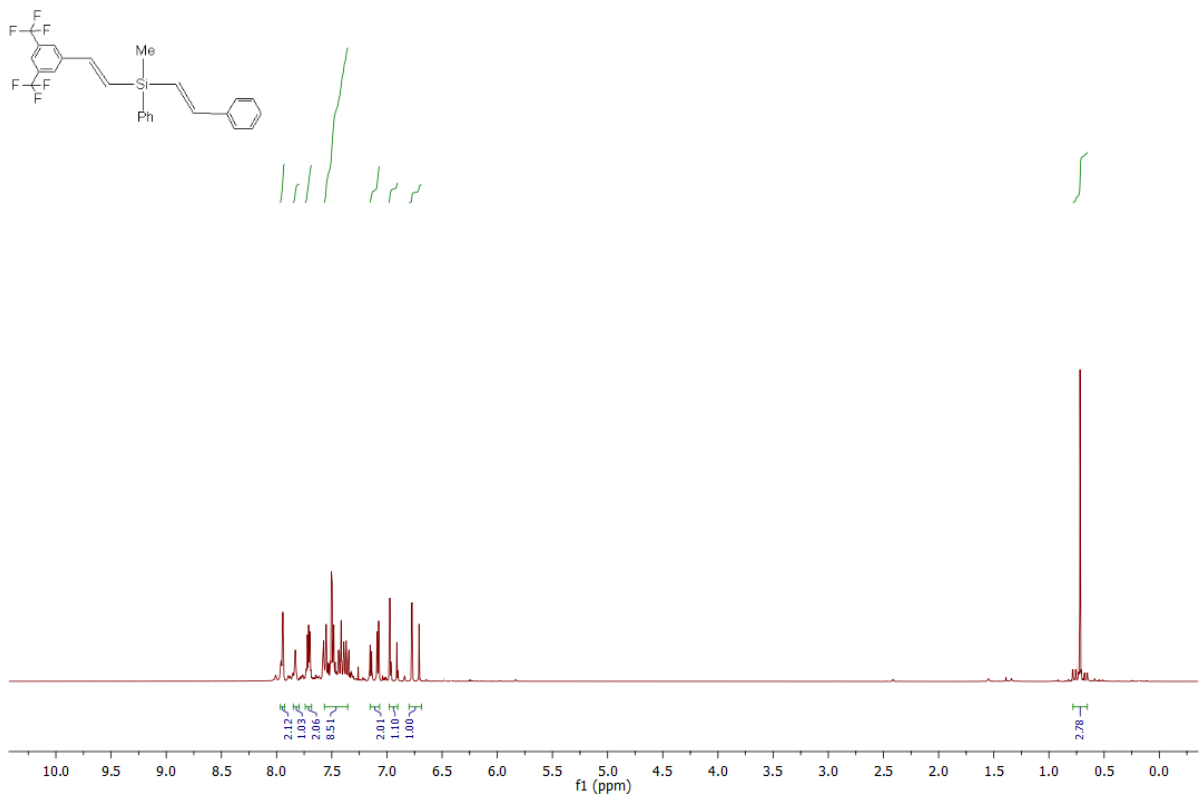

**Figure S130.**  $^1\text{H}$  NMR (400 MHz,  $\text{CDCl}_3$ ) of product **46**

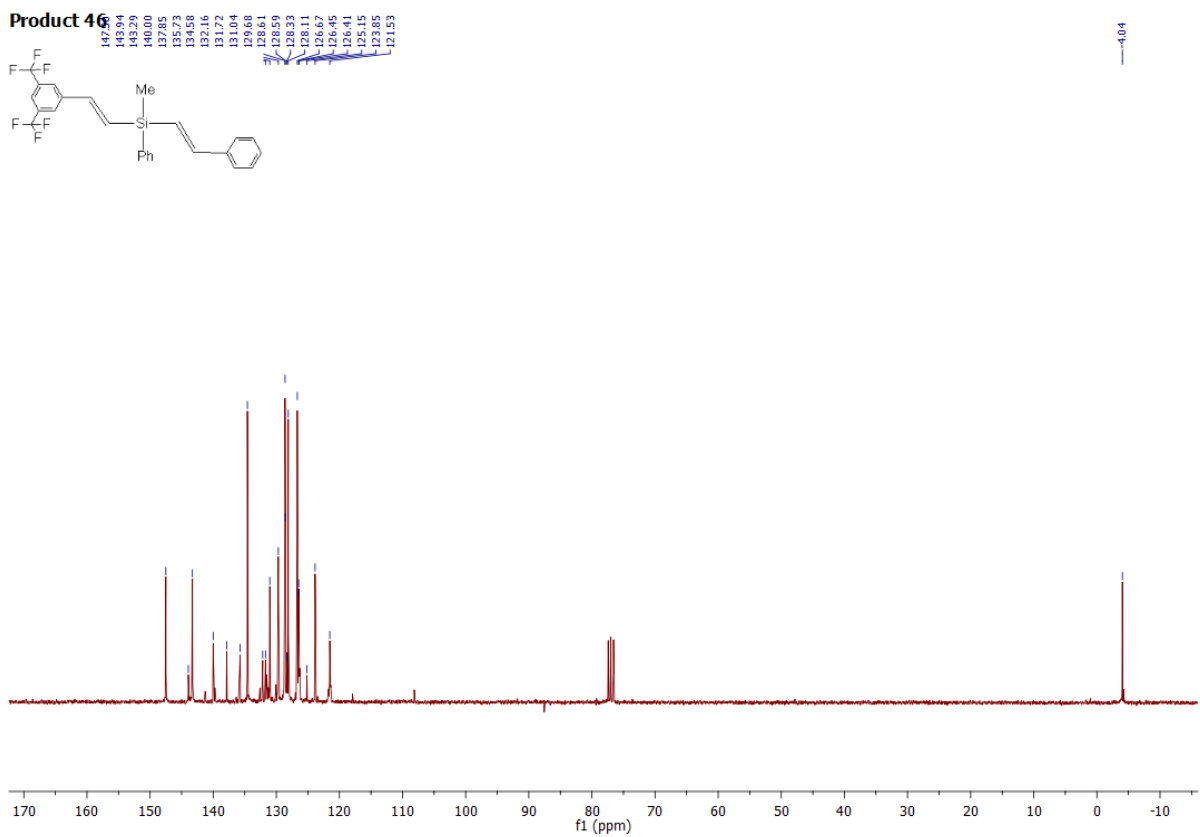

**Figure S131.**  $^{13}\text{C}$  NMR (100 MHz,  $\text{CDCl}_3$ ) of product **46**



**Product 46**

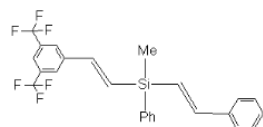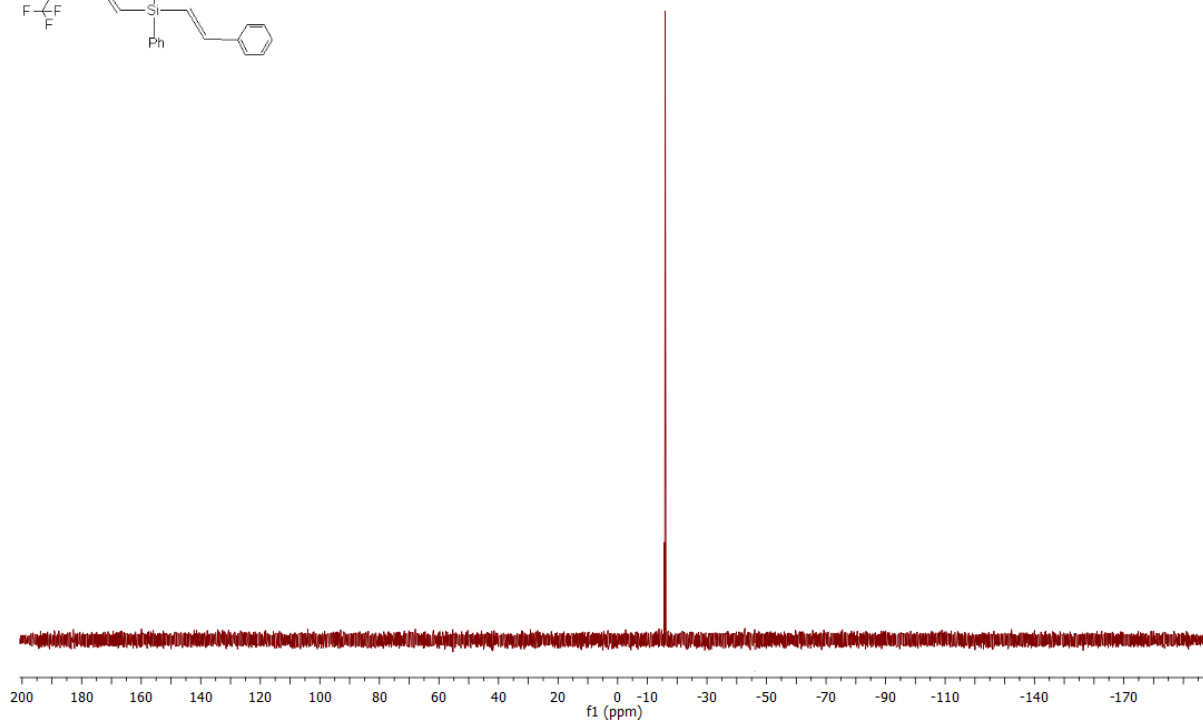

**Figure S132.**  $^{29}\text{Si}$  NMR (79 MHz,  $\text{CDCl}_3$ ) of product **46**

*Analytical data of product 46:*

Isolated yield: 88% (447.3 mg);  $^1\text{H}$  NMR ( $\text{CDCl}_3$ ,  $\delta$ , ppm): 0.72 (s, 3H,  $\text{CH}_3$ ), 6.74 (d, 1H,  $J_{\text{HH}} = 19.2$  Hz,  $=\text{CHSi}$ ), 6.94 (d, 1H,  $J_{\text{HH}} = 19.1$  Hz,  $=\text{CHSi}$ ), 7.11 (d, 1H,  $J_{\text{HH}} = 19.1$  Hz,  $=\text{CHCH}_2$ ), 7.12 (d, 1H,  $J_{\text{HH}} = 19.2$  Hz,  $=\text{CHCH}_2$ ), 7.35 – 7.56 (m, 8H, Ph), 7.68 – 7.74 (m, 2H, Ph), 7.81 – 7.85 (m, 1H,  $-\text{C}_6\text{H}_4-$ ), 7.93 – 7.96 (m, 2H,  $-\text{C}_6\text{H}_4-$ );  $^{13}\text{C}$  NMR ( $\text{CDCl}_3$ ,  $\delta$ , ppm): -4.04 ( $\text{CH}_3$ ), 121.53 (m,  $\text{CF}_3$ ), 123.85, 125.15, 126.43 (d,  $J = 2.9$  Hz), 126.67, 128.11, 128.31, 128.59, 128.61, 129.68, 131.04, 131.72, 132.16, 134.58, 135.73, 137.85, 140.00, 143.29, 143.94, 147.50;  $^{29}\text{Si}$  NMR ( $\text{CDCl}_3$ ,  $\delta$ , ppm): -15.82; MS:  $m/z$  (rel. intensity): 51 (11), 91 (11), 105 (20), 139 (26), 145 (14), 219 (10), 278 (10), 283 (12), 284 (13), 303 (24), 304 (100), 305 (18), 443 (40), 444 (11), 462 (12,  $\text{M}^+$ ); anal. calcd. for  $\text{C}_{25}\text{H}_{20}\text{F}_6\text{Si}$  (%): C: 64.92, H: 4.36; found: C: 65.12, H: 4.52.

**Product 47**

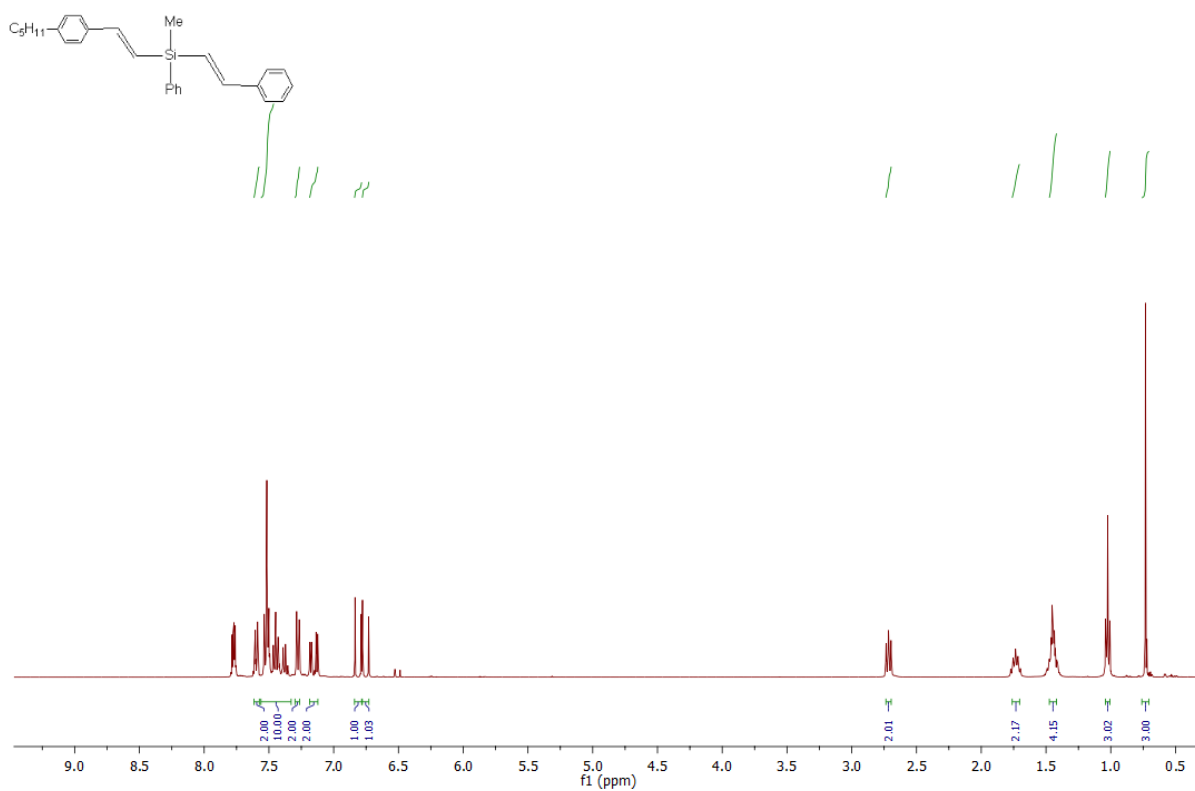

**Figure S133.**  $^1\text{H}$  NMR (400 MHz,  $\text{CDCl}_3$ ) of product **47**

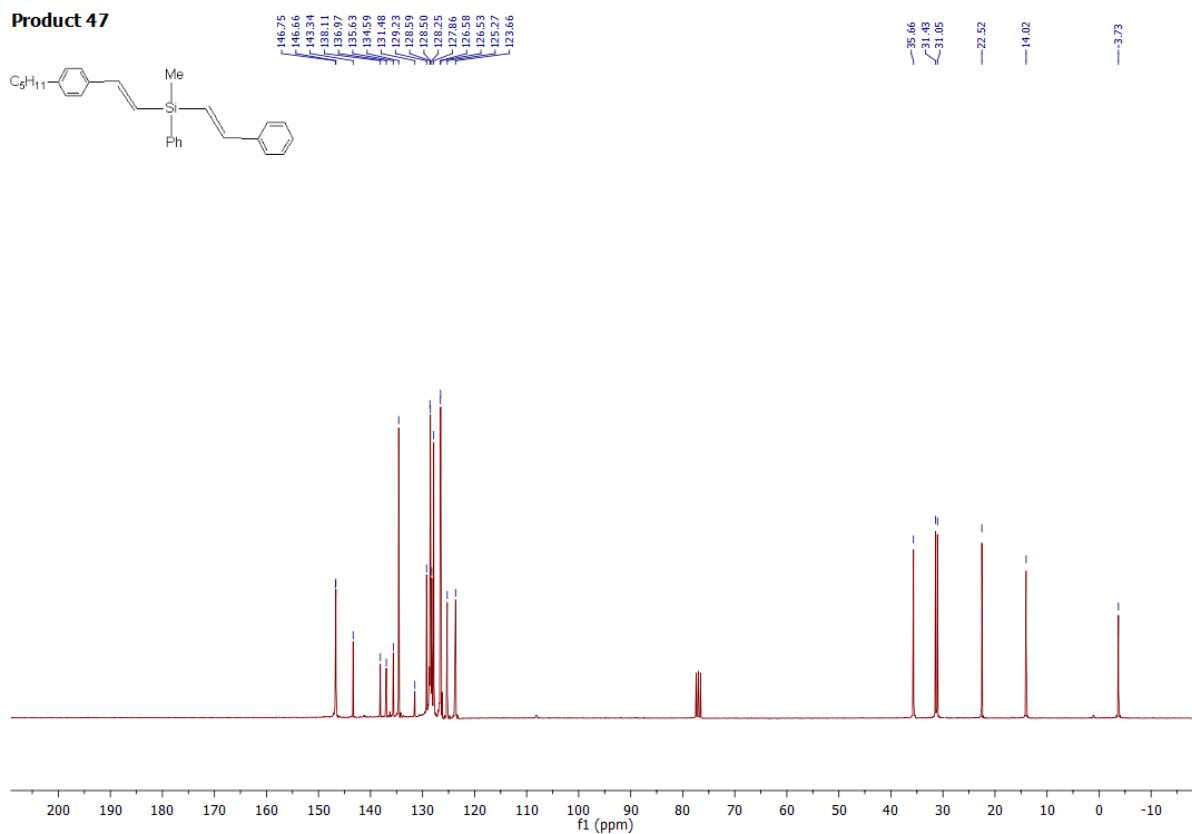

**Figure S134.**  $^{13}\text{C}$  NMR (100 MHz,  $\text{CDCl}_3$ ) of product **47**

**Product 47**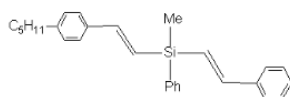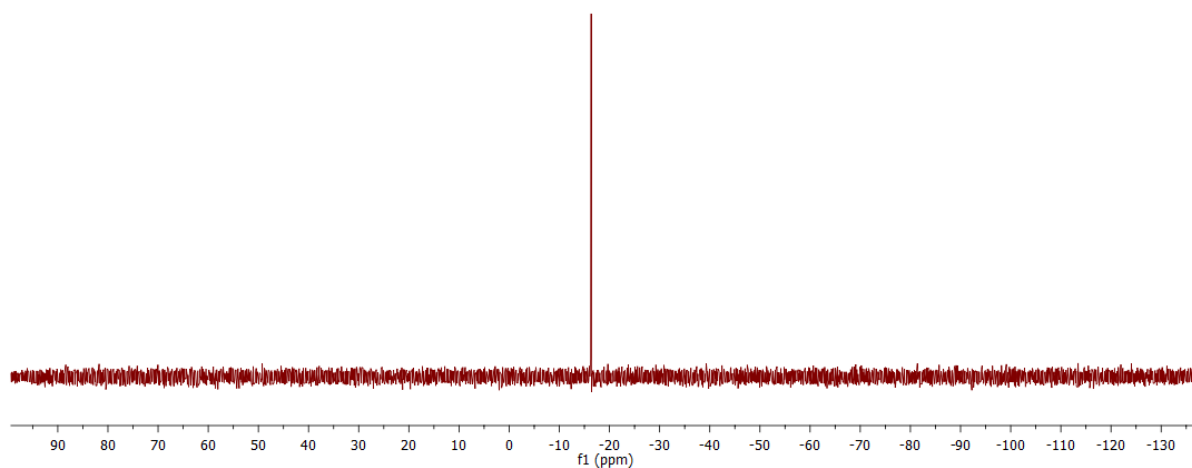**Figure S135.**  $^{29}\text{Si}$  NMR (79 MHz,  $\text{CDCl}_3$ ) of product **47***Analytical data of product 47:*

Isolated yield: 90% (392.3 mg);  $^1\text{H}$  NMR ( $\text{CDCl}_3$ ,  $\delta$ , ppm): 0.73 (s, 3H,  $\text{CH}_3$ ), 1.02 (t, 3H,  $J_{\text{HH}} = 6.9$  Hz,  $-(\text{CH}_2)_4\text{CH}_3$ ), 1.37 – 1.50 (m, 4H,  $-(\text{CH}_2)_4\text{CH}_3$ ), 1.67 – 1.80 (m, 2H,  $-(\text{CH}_2)_4\text{CH}_3$ ), 2.66 – 2.76 (m, 2H,  $=\text{CHCH}_2$ ), 6.75 (d, 1H,  $J_{\text{HH}} = 19.1$  Hz,  $=\text{CHSi}$ ), 6.81 (d, 1H,  $J_{\text{HH}} = 19.1$  Hz,  $=\text{CHSi}$ ), 7.15 (d, 1H,  $J_{\text{HH}} = 19.1$  Hz,  $=\text{CHCH}_2$ ), 7.16 (d, 1H,  $J_{\text{HH}} = 19.1$  Hz,  $=\text{CHCH}_2$ ), 7.28 (d, 2H,  $J_{\text{HH}} = 8.1$  Hz,  $-\text{C}_6\text{H}_4-$ ), 7.35 – 7.54 (m, 10H, Ph and  $-\text{C}_6\text{H}_4-$ ), 7.57 – 7.62 (m, 2H, Ph);  $^{13}\text{C}$  NMR ( $\text{CDCl}_3$ ,  $\delta$ , ppm): -3.73 ( $\text{CH}_3$ ), 14.02, 22.52, 31.05, 31.43, 31.66, 123.66, 125.27, 126.55 (d,  $J = 3.6$  Hz), 127.86, 128.25, 128.50, 128.59, 129.23, 131.48, 134.59, 135.63, 136.97, 128.11, 143.34, 146.66, 146.75;  $^{29}\text{Si}$  NMR ( $\text{CDCl}_3$ ,  $\delta$ , ppm): -16.35; MS:  $m/z$  (rel. intensity): 105 (18), 249 (19), 250 (24), 277 (38), 291 (15), 292 (25), 293 (44), 294 (20), 304 (17), 305 (73), 307 (44), 308 (18), 317 (18), 318 (70), 319 (100), 320 (51), 321 (23), 381 (54), 383 (36), 384 (17), 389 (18), 396 (26,  $\text{M}^+$ ); anal. calcd. for  $\text{C}_{28}\text{H}_{32}\text{Si}$  (%): C: 84.79, H: 8.13; found: C: 84.92, H: 8.28.

**Product 48**

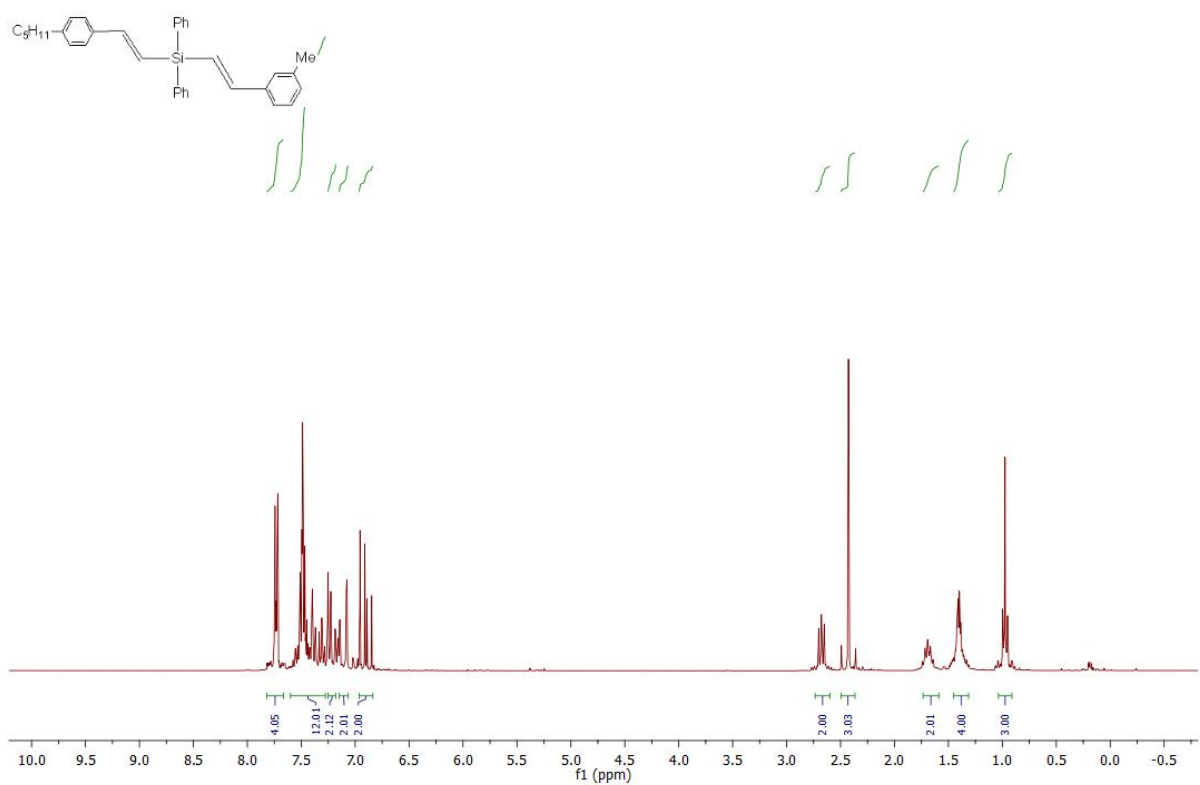

**Figure S136.** <sup>1</sup>H NMR (400 MHz, CDCl<sub>3</sub>) of product **48**

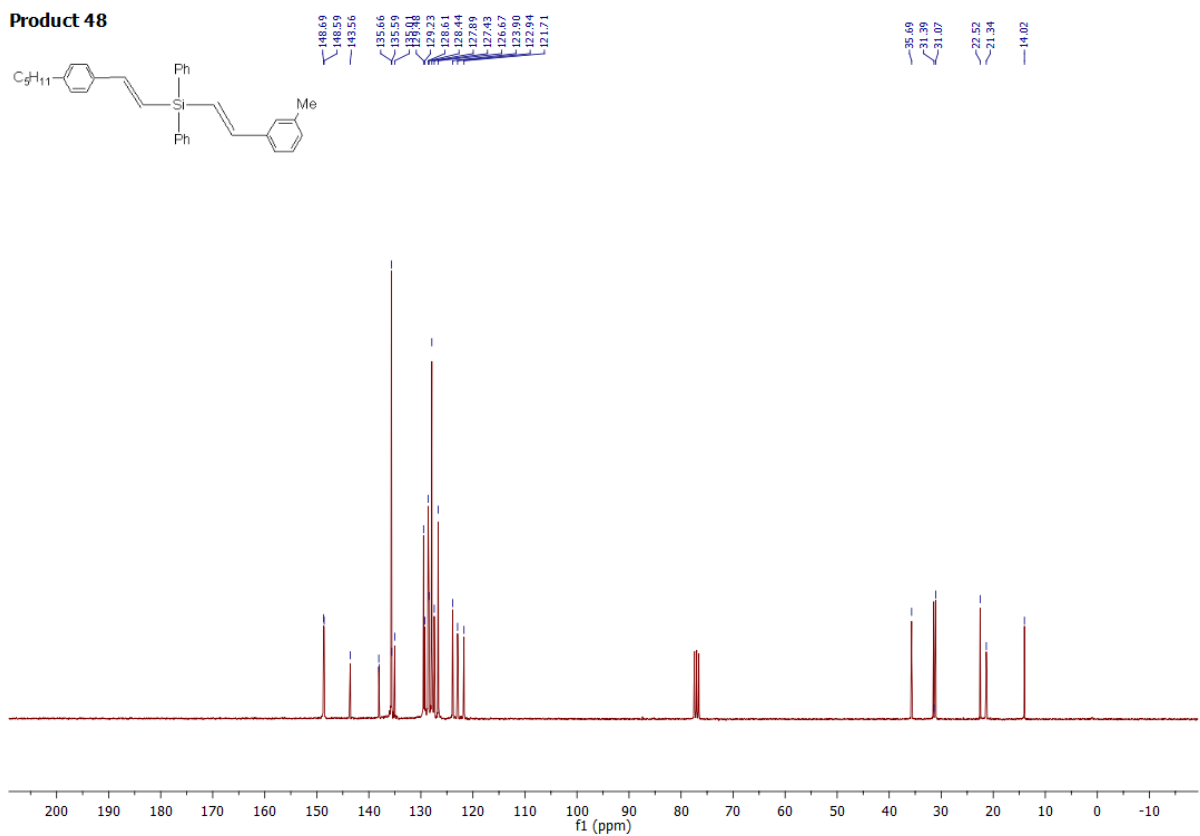

**Figure S137.** <sup>13</sup>C NMR (100 MHz, CDCl<sub>3</sub>) of product **48**

**Product 48**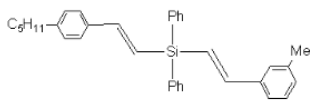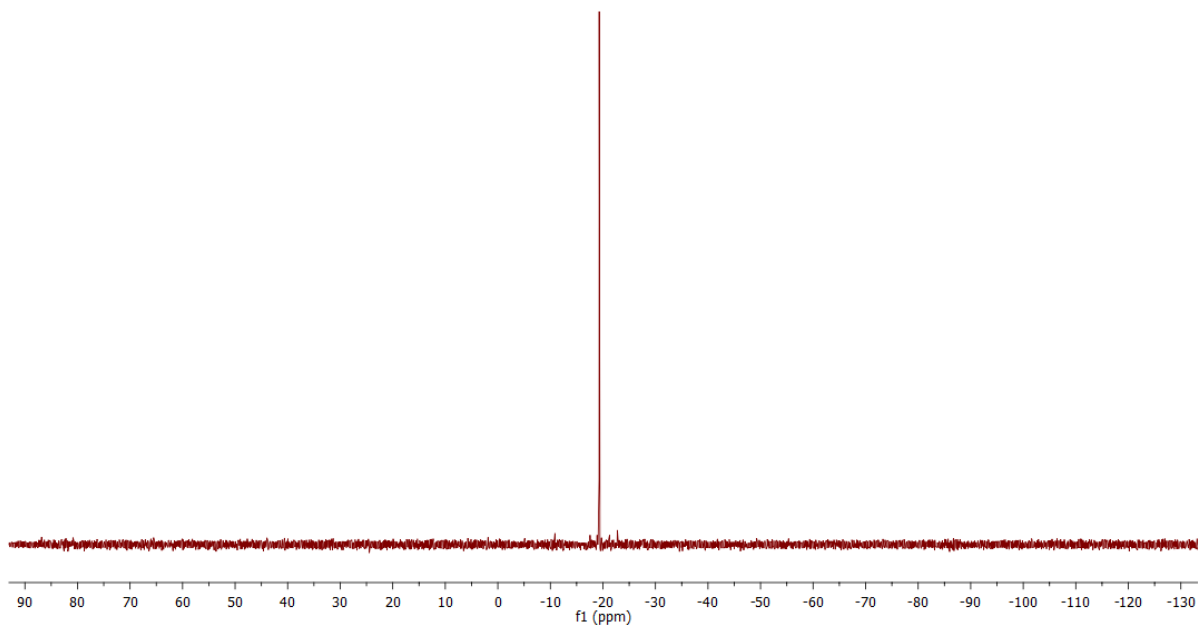**Figure S138.**  $^{29}\text{Si}$  NMR (79 MHz,  $\text{CDCl}_3$ ) of product **48***Analytical data of product 48:*

Isolated yield: 92% (477.9 mg);  $^1\text{H}$  NMR ( $\text{CDCl}_3$ ,  $\delta$ , ppm): 0.98 (t, 3H,  $J_{\text{HH}} = 6.9$  Hz,  $-(\text{CH}_2)_4\text{CH}_3$ ), 1.33 – 1.44 (m, 4H,  $-(\text{CH}_2)_4\text{CH}_3$ ), 1.62 – 1.74 (m, 2H,  $-(\text{CH}_2)_4\text{CH}_3$ ), 2.43 (s, 3H,  $\text{CH}_3$ ), 2.62 – 2.73 (m, 2H,  $=\text{CHCH}_2$ ), 6.88 (d, 1H,  $J_{\text{HH}} = 19.1$  Hz,  $=\text{CHSi}$ ), 6.92 (d, 1H,  $J_{\text{HH}} = 19.1$  Hz,  $=\text{CHCH}_2$ ), 7.11 (d, 1H,  $J_{\text{HH}} = 19.2$  Hz,  $=\text{CHSi}$ ), 7.12 (d, 1H,  $J_{\text{HH}} = 19.2$  Hz,  $=\text{CHCH}_2$ ), 7.18 – 7.25 (m, 2H, Ar), 7.28 – 7.542 (m, 12H, Ar), 7.68 – 7.77 (m, 4H, Ar);  $^{13}\text{C}$  NMR ( $\text{CDCl}_3$ ,  $\delta$ , ppm): 14.02, 21.34, 22.52, 31.07, 31.44, 35.69, 121.71, 122.94, 123.90, 126.67, 127.43, 127.89, 128.44, 128.61, 129.23, 129.48, 135.01, 135.66, 138.00, 138.08, 143.56, 148.59, 148.69;  $^{29}\text{Si}$  NMR ( $\text{CDCl}_3$ ,  $\delta$ , ppm): -19.30; MS:  $m/z$  (rel. intensity): 105 (21), 181 (22), 206 (16), 220 (18), 221 (43), 222 (28), 234 (15), 235 (23), 278 (22), 279 (23), 291 (31), 292 (18), 311 (62), 612 (25), 324 (28), 105 (21), 181 (22), 206 (16), 220 (18), 221 (43), 222 (28), 234 (15), 235 (23), 278 (22), 278 (23), 291 (31), 292 (18), 311 (62), 312 (25), 324 (28), 367 (66), 368 (35), 380 (19), 381 (83), 382 (28), 394 (91), 395 (100), 472 (285,  $\text{M}^+$ ); anal. calcd. for  $\text{C}_{34}\text{H}_{36}\text{Si}$  (%): C: 86.38, H: 7.68; found: C: 86.26, H: 7.52.
